# Supplementary material
Source: publisher figshare collection journal article supplement (https://gsajournals.figshare.com/ndownloader/files/22079781)
Supplement: Supplementary file 1 [file 22079781]

## Sheet: T6_LL_GO
X1	Category	ID	Term	Genes	adj_pval
1	MF	GO:0005131	growth hormone receptor binding	gene26108:106565139, gene26826:106565979, gene28441:106567289	6.4e-05
2	MF	GO:0005159	insulin-like growth factor receptor bind...	gene20824:106613792, gene26108:106565139, gene26826:106565979, gene28441:106567289	0.00015
3	MF	GO:0070330	aromatase activity	gene23207:100136926, gene48784:100136916	0.00103
4	MF	GO:0019103	pyrimidine nucleotide binding	gene18767:106611738, gene32862:100380418	0.00346
5	MF	GO:0030911	TPR domain binding	gene32862:100380418, gene9916:106603240	0.00381
6	MF	GO:0005102	receptor binding	gene11499:106604864, gene14257:106607467, gene15093:106608273, gene18767:106611738, gene18791:106611717, gene18957:106611923, gene20824:106613792, gene22457:106561638, gene22701:106561865, gene22843:106561995, gene22974:106562111, gene25803:106564804, gene26108:106565139, gene26826:106565979, gene28441:106567289, gene28816:106567683, gene29323:106568156, gene30785:106569679, gene32862:100380418, …	0.00387
7	MF	GO:0001077	transcriptional activator activity, RNA ...	gene10457:106603906, gene15093:106608273, gene18950:106611930, gene25416:106564566, gene28553:106567483, gene32174:106571028, gene39631:106578540, gene41882:106580735, gene44237:106583131	0.00468
8	MF	GO:0030165	PDZ domain binding	gene14257:106607467, gene15093:106608273, gene22400:100136366, gene36296:106575175, gene40618:106579507, gene42294:106581151	0.00542
9	MF	GO:0030674	protein binding, bridging	gene20824:106613792, gene26108:106565139, gene26209:106565346, gene28441:106567289, gene33543:106572414, gene43271:106582091, gene44582:100196052	0.00565
10	MF	GO:0005104	fibroblast growth factor receptor bindin...	gene22457:106561638, gene29323:106568156	0.00626
11	MF	GO:0001206	transcriptional repressor activity, RNA ...	gene10188:106603639, gene28770:106567727	0.0072
12	MF	GO:0000977	RNA polymerase II regulatory region sequ...	gene10188:106603639, gene10457:106603906, gene14645:106607825, gene15093:106608273, gene16077:106609245, gene18950:106611930, gene25416:106564566, gene28553:106567483, gene28770:106567727, gene32174:106571028, gene39436:106578343, gene39631:106578540, gene41882:106580735, gene6530:106599739	0.00761
13	MF	GO:0004888	transmembrane signaling receptor activit...	gene16874:106609958, gene18189:106611249, gene18767:106611738, gene22974:106562111, gene26498:106565668, gene2715:106567959, gene29763:100195489, gene30144:106568821, gene34016:106572862, gene34605:106573471, gene37267:106576173, gene3746:106578085	0.00844
14	MF	GO:0004896	cytokine receptor activity	gene22974:106562111, gene29763:100195489, gene3746:106578085	0.01464
15	MF	GO:0035035	histone acetyltransferase binding	gene10457:106603906, gene18950:106611930, gene39631:106578540	0.01532
16	MF	GO:0005527	macrolide binding	gene26209:106565346, gene44582:100196052	0.01608
17	MF	GO:0005528	FK506 binding	gene26209:106565346, gene44582:100196052	0.01608
18	MF	GO:0019200	carbohydrate kinase activity	gene4714:106587516, gene48141:106586902	0.01822
19	MF	GO:0001046	core promoter sequence-specific DNA bind...	gene10457:106603906, gene18950:106611930, gene32174:106571028, gene39631:106578540, gene41882:106580735	0.02042
20	MF	GO:0004995	tachykinin receptor activity	gene16874:106609958	0.0218
21	MF	GO:0008427	calcium-dependent protein kinase inhibit...	gene22701:106561865	0.0218
22	MF	GO:0070379	high mobility group box 1 binding	gene15093:106608273	0.0218
23	MF	GO:0031420	alkali metal ion binding	gene18339:106611380, gene28816:106567683	0.02364
24	MF	GO:0035254	glutamate receptor binding	gene22843:106561995, gene34605:106573471, gene41882:106580735	0.02488
25	MF	GO:0004950	chemokine receptor activity	gene29763:100195489, gene3746:106578085	0.0253
26	MF	GO:0016831	carboxy-lyase activity	gene18047:106611136, gene61616:106594092	0.0253
27	MF	GO:0031726	CCR1 chemokine receptor binding	gene30785:106569679	0.0261
28	MF	GO:0002135	CTP binding	gene32862:100380418	0.0261
29	MF	GO:0036004	GAF domain binding	gene9916:106603240	0.0261
30	MF	GO:0005111	type 2 fibroblast growth factor receptor...	gene29323:106568156	0.0261
31	MF	GO:0048156	tau protein binding	gene26209:106565346, gene44582:100196052	0.02787
32	MF	GO:0019825	oxygen binding	gene37891:106576803, gene816:106601984	0.02787
33	MF	GO:0001637	G-protein coupled chemoattractant recept...	gene29763:100195489, gene3746:106578085	0.02964
34	MF	GO:0015272	ATP-activated inward rectifier potassium...	gene28816:106567683	0.03039
35	MF	GO:0031798	type 1 metabotropic glutamate receptor b...	gene41882:106580735	0.03039
36	MF	GO:0004382	guanosine-diphosphatase activity	gene17920:106611031	0.03039
37	MF	GO:0004335	galactokinase activity	gene48141:106586902	0.03039
38	MF	GO:0032767	copper-dependent protein binding	gene44582:100196052	0.03039
39	MF	GO:0042979	ornithine decarboxylase regulator activi...	gene18047:106611136	0.03039
40	MF	GO:0042975	peroxisome proliferator activated recept...	gene18957:106611923, gene38727:106577610	0.03054
41	MF	GO:0003755	peptidyl-prolyl cis-trans isomerase acti...	gene26209:106565346, gene44582:100196052	0.03425
42	MF	GO:0019158	mannokinase activity	gene4714:106587516	0.03466
43	MF	GO:0004740	pyruvate dehydrogenase (acetyl-transferr...	gene7265:106600850	0.03466
44	MF	GO:0008865	fructokinase activity	gene4714:106587516	0.03466
45	MF	GO:0032564	dATP binding	gene32862:100380418	0.03466
46	MF	GO:0032558	adenyl deoxyribonucleotide binding	gene32862:100380418	0.03466
47	MF	GO:0071553	G-protein coupled pyrimidinergic nucleot...	gene18767:106611738	0.03466
48	MF	GO:0015065	uridine nucleotide receptor activity	gene18767:106611738	0.03466
49	MF	GO:0099600	transmembrane receptor activity	gene16874:106609958, gene18189:106611249, gene18767:106611738, gene22400:100136366, gene22974:106562111, gene26498:106565668, gene2715:106567959, gene28816:106567683, gene29763:100195489, gene30144:106568821, gene34016:106572862, gene34605:106573471, gene37267:106576173, gene3746:106578085	0.03466
50	MF	GO:0004930	G-protein coupled receptor activity	gene16874:106609958, gene18767:106611738, gene26498:106565668, gene29763:100195489, gene34016:106572862, gene3746:106578085	0.03521
51	MF	GO:0020037	heme binding	gene23207:100136926, gene37891:106576803, gene48784:100136916	0.03644
52	MF	GO:0004340	glucokinase activity	gene4714:106587516	0.0389
53	MF	GO:0042030	ATPase inhibitor activity	gene18991:106611988	0.0389
54	MF	GO:1990050	phosphatidic acid transporter activity	gene27168:106566111	0.0389
55	MF	GO:0008269	JAK pathway signal transduction adaptor ...	gene28441:106567289	0.0389
56	MF	GO:0017098	sulfonylurea receptor binding	gene32862:100380418	0.0389
57	MF	GO:0004396	hexokinase activity	gene4714:106587516	0.0389
58	MF	GO:0008519	ammonium transmembrane transporter activ...	gene18047:106611136, gene27580:106566494	0.04013
59	MF	GO:0016859	cis-trans isomerase activity	gene26209:106565346, gene44582:100196052	0.04013
60	MF	GO:0000980	RNA polymerase II distal enhancer sequen...	gene10188:106603639, gene28770:106567727, gene39631:106578540, gene41882:106580735	0.04017
61	MF	GO:0046906	tetrapyrrole binding	gene23207:100136926, gene37891:106576803, gene48784:100136916	0.041
62	MF	GO:0032551	pyrimidine ribonucleoside binding	gene32862:100380418	0.04313
63	MF	GO:0032554	purine deoxyribonucleotide binding	gene32862:100380418	0.04313
64	MF	GO:0002134	UTP binding	gene32862:100380418	0.04313
65	MF	GO:0019826	oxygen sensor activity	gene816:106601984	0.04313
66	MF	GO:0050839	cell adhesion molecule binding	gene18791:106611717, gene22701:106561865, gene2715:106567959, gene3980:106580063, gene42294:106581151, gene43271:106582091	0.04459
67	MF	GO:0035757	chemokine (C-C motif) ligand 19 binding	gene29763:100195489	0.04734
68	MF	GO:0035758	chemokine (C-C motif) ligand 21 binding	gene29763:100195489	0.04734
69	MF	GO:0038121	C-C motif chemokine 21 receptor activity	gene29763:100195489	0.04734
70	MF	GO:0038117	C-C motif chemokine 19 receptor activity	gene29763:100195489	0.04734
71	MF	GO:0016830	carbon-carbon lyase activity	gene18047:106611136, gene61616:106594092	0.04851
72	MF	GO:0008528	G-protein coupled peptide receptor activ...	gene16874:106609958, gene29763:100195489, gene3746:106578085	0.04965
73	BP	GO:0071873	response to norepinephrine	gene10457:106603906, gene18950:106611930, gene18957:106611923, gene38727:106577610	6.2e-06
74	BP	GO:0009409	response to cold	gene18957:106611923, gene32174:106571028, gene32862:100380418, gene38727:106577610, gene44237:106583131, gene48141:106586902, gene50557:106588986	3.6e-05
75	BP	GO:0071372	cellular response to follicle-stimulatin...	gene10457:106603906, gene18950:106611930, gene18957:106611923, gene38727:106577610	3.7e-05
76	BP	GO:0007595	lactation	gene14257:106607467, gene26108:106565139, gene26826:106565979, gene28441:106567289, gene39631:106578540, gene4714:106587516	6.7e-05
77	BP	GO:0071320	cellular response to cAMP	gene10457:106603906, gene18950:106611930, gene22400:100136366, gene28545:100196802, gene29156:106567763, gene37891:106576803	9.1e-05
78	BP	GO:0051591	response to cAMP	gene10457:106603906, gene14257:106607467, gene18950:106611930, gene22400:100136366, gene25416:106564566, gene28545:100196802, gene29156:106567763, gene30144:106568821, gene32174:106571028, gene37891:106576803, gene38727:106577610, gene39631:106578540	0.00011
79	BP	GO:0071506	cellular response to mycophenolic acid	gene10457:106603906, gene18950:106611930	0.0002
80	BP	GO:0048169	regulation of long-term neuronal synapti...	gene10457:106603906, gene18950:106611930, gene22843:106561995, gene28816:106567683, gene34605:106573471	0.00035
81	BP	GO:2000184	positive regulation of progesterone bios...	gene18957:106611923, gene38727:106577610	0.00041
82	BP	GO:0007329	positive regulation of transcription fro...	gene18957:106611923, gene38727:106577610	0.00041
83	BP	GO:0036273	response to statin	gene18957:106611923, gene38727:106577610	0.00041
84	BP	GO:0035634	response to stilbenoid	gene18957:106611923, gene38727:106577610	0.00041
85	BP	GO:0060749	mammary gland alveolus development	gene26108:106565139, gene26826:106565979, gene28441:106567289, gene6530:106599739	0.00051
86	BP	GO:0048133	male germ-line stem cell asymmetric divi...	gene10188:106603639, gene28770:106567727	0.0007
87	BP	GO:1901860	positive regulation of mitochondrial DNA...	gene18957:106611923, gene38727:106577610	0.0007
88	BP	GO:1901558	response to metformin	gene18957:106611923, gene38727:106577610	0.0007
89	BP	GO:0051552	flavone metabolic process	gene18957:106611923, gene38727:106577610	0.00087
90	BP	GO:0040015	negative regulation of multicellular org...	gene26108:106565139, gene26826:106565979, gene28441:106567289	0.00088
91	BP	GO:0007568	aging	gene14257:106607467, gene18767:106611738, gene18957:106611923, gene20824:106613792, gene24057:106563294, gene26108:106565139, gene26826:106565979, gene28441:106567289, gene32174:106571028, gene37891:106576803, gene38727:106577610, gene39631:106578540, gene44237:106583131, gene50557:106588986, gene816:106601984	0.00097
92	BP	GO:0006012	galactose metabolic process	gene18957:106611923, gene38727:106577610, gene48141:106586902	0.00101
93	BP	GO:0060059	embryonic retina morphogenesis in camera...	gene10457:106603906, gene18950:106611930, gene28545:100196802	0.00101
94	BP	GO:0060501	positive regulation of epithelial cell p...	gene16077:106609245, gene2715:106567959, gene29323:106568156	0.00101
95	BP	GO:0072262	metanephric glomerular mesangial cell pr...	gene10457:106603906, gene18950:106611930	0.00107
96	BP	GO:0072126	positive regulation of glomerular mesang...	gene10457:106603906, gene18950:106611930	0.00128
97	BP	GO:0007479	leg disc proximal/distal pattern formati...	gene15093:106608273, gene25538:106564658	0.0015
98	BP	GO:0071250	cellular response to nitrite	gene18957:106611923, gene38727:106577610	0.0015
99	BP	GO:0002042	cell migration involved in sprouting ang...	gene10457:106603906, gene15093:106608273, gene18950:106611930, gene22701:106561865	0.00158
100	BP	GO:0045600	positive regulation of fat cell differen...	gene10188:106603639, gene28770:106567727, gene3746:106578085, gene39631:106578540, gene71096:106592036	0.00167
101	BP	GO:0071774	response to fibroblast growth factor	gene10457:106603906, gene13412:106606792, gene15093:106608273, gene18950:106611930, gene20824:106613792, gene22457:106561638, gene22974:106562111, gene25235:100195092, gene2715:106567959, gene29323:106568156, gene39631:106578540, gene5056:106590650, gene7265:106600850	0.00177
102	BP	GO:0002931	response to ischemia	gene18957:106611923, gene22701:106561865, gene38727:106577610, gene4714:106587516	0.0018
103	BP	GO:0060667	branch elongation involved in salivary g...	gene2715:106567959, gene29323:106568156	0.00201
104	BP	GO:0060615	mammary gland bud formation	gene2715:106567959, gene29323:106568156	0.00201
105	BP	GO:0071603	endothelial cell-cell adhesion	gene37891:106576803, gene3980:106580063	0.00201
106	BP	GO:0060915	mesenchymal cell differentiation involve...	gene2715:106567959, gene29323:106568156	0.00201
107	BP	GO:0072300	positive regulation of metanephric glome...	gene10457:106603906, gene18950:106611930	0.00201
108	BP	GO:0060595	fibroblast growth factor receptor signal...	gene2715:106567959, gene29323:106568156	0.00201
109	BP	GO:0071398	cellular response to fatty acid	gene18767:106611738, gene18957:106611923, gene38727:106577610, gene39631:106578540, gene7265:106600850	0.00209
110	BP	GO:0010463	mesenchymal cell proliferation	gene16077:106609245, gene22457:106561638, gene2715:106567959, gene29323:106568156, gene6530:106599739	0.00223
111	BP	GO:0021627	olfactory nerve morphogenesis	gene18791:106611717, gene2715:106567959	0.00229
112	BP	GO:0071317	cellular response to isoquinoline alkalo...	gene10457:106603906, gene18950:106611930	0.00229
113	BP	GO:0071345	cellular response to cytokine stimulus	gene10457:106603906, gene18767:106611738, gene18950:106611930, gene18957:106611923, gene22701:106561865, gene22974:106562111, gene25803:106564804, gene26108:106565139, gene26826:106565979, gene28441:106567289, gene29763:100195489, gene30144:106568821, gene30785:106569679, gene3746:106578085, gene37891:106576803, gene38727:106577610, gene6530:106599739, gene9916:106603240	0.00231
114	BP	GO:0031069	hair follicle morphogenesis	gene15778:106608879, gene2715:106567959, gene29323:106568156, gene6530:106599739	0.00237
115	BP	GO:0097067	cellular response to thyroid hormone sti...	gene18957:106611923, gene38727:106577610, gene43271:106582091	0.00249
116	BP	GO:0071332	cellular response to fructose stimulus	gene18957:106611923, gene38727:106577610	0.00259
117	BP	GO:0051138	positive regulation of NK T cell differe...	gene10188:106603639, gene28770:106567727	0.00259
118	BP	GO:0071371	cellular response to gonadotropin stimul...	gene10457:106603906, gene18950:106611930, gene18957:106611923, gene28545:100196802, gene37891:106576803, gene38727:106577610	0.00271
119	BP	GO:0010469	regulation of receptor activity	gene18791:106611717, gene18957:106611923, gene20824:106613792, gene22400:100136366, gene22843:106561995, gene28816:106567683, gene38727:106577610	0.00283
120	BP	GO:0030812	negative regulation of nucleotide catabo...	gene18957:106611923, gene38727:106577610, gene816:106601984	0.00286
121	BP	GO:0032355	response to estradiol	gene18957:106611923, gene26108:106565139, gene26826:106565979, gene28441:106567289, gene29323:106568156, gene37891:106576803, gene38727:106577610, gene41882:106580735	0.00287
122	BP	GO:0035026	leading edge cell differentiation	gene25416:106564566, gene25538:106564658	0.0029
123	BP	GO:0071504	cellular response to heparin	gene10457:106603906, gene18950:106611930	0.0029
124	BP	GO:0043201	response to leucine	gene18957:106611923, gene38727:106577610	0.0029
125	BP	GO:2000507	positive regulation of energy homeostasi...	gene18957:106611923, gene38727:106577610	0.0029
126	BP	GO:0070374	positive regulation of ERK1 and ERK2 cas...	gene22457:106561638, gene22701:106561865, gene22974:106562111, gene25416:106564566, gene2715:106567959, gene29323:106568156, gene41882:106580735	0.00298
127	BP	GO:0060665	regulation of branching involved in sali...	gene2715:106567959, gene29323:106568156	0.00324
128	BP	GO:0002021	response to dietary excess	gene18957:106611923, gene38727:106577610, gene41227:106579972	0.00326
129	BP	GO:0034465	response to carbon monoxide	gene10457:106603906, gene18950:106611930	0.00359
130	BP	GO:0014878	response to electrical stimulus involved...	gene18957:106611923, gene38727:106577610	0.00359
131	BP	GO:0009749	response to glucose	gene10457:106603906, gene18950:106611930, gene18957:106611923, gene22400:100136366, gene30144:106568821, gene38727:106577610, gene50557:106588986, gene71096:106592036, gene7265:106600850	0.00373
132	BP	GO:0019932	second-messenger-mediated signaling	gene13954:106607159, gene18791:106611717, gene22701:106561865, gene30144:106568821, gene30785:106569679, gene3746:106578085, gene39631:106578540, gene7265:106600850, gene9916:106603240	0.00426
133	BP	GO:1901857	positive regulation of cellular respirat...	gene18957:106611923, gene38727:106577610	0.00433
134	BP	GO:0045672	positive regulation of osteoclast differ...	gene32174:106571028, gene38727:106577610, gene39631:106578540	0.0045
135	BP	GO:0051384	response to glucocorticoid	gene16874:106609958, gene20824:106613792, gene25416:106564566, gene28816:106567683, gene32174:106571028, gene37891:106576803, gene38727:106577610	0.00455
136	BP	GO:1900543	negative regulation of purine nucleotide...	gene18957:106611923, gene38727:106577610, gene816:106601984, gene9916:106603240	0.00468
137	BP	GO:2001171	positive regulation of ATP biosynthetic ...	gene18957:106611923, gene38727:106577610	0.00473
138	BP	GO:0033233	regulation of protein sumoylation	gene10457:106603906, gene18339:106611380, gene18950:106611930	0.00503
139	BP	GO:0048371	lateral mesodermal cell differentiation	gene2715:106567959, gene6530:106599739	0.00515
140	BP	GO:1900034	regulation of cellular response to heat	gene26209:106565346, gene32862:100380418, gene44582:100196052, gene7092:106600736	0.00526
141	BP	GO:0051196	regulation of coenzyme metabolic process	gene17920:106611031, gene18957:106611923, gene38727:106577610, gene7265:106600850	0.0055
142	BP	GO:0090023	positive regulation of neutrophil chemot...	gene29763:100195489, gene3980:106580063, gene43924:106582757	0.006
143	BP	GO:0042664	negative regulation of endodermal cell f...	gene2715:106567959, gene28553:106567483	0.00603
144	BP	GO:0071313	cellular response to caffeine	gene18957:106611923, gene38727:106577610	0.00603
145	BP	GO:0046677	response to antibiotic	gene10457:106603906, gene18950:106611930, gene32862:100380418, gene37891:106576803	0.0064
146	BP	GO:0071277	cellular response to calcium ion	gene18339:106611380, gene25416:106564566, gene32174:106571028, gene41227:106579972	0.00682
147	BP	GO:0061548	ganglion development	gene22843:106561995, gene34605:106573471, gene37891:106576803	0.00684
148	BP	GO:0035994	response to muscle stretch	gene18791:106611717, gene25416:106564566, gene32174:106571028	0.00684
149	BP	GO:0097120	receptor localization to synapse	gene22843:106561995, gene34605:106573471	0.00697
150	BP	GO:0010359	regulation of anion channel activity	gene22400:100136366, gene4714:106587516	0.00697
151	BP	GO:0071455	cellular response to hyperoxia	gene10457:106603906, gene18950:106611930	0.00697
152	BP	GO:0033089	positive regulation of T cell differenti...	gene10457:106603906, gene18950:106611930	0.00697
153	BP	GO:0048662	negative regulation of smooth muscle cel...	gene18957:106611923, gene38727:106577610, gene41882:106580735	0.00729
154	BP	GO:0043065	positive regulation of apoptotic process	gene10188:106603639, gene10457:106603906, gene13602:106606840, gene14645:106607825, gene18950:106611930, gene18957:106611923, gene22974:106562111, gene24824:106563956, gene25803:106564804, gene2707:106568012, gene28770:106567727, gene37891:106576803, gene38727:106577610, gene39631:106578540, gene40588:106579464, gene43924:106582757, gene816:106601984	0.00742
155	BP	GO:0048701	embryonic cranial skeleton morphogenesis	gene10457:106603906, gene18950:106611930, gene23290:106562437, gene2715:106567959, gene28545:100196802	0.00778
156	BP	GO:0071896	protein localization to adherens junctio...	gene25538:106564658, gene36296:106575175	0.00797
157	BP	GO:0035767	endothelial cell chemotaxis	gene10457:106603906, gene18950:106611930, gene22457:106561638	0.00799
158	BP	GO:0071375	cellular response to peptide hormone sti...	gene10457:106603906, gene18950:106611930, gene20824:106613792, gene22457:106561638, gene24198:106563184, gene26108:106565139, gene26826:106565979, gene2715:106567959, gene28441:106567289, gene29156:106567763, gene29323:106568156, gene39631:106578540, gene7265:106600850	0.00806
159	BP	GO:0030334	regulation of cell migration	gene15093:106608273, gene18767:106611738, gene18957:106611923, gene22457:106561638, gene22701:106561865, gene25416:106564566, gene25538:106564658, gene29323:106568156, gene29763:100195489, gene30785:106569679, gene33543:106572414, gene3746:106578085, gene37891:106576803, gene38727:106577610, gene3980:106580063, gene41906:106580757, gene43271:106582091, gene43924:106582757, gene6530:106599739, gen…	0.00816
160	BP	GO:1900449	regulation of glutamate receptor signali...	gene18957:106611923, gene22843:106561995, gene38727:106577610	0.00823
161	BP	GO:0018208	peptidyl-proline modification	gene26209:106565346, gene44582:100196052, gene816:106601984	0.00823
162	BP	GO:0060430	lung saccule development	gene29323:106568156, gene39631:106578540	0.0085
163	BP	GO:0046426	negative regulation of JAK-STAT cascade	gene26108:106565139, gene26826:106565979, gene28441:106567289	0.00873
164	BP	GO:0071415	cellular response to purine-containing c...	gene18767:106611738, gene18957:106611923, gene38727:106577610	0.00879
165	BP	GO:0070098	chemokine-mediated signaling pathway	gene22701:106561865, gene29763:100195489, gene3746:106578085	0.00899
166	BP	GO:0061418	regulation of transcription from RNA pol...	gene10457:106603906, gene18950:106611930, gene816:106601984	0.00899
167	BP	GO:0044708	single-organism behavior	gene10457:106603906, gene14257:106607467, gene15093:106608273, gene16077:106609245, gene18950:106611930, gene22843:106561995, gene25538:106564658, gene28692:106567574, gene28816:106567683, gene32174:106571028, gene34605:106573471, gene39631:106578540, gene3980:106580063, gene61616:106594092	0.00902
168	BP	GO:0060664	epithelial cell proliferation involved i...	gene2715:106567959, gene29323:106568156	0.00904
169	BP	GO:0035865	cellular response to potassium ion	gene18957:106611923, gene38727:106577610	0.00904
170	BP	GO:0060449	bud elongation involved in lung branchin...	gene2715:106567959, gene29323:106568156	0.00959
171	BP	GO:0050890	cognition	gene10457:106603906, gene11499:106604864, gene14257:106607467, gene16077:106609245, gene18950:106611930, gene22843:106561995, gene25538:106564658, gene32174:106571028, gene34605:106573471, gene39631:106578540	0.00982
172	BP	GO:0010837	regulation of keratinocyte proliferation	gene14257:106607467, gene15778:106608879, gene29323:106568156	0.01005
173	BP	GO:0014812	muscle cell migration	gene18767:106611738, gene18957:106611923, gene37891:106576803, gene38727:106577610, gene3980:106580063	0.0105
174	BP	GO:0008306	associative learning	gene22843:106561995, gene25538:106564658, gene32174:106571028, gene34605:106573471, gene39631:106578540	0.0105
175	BP	GO:2000401	regulation of lymphocyte migration	gene29763:100195489, gene30785:106569679, gene43271:106582091	0.01061
176	BP	GO:0070498	interleukin-1-mediated signaling pathway	gene10457:106603906, gene18950:106611930	0.01075
177	BP	GO:0007298	border follicle cell migration	gene14257:106607467, gene15093:106608273, gene25538:106564658	0.0109
178	BP	GO:0060396	growth hormone receptor signaling pathwa...	gene26108:106565139, gene26826:106565979, gene28441:106567289	0.01119
179	BP	GO:0006090	pyruvate metabolic process	gene17920:106611031, gene18957:106611923, gene38727:106577610, gene4714:106587516, gene7265:106600850	0.01123
180	BP	GO:0034764	positive regulation of transmembrane tra...	gene14257:106607467, gene18047:106611136, gene18339:106611380, gene18791:106611717, gene22400:100136366, gene7265:106600850	0.01129
181	BP	GO:0071383	cellular response to steroid hormone sti...	gene10457:106603906, gene18950:106611930, gene18957:106611923, gene37891:106576803, gene38727:106577610, gene41882:106580735, gene43271:106582091, gene44582:100196052, gene816:106601984	0.01138
182	BP	GO:0001655	urogenital system development	gene10188:106603639, gene10457:106603906, gene18047:106611136, gene18950:106611930, gene22974:106562111, gene23290:106562437, gene24057:106563294, gene25538:106564658, gene2715:106567959, gene28770:106567727, gene28816:106567683, gene29323:106568156, gene44582:100196052, gene6530:106599739	0.01188
183	BP	GO:0032808	lacrimal gland development	gene2715:106567959, gene29323:106568156	0.01196
184	BP	GO:0035215	genital disc development	gene15093:106608273, gene25538:106564658	0.01196
185	BP	GO:0007297	ovarian follicle cell migration	gene14257:106607467, gene15093:106608273, gene25538:106564658	0.01209
186	BP	GO:0050806	positive regulation of synaptic transmis...	gene10457:106603906, gene14257:106607467, gene18950:106611930, gene22843:106561995, gene34605:106573471, gene39631:106578540	0.01231
187	BP	GO:0071378	cellular response to growth hormone stim...	gene26108:106565139, gene26826:106565979, gene28441:106567289	0.0124
188	BP	GO:0046939	nucleotide phosphorylation	gene14257:106607467, gene17920:106611031, gene18957:106611923, gene38727:106577610, gene4714:106587516	0.01247
189	BP	GO:0099515	actin filament-based transport	gene41046:106580130, gene41906:106580757	0.01259
190	BP	GO:0048264	determination of ventral identity	gene15093:106608273, gene28553:106567483	0.01323
191	BP	GO:0035088	establishment or maintenance of apical/b...	gene25538:106564658, gene33543:106572414, gene43271:106582091, gene6530:106599739	0.01349
192	BP	GO:0061245	establishment or maintenance of bipolar ...	gene25538:106564658, gene33543:106572414, gene43271:106582091, gene6530:106599739	0.01349
193	BP	GO:0048557	embryonic digestive tract morphogenesis	gene2715:106567959, gene29323:106568156, gene6530:106599739	0.01368
194	BP	GO:0009826	unidimensional cell growth	gene22457:106561638, gene25538:106564658, gene42294:106581151	0.01368
195	BP	GO:0048703	embryonic viscerocranium morphogenesis	gene10457:106603906, gene18950:106611930, gene28545:100196802	0.01368
196	BP	GO:0061383	trabecula morphogenesis	gene15093:106608273, gene38727:106577610, gene3980:106580063, gene816:106601984	0.01371
197	BP	GO:0002064	epithelial cell development	gene14257:106607467, gene1493:106609599, gene15093:106608273, gene18791:106611717, gene25538:106564658, gene2715:106567959, gene41882:106580735, gene43271:106582091, gene7265:106600850, gene9916:106603240	0.01381
198	BP	GO:0006198	cAMP catabolic process	gene816:106601984, gene9916:106603240	0.01389
199	BP	GO:0060537	muscle tissue development	gene10457:106603906, gene14645:106607825, gene15093:106608273, gene16077:106609245, gene18791:106611717, gene18950:106611930, gene18957:106611923, gene2715:106567959, gene28692:106567574, gene32174:106571028, gene38727:106577610, gene6530:106599739, gene816:106601984	0.0142
200	BP	GO:0071480	cellular response to gamma radiation	gene10457:106603906, gene18950:106611930	0.01456
201	BP	GO:0006457	protein folding	gene17920:106611031, gene18991:106611988, gene26209:106565346, gene32862:100380418, gene44582:100196052, gene7092:106600736	0.01498
202	BP	GO:0002066	columnar/cuboidal epithelial cell develo...	gene14257:106607467, gene1493:106609599, gene15093:106608273, gene25538:106564658, gene2715:106567959, gene7265:106600850	0.01498
203	BP	GO:0051385	response to mineralocorticoid	gene25416:106564566, gene28816:106567683, gene32174:106571028	0.01503
204	BP	GO:0031128	developmental induction	gene23290:106562437, gene2715:106567959, gene29323:106568156	0.01503
205	BP	GO:0001678	cellular glucose homeostasis	gene18957:106611923, gene22400:100136366, gene38727:106577610, gene4714:106587516, gene71096:106592036, gene7265:106600850	0.01529
206	BP	GO:0007611	learning or memory	gene10457:106603906, gene14257:106607467, gene16077:106609245, gene18950:106611930, gene22843:106561995, gene25538:106564658, gene32174:106571028, gene34605:106573471, gene39631:106578540	0.01544
207	BP	GO:0006110	regulation of glycolytic process	gene17920:106611031, gene18957:106611923, gene38727:106577610	0.01574
208	BP	GO:0060343	trabecula formation	gene38727:106577610, gene3980:106580063, gene816:106601984	0.01574
209	BP	GO:0060463	lung lobe morphogenesis	gene2715:106567959, gene6530:106599739	0.01594
210	BP	GO:0060174	limb bud formation	gene2715:106567959, gene29323:106568156	0.01594
211	BP	GO:0001936	regulation of endothelial cell prolifera...	gene10457:106603906, gene15093:106608273, gene18950:106611930, gene25416:106564566, gene3980:106580063	0.01618
212	BP	GO:1901863	positive regulation of muscle tissue dev...	gene18957:106611923, gene2715:106567959, gene28692:106567574, gene38727:106577610	0.01631
213	BP	GO:0042220	response to cocaine	gene10457:106603906, gene18950:106611930, gene25538:106564658	0.01646
214	BP	GO:0046320	regulation of fatty acid oxidation	gene18957:106611923, gene38727:106577610, gene7265:106600850	0.01646
215	BP	GO:0032922	circadian regulation of gene expression	gene18957:106611923, gene28692:106567574, gene38727:106577610, gene39631:106578540	0.01656
216	BP	GO:0000302	response to reactive oxygen species	gene18957:106611923, gene18991:106611988, gene20824:106613792, gene30144:106568821, gene37891:106576803, gene38727:106577610, gene7265:106600850, gene816:106601984	0.0166
217	BP	GO:0060081	membrane hyperpolarization	gene22400:100136366, gene28816:106567683	0.01665
218	BP	GO:0009214	cyclic nucleotide catabolic process	gene816:106601984, gene9916:106603240	0.01665
219	BP	GO:0000266	mitochondrial fission	gene18957:106611923, gene38727:106577610, gene40641:106579534	0.01683
220	BP	GO:0043523	regulation of neuron apoptotic process	gene10457:106603906, gene18950:106611930, gene18957:106611923, gene25416:106564566, gene38727:106577610, gene41882:106580735, gene43813:106582660, gene816:106601984	0.01684
221	BP	GO:0035116	embryonic hindlimb morphogenesis	gene10188:106603639, gene22457:106561638, gene28770:106567727	0.0172
222	BP	GO:0097285	cell-type specific apoptotic process	gene10457:106603906, gene18950:106611930, gene18957:106611923, gene22974:106562111, gene25416:106564566, gene2707:106568012, gene2715:106567959, gene32862:100380418, gene38727:106577610, gene41882:106580735, gene43813:106582660, gene7265:106600850, gene816:106601984	0.01729
223	CC	GO:0016323	basolateral plasma membrane	gene14257:106607467, gene18767:106611738, gene22400:100136366, gene22974:106562111, gene23207:100136926, gene28816:106567683, gene32862:100380418, gene42294:106581151, gene43271:106582091, gene48784:100136916	0.00064
224	CC	GO:0031528	microvillus membrane	gene23207:100136926, gene43271:106582091, gene48784:100136916	0.00122
225	CC	GO:0005719	nuclear euchromatin	gene18957:106611923, gene38727:106577610, gene39357:106578255, gene39631:106578540	0.0013
226	CC	GO:0045177	apical part of cell	gene15778:106608879, gene18767:106611738, gene22400:100136366, gene22843:106561995, gene22974:106562111, gene25538:106564658, gene28816:106567683, gene32862:100380418, gene33543:106572414, gene40618:106579507, gene43271:106582091, gene9916:106603240	0.00324
227	CC	GO:0031527	filopodium membrane	gene18791:106611717, gene41906:106580757, gene43271:106582091	0.00453
228	CC	GO:0005886	plasma membrane	gene10188:106603639, gene14257:106607467, gene15093:106608273, gene16874:106609958, gene17920:106611031, gene18189:106611249, gene18339:106611380, gene18767:106611738, gene18791:106611717, gene20824:106613792, gene22400:100136366, gene22457:106561638, gene22701:106561865, gene22843:106561995, gene22974:106562111, gene23207:100136926, gene24198:106563184, gene25538:106564658, gene25803:106564804, …	0.00484
229	CC	GO:0098793	presynapse	gene14257:106607467, gene18791:106611717, gene24198:106563184, gene30144:106568821, gene36296:106575175, gene41882:106580735, gene42294:106581151, gene61616:106594092, gene9916:106603240	0.00834
230	CC	GO:0000178	exosome (RNase complex)	gene13954:106607159, gene14257:106607467	0.01454
231	CC	GO:0043235	receptor complex	gene22843:106561995, gene22974:106562111, gene25803:106564804, gene26498:106565668, gene2715:106567959, gene30144:106568821, gene34016:106572862	0.01828
232	CC	GO:0042995	cell projection	gene14257:106607467, gene16874:106609958, gene18047:106611136, gene18791:106611717, gene18957:106611923, gene19306:106612291, gene22701:106561865, gene22843:106561995, gene23207:100136926, gene23290:106562437, gene24057:106563294, gene24198:106563184, gene25538:106564658, gene26209:106565346, gene27580:106566494, gene28816:106567683, gene30144:106568821, gene32174:106571028, gene32862:100380418, …	0.01901
233	CC	GO:0016942	insulin-like growth factor binding prote...	gene28193:101448061	0.02166
234	CC	GO:0036454	growth factor complex	gene28193:101448061	0.02166
235	CC	GO:0042567	insulin-like growth factor ternary compl...	gene28193:101448061	0.02166
236	CC	GO:0042568	insulin-like growth factor binary comple...	gene28193:101448061	0.02166
237	CC	GO:0016324	apical plasma membrane	gene18767:106611738, gene22400:100136366, gene22974:106562111, gene25538:106564658, gene28816:106567683, gene32862:100380418, gene43271:106582091, gene9916:106603240	0.02446
238	CC	GO:0031594	neuromuscular junction	gene15093:106608273, gene22701:106561865, gene29156:106567763, gene3980:106580063	0.02742
239	CC	GO:0033267	axon part	gene18791:106611717, gene24198:106563184, gene26209:106565346, gene30144:106568821, gene41882:106580735, gene42294:106581151, gene44582:100196052, gene61616:106594092	0.02937
240	CC	GO:1990622	CHOP-ATF3 complex	gene14645:106607825	0.0302
241	CC	GO:0031205	endoplasmic reticulum Sec complex	gene22400:100136366	0.0302
242	CC	GO:0005902	microvillus	gene19306:106612291, gene23207:100136926, gene28816:106567683, gene33543:106572414, gene43271:106582091, gene48784:100136916	0.03107
243	CC	GO:0030424	axon	gene18047:106611136, gene18791:106611717, gene23290:106562437, gene24198:106563184, gene26209:106565346, gene30144:106568821, gene39631:106578540, gene41882:106580735, gene42294:106581151, gene43813:106582660, gene44582:100196052, gene61616:106594092, gene9916:106603240	0.03212
244	CC	GO:0044459	plasma membrane part	gene14257:106607467, gene15093:106608273, gene16874:106609958, gene18767:106611738, gene18791:106611717, gene20824:106613792, gene22400:100136366, gene22843:106561995, gene22974:106562111, gene23207:100136926, gene25538:106564658, gene25803:106564804, gene2715:106567959, gene27580:106566494, gene28692:106567574, gene28816:106567683, gene29156:106567763, gene29763:100195489, gene30144:106568821, g…	0.03272
245	CC	GO:0043186	P granule	gene13954:106607159, gene29156:106567763	0.03386
246	CC	GO:0060293	germ plasm	gene13954:106607159, gene29156:106567763	0.03386
247	CC	GO:0097440	apical dendrite	gene18957:106611923, gene38727:106577610	0.0348
248	CC	GO:0045495	pole plasm	gene13954:106607159, gene29156:106567763	0.04169
249	CC	GO:0070435	Shc-EGFR complex	gene20824:106613792	0.04286
250	CC	GO:0042734	presynaptic membrane	gene14257:106607467, gene36296:106575175, gene9916:106603240	0.04637
251	CC	GO:0035003	subapical complex	gene15093:106608273	0.04704
252	CC	GO:1990589	ATF4-CREB1 transcription factor complex	gene39631:106578540	0.04704
253	CC	GO:0035061	interchromatin granule	gene44237:106583131	0.04704
254	CC	GO:0072562	blood microparticle	gene22701:106561865, gene43271:106582091, gene7092:106600736	0.04762

## Sheet: T6_SP_GO
X1	Category	ID	Term	Genes	adj_pval
1	MF	GO:0001078	transcriptional repressor activity, RNA ...	gene10527:100136800, gene11900:100136378, gene12439:106605788, gene13852:106607080, gene13951:106607161, gene14213:106607496, gene14776:106607967, gene16077:106609245, gene17688:106610738, gene20799:106613773, gene21752:100136415, gene22999:106562092, gene23369:106562516, gene2377:106564765, gene25381:106564532, gene28427:106567280, gene29552:106568492, gene30708:106569597, gene31696:106570557, g…	2.8e-08
2	MF	GO:0016494	C-X-C chemokine receptor activity	gene12207:106605553, gene29763:100195489, gene42905:106581841, gene47375:100306754, gene51739:106590189, gene5779:106597311, gene6708:106600212	1.7e-05
3	MF	GO:0005158	insulin receptor binding	gene14239:106607477, gene15601:106608778, gene15977:106609064, gene20824:106613792, gene21338:106560529, gene21522:100136550, gene22875:106562068, gene31906:106570769, gene35232:106574153, gene49296:106588073, gene50301:106588785, gene66372:106592162, gene7265:106600850, gene72685:106596240	2.5e-05
4	MF	GO:0005159	insulin-like growth factor receptor bind...	gene15601:106608778, gene15977:106609064, gene20824:106613792, gene21338:106560529, gene21522:100136550, gene26108:106565139, gene26826:106565979, gene28441:106567289, gene49296:106588073, gene66372:106592162	3.1e-05
5	MF	GO:0008134	transcription factor binding	gene10079:106603496, gene1027:106604361, gene10457:106603906, gene10527:100136800, gene10664:106604092, gene10745:106604170, gene10856:106604211, gene11870:100195869, gene11900:100136378, gene12423:106605774, gene13721:106606950, gene13936:106607176, gene13950:106607162, gene13951:106607161, gene13954:106607159, gene14213:106607496, gene14776:106607967, gene15093:106608273, gene15130:106608294, g…	4.2e-05
6	MF	GO:0008144	drug binding	gene10970:106604332, gene14486:106607709, gene21752:100136415, gene26209:106565346, gene29346:106568136, gene31753:106570612, gene38359:106577235, gene40889:106579776, gene41235:106579965, gene42905:106581841, gene44582:100196052, gene45278:106584037, gene46592:106585604, gene47375:100306754, gene47521:106586273, gene48856:106587624, gene53461:106597306, gene6708:106600212, gene8456:106602089, ge…	5.3e-05
7	MF	GO:0000978	RNA polymerase II core promoter proximal...	gene10527:100136800, gene11900:100136378, gene12063:106605451, gene12439:106605788, gene13721:106606950, gene13950:106607162, gene14213:106607496, gene15130:106608294, gene16077:106609245, gene17688:106610738, gene19148:106612139, gene20799:106613773, gene21752:100136415, gene22999:106562092, gene23369:106562516, gene2377:106564765, gene25894:106565042, gene26810:106565962, gene27505:106566425, g…	6.3e-05
8	MF	GO:0020037	heme binding	gene1080:106604807, gene11900:100136378, gene14213:106607496, gene15126:106608296, gene23207:100136926, gene37891:106576803, gene4157:106582110, gene44393:106583179, gene44423:106583303, gene45307:106584062, gene48784:100136916, gene4980:106590030, gene5016:106590330, gene51736:106590187, gene68650:106593961, gene7293:106600825	0.00014
9	MF	GO:0004888	transmembrane signaling receptor activit...	gene10970:106604332, gene12207:106605553, gene13172:106606520, gene13469:106606823, gene14333:106607549, gene14486:106607709, gene14611:106607799, gene16790:106609880, gene16874:106609958, gene18767:106611738, gene21752:100136415, gene22012:106561177, gene22911:106562160, gene22974:106562111, gene23957:106563139, gene24093:106563265, gene26498:106565668, gene2715:106567959, gene27412:106566362, g…	0.00017
10	MF	GO:0016712	oxidoreductase activity, acting on paire...	gene1080:106604807, gene23207:100136926, gene37891:106576803, gene45307:106584062, gene48784:100136916, gene51736:106590187	0.00018
11	MF	GO:0004839	ubiquitin activating enzyme activity	gene34106:106572961, gene34114:106572968, gene34117:106572971, gene78436:106594316	0.00022
12	MF	GO:0035035	histone acetyltransferase binding	gene10457:106603906, gene12439:106605788, gene13721:106606950, gene13950:106607162, gene20799:106613773, gene28336:100194884, gene29552:106568492, gene33633:106572480, gene39631:106578540, gene51273:106589722, gene71293:106594275, gene7609:106601241	0.00059
13	MF	GO:0003714	transcription corepressor activity	gene10664:106604092, gene10856:106604211, gene11900:100136378, gene12283:106605616, gene13852:106607080, gene13936:106607176, gene13951:106607161, gene14213:106607496, gene16217:106609271, gene18944:106611936, gene22237:106561392, gene22904:106562167, gene2377:106564765, gene25381:106564532, gene28999:106567892, gene30708:106569597, gene31761:106570628, gene32601:106571544, gene3772:106577891, ge…	0.00062
14	MF	GO:0015171	amino acid transmembrane transporter act...	gene15708:106608835, gene16405:106609517, gene16406:106609518, gene18662:106611663, gene19948:106612936, gene27233:106566182, gene27580:106566494, gene31698:106570559, gene37490:100306766, gene3906:106579373, gene43895:106582726, gene44917:100194771, gene52133:106590589	0.00079
15	MF	GO:0043548	phosphatidylinositol 3-kinase binding	gene15601:106608778, gene15977:106609064, gene21338:106560529, gene23833:106562976, gene29582:106568503, gene36161:106575127, gene41882:106580735, gene43220:106582130, gene47911:106586664, gene49296:106588073, gene66372:106592162, gene8765:106602328	0.00099
16	MF	GO:0005328	neurotransmitter:sodium symporter activi...	gene27233:106566182, gene27580:106566494, gene3906:106579373, gene44917:100194771, gene8456:106602089, gene8475:106602109	0.00112
17	MF	GO:0001222	transcription corepressor binding	gene11900:100136378, gene13936:106607176, gene14213:106607496, gene4157:106582110, gene44423:106583303, gene6759:106600026, gene7293:106600825	0.00114
18	MF	GO:0050682	AF-2 domain binding	gene1027:106604361, gene15578:106608616, gene17688:106610738, gene38727:106577610	0.00125
19	MF	GO:0008081	phosphoric diester hydrolase activity	gene10012:106603555, gene14878:106608063, gene26385:106565592, gene35671:106574566, gene39308:106578207, gene43038:106581900, gene43885:106582617, gene45278:106584037, gene4980:106590030, gene5016:106590330, gene53461:106597306, gene67436:106592886, gene9916:106603240	0.00169
20	MF	GO:0001013	RNA polymerase I regulatory region DNA b...	gene28336:100194884, gene30398:100196464, gene33633:106572480	0.00183
21	MF	GO:0004871	signal transducer activity	gene10549:106603990, gene10970:106604332, gene11179:106604533, gene11900:100136378, gene12207:106605553, gene13172:106606520, gene13405:106606801, gene13469:106606823, gene14213:106607496, gene1426:106609185, gene14333:106607549, gene14486:106607709, gene14611:106607799, gene14878:106608063, gene15601:106608778, gene15977:106609064, gene16790:106609880, gene16874:106609958, gene17148:100380732, g…	0.00197
22	MF	GO:0031625	ubiquitin protein ligase binding	gene1027:106604361, gene12863:106606205, gene15578:106608616, gene18957:106611923, gene19986:106613013, gene20633:106613622, gene21316:106560503, gene21338:106560529, gene21595:106560763, gene23183:106562338, gene23625:106562779, gene23866:106563080, gene2536:106566762, gene25803:106564804, gene2731:106568345, gene28159:106567054, gene28520:106567411, gene28692:106567574, gene30097:100301980, gen…	0.00198
23	MF	GO:0000979	RNA polymerase II core promoter sequence...	gene10457:106603906, gene10856:106604211, gene13852:106607080, gene15130:106608294, gene22999:106562092, gene25381:106564532, gene26276:106565395, gene42734:106581582, gene48548:106587185, gene48573:106587332, gene48856:106587624, gene49103:106587875, gene4931:106589539, gene7530:106601159, gene7693:106601356	0.00216
24	MF	GO:0001077	transcriptional activator activity, RNA ...	gene10457:106603906, gene10527:100136800, gene12423:106605774, gene12439:106605788, gene13721:106606950, gene13936:106607176, gene13950:106607162, gene15093:106608273, gene15130:106608294, gene17688:106610738, gene19148:106612139, gene20799:106613773, gene21752:100136415, gene22999:106562092, gene26276:106565395, gene26810:106565962, gene27505:106566425, gene28336:100194884, gene28553:106567483, …	0.00245
25	MF	GO:0001664	G-protein coupled receptor binding	gene10487:106603933, gene10970:106604332, gene11179:106604533, gene18767:106611738, gene19986:106613013, gene20229:106613218, gene20633:106613622, gene22776:100136362, gene23866:106563080, gene23906:106563047, gene2424:106565855, gene2731:106568345, gene27768:106566609, gene28506:106567400, gene34008:106572869, gene35242:106574143, gene38359:106577235, gene3922:106579439, gene39308:106578207, gen…	0.00264
26	MF	GO:0001047	core promoter binding	gene10457:106603906, gene10856:106604211, gene11900:100136378, gene13852:106607080, gene13936:106607176, gene14213:106607496, gene14776:106607967, gene15130:106608294, gene1922:106560215, gene21150:106560326, gene22999:106562092, gene23183:106562338, gene23340:106562490, gene25381:106564532, gene26276:106565395, gene29145:106567770, gene30887:106569767, gene39631:106578540, gene4157:106582110, ge…	0.00276
27	MF	GO:0015020	glucuronosyltransferase activity	gene22757:106561911, gene27670:106566571, gene31066:106570050, gene35567:106574555, gene49070:106587841, gene68005:106593150, gene6859:106600605, gene70325:106593181	0.00412
28	MF	GO:0042803	protein homodimerization activity	gene10188:106603639, gene10487:106603933, gene10527:100136800, gene10970:106604332, gene12283:106605616, gene12439:106605788, gene13721:106606950, gene13950:106607162, gene14239:106607477, gene16077:106609245, gene18047:106611136, gene1851:106611671, gene18944:106611936, gene20799:106613773, gene22904:106562167, gene23833:106562976, gene23906:106563047, gene26712:106565791, gene26757:106565748, g…	0.00436
29	MF	GO:0030331	estrogen receptor binding	gene1027:106604361, gene10856:106604211, gene15578:106608616, gene18957:106611923, gene19414:106612392, gene21338:106560529, gene23047:106562220, gene38727:106577610, gene40889:106579776, gene46613:100196040, gene57322:106591773, gene80503:106591314	0.00457
30	MF	GO:0030911	TPR domain binding	gene32862:100380418, gene53461:106597306, gene8303:106601937, gene9916:106603240	0.00469
31	MF	GO:0031995	insulin-like growth factor II binding	gene21210:101448057, gene4678:100194498, gene49296:106588073, gene66372:106592162	0.00469
32	MF	GO:0015293	symporter activity	gene16405:106609517, gene16406:106609518, gene19948:106612936, gene24359:106563433, gene27233:106566182, gene27580:106566494, gene2979:100136908, gene30307:106569207, gene32438:100194525, gene37490:100306766, gene3906:106579373, gene43895:106582726, gene44404:106583168, gene44917:100194771, gene47866:106586629, gene8456:106602089, gene8475:106602109	0.00484
33	MF	GO:0003705	transcription factor activity, RNA polym...	gene10188:106603639, gene12283:106605616, gene15093:106608273, gene20799:106613773, gene22999:106562092, gene26276:106565395, gene28336:100194884, gene28427:106567280, gene28770:106567727, gene29552:106568492, gene30398:100196464, gene33633:106572480, gene3772:106577891, gene39631:106578540, gene41894:100136356, gene43593:100136911, gene43823:106582669, gene46613:100196040, gene48548:106587185, g…	0.00492
34	MF	GO:0035240	dopamine binding	gene10970:106604332, gene46592:106585604, gene47850:106586618	0.005
35	MF	GO:0035757	chemokine (C-C motif) ligand 19 binding	gene29763:100195489, gene51739:106590189, gene5779:106597311	0.005
36	MF	GO:0035758	chemokine (C-C motif) ligand 21 binding	gene29763:100195489, gene51739:106590189, gene5779:106597311	0.005
37	MF	GO:0038121	C-C motif chemokine 21 receptor activity	gene29763:100195489, gene51739:106590189, gene5779:106597311	0.005
38	MF	GO:0038117	C-C motif chemokine 19 receptor activity	gene29763:100195489, gene51739:106590189, gene5779:106597311	0.005
39	MF	GO:0005451	monovalent cation:proton antiporter acti...	gene11802:106605147, gene35081:106573936, gene47988:106586777	0.005
40	MF	GO:0051019	mitogen-activated protein kinase binding	gene14878:106608063, gene22999:106562092, gene29251:106568203, gene3025:106571505, gene45561:106584319, gene45864:106584595, gene48548:106587185, gene48856:106587624, gene50434:106588860, gene67436:106592886	0.00519
41	MF	GO:0003707	steroid hormone receptor activity	gene11900:100136378, gene14213:106607496, gene17688:106610738, gene21752:100136415, gene40176:106579329, gene4157:106582110, gene41882:106580735, gene44423:106583303, gene46613:100196040, gene7293:106600825	0.00519
42	MF	GO:0019900	kinase binding	gene10549:106603990, gene11179:106604533, gene12863:106606205, gene13936:106607176, gene13951:106607161, gene14239:106607477, gene14257:106607467, gene14776:106607967, gene14878:106608063, gene15601:106608778, gene15977:106609064, gene18791:106611717, gene19475:106612460, gene20824:106613792, gene21015:106613957, gene21338:106560529, gene21564:106560790, gene21770:106560977, gene21822:106560921, …	0.00681
43	MF	GO:0031072	heat shock protein binding	gene18991:106611988, gene19986:106613013, gene26209:106565346, gene2866:106569712, gene29145:106567770, gene34008:106572869, gene39631:106578540, gene40889:106579776, gene43593:100136911, gene43885:106582617, gene44582:100196052, gene46412:106585059, gene50434:106588860, gene51273:106589722, gene51815:106590294, gene5189:106591679, gene7385:106601018, gene771:106601178, gene80:106599806, gene8303…	0.0074
44	MF	GO:0004725	protein tyrosine phosphatase activity	gene2341:106564343, gene25948:106565282, gene27286:106566241, gene29251:106568203, gene29582:106568503, gene30144:106568821, gene31906:106570769, gene34283:106573116, gene35232:106574153, gene45864:106584595, gene51900:106590348, gene52198:106590661, gene72685:106596240	0.00793
45	MF	GO:0035591	signaling adaptor activity	gene15601:106608778, gene17148:100380732, gene20824:106613792, gene21338:106560529, gene23833:106562976, gene23906:106563047, gene26108:106565139, gene28441:106567289, gene37138:106576039, gene38985:106577881, gene4072:106581016, gene43141:106581983, gene44392:106583180, gene50301:106588785, gene57355:106592182	0.00852
46	MF	GO:0004887	thyroid hormone receptor activity	gene14213:106607496, gene40176:106579329, gene4157:106582110, gene7293:106600825	0.00891
47	MF	GO:0017017	MAP kinase tyrosine/serine/threonine pho...	gene2341:106564343, gene27286:106566241, gene29251:106568203, gene33222:106572218, gene34283:106573116, gene37862:106576825	0.00898
48	MF	GO:0017046	peptide hormone binding	gene21338:106560529, gene30436:106569329, gene39308:106578207, gene41770:100196588, gene4338:106583575, gene44744:106583415, gene49296:106588073, gene6589:106599896, gene66372:106592162	0.00963
49	MF	GO:0015932	nucleobase-containing compound transmemb...	gene10487:106603933, gene19122:106612116, gene20142:106613130, gene24195:106563187, gene32438:100194525, gene38644:106577545, gene41227:106579972, gene50748:106589263	0.00977
50	MF	GO:0035326	enhancer binding	gene10188:106603639, gene12063:106605451, gene12283:106605616, gene17688:106610738, gene22999:106562092, gene26276:106565395, gene28770:106567727, gene30398:100196464, gene3772:106577891, gene39631:106578540, gene4000:106580205, gene41882:106580735, gene42596:106581451, gene42916:106581833, gene43566:106582401, gene43593:100136911, gene48548:106587185, gene48856:106587624, gene49103:106587875, ge…	0.00977
51	MF	GO:0046935	1-phosphatidylinositol-3-kinase regulato...	gene21338:106560529, gene25518:106564678, gene4771:106587077	0.01024
52	MF	GO:0031699	beta-3 adrenergic receptor binding	gene20633:106613622, gene23866:106563080, gene2731:106568345	0.01024
53	MF	GO:0030946	protein tyrosine phosphatase activity, m...	gene25948:106565282, gene52198:106590661	0.01041
54	MF	GO:0070379	high mobility group box 1 binding	gene15093:106608273, gene497:106589077	0.01041
55	MF	GO:0050809	diazepam binding	gene8456:106602089, gene8475:106602109	0.01041
56	MF	GO:0001102	RNA polymerase II activating transcripti...	gene10079:106603496, gene10527:100136800, gene22237:106561392, gene23183:106562338, gene23243:106562395, gene31696:106570557, gene39631:106578540, gene45005:106583767, gene46608:106585589, gene49103:106587875, gene7530:106601159	0.01047
57	MF	GO:0015215	nucleotide transmembrane transporter act...	gene10487:106603933, gene19122:106612116, gene20142:106613130, gene24195:106563187, gene32438:100194525, gene41227:106579972, gene50748:106589263	0.01088
58	MF	GO:0098531	transcription factor activity, direct li...	gene11900:100136378, gene14213:106607496, gene17688:106610738, gene21752:100136415, gene40176:106579329, gene4157:106582110, gene41882:106580735, gene43593:100136911, gene44423:106583303, gene46613:100196040, gene51815:106590294, gene6759:106600026, gene7293:106600825	0.01247
59	MF	GO:0004879	RNA polymerase II transcription factor a...	gene11900:100136378, gene14213:106607496, gene17688:106610738, gene21752:100136415, gene40176:106579329, gene4157:106582110, gene41882:106580735, gene43593:100136911, gene44423:106583303, gene46613:100196040, gene51815:106590294, gene6759:106600026, gene7293:106600825	0.01247
60	MF	GO:0047555	3',5'-cyclic-GMP phosphodiesterase activ...	gene43038:106581900, gene53461:106597306, gene9916:106603240	0.01249
61	MF	GO:0004630	phospholipase D activity	gene35671:106574566, gene4980:106590030, gene5016:106590330	0.01249
62	MF	GO:0015026	coreceptor activity	gene40719:100136506, gene42905:106581841, gene43552:106582391, gene47375:100306754, gene6708:106600212	0.01254
63	MF	GO:0030674	protein binding, bridging	gene11802:106605147, gene12957:106606308, gene13787:106607014, gene1426:106609185, gene15601:106608778, gene17148:100380732, gene20824:106613792, gene21338:106560529, gene26108:106565139, gene26209:106565346, gene27768:106566609, gene28441:106567289, gene33543:106572414, gene34595:106573459, gene37138:106576039, gene38985:106577881, gene4000:106580205, gene4072:106581016, gene43141:106581983, gen…	0.01264
64	MF	GO:0055131	C3HC4-type RING finger domain binding	gene19986:106613013, gene34008:106572869, gene42916:106581833, gene7385:106601018	0.01334
65	MF	GO:0030346	protein phosphatase 2B binding	gene11802:106605147, gene29156:106567763, gene29346:106568136, gene47988:106586777	0.01334
66	MF	GO:0072349	modified amino acid transmembrane transp...	gene24359:106563433, gene27580:106566494, gene35582:106574544, gene36405:106575314	0.01334
67	MF	GO:0015101	organic cation transmembrane transporter...	gene15708:106608835, gene18047:106611136, gene217:106560243, gene31698:106570559	0.01334
68	MF	GO:0019958	C-X-C chemokine binding	gene12207:106605553, gene29763:100195489, gene51739:106590189, gene5779:106597311	0.01334
69	MF	GO:0019198	transmembrane receptor protein phosphata...	gene30144:106568821, gene33222:106572218, gene35232:106574153, gene37862:106576825, gene45864:106584595, gene51900:106590348, gene72685:106596240	0.01341
70	MF	GO:0015296	anion:cation symporter activity	gene19948:106612936, gene27233:106566182, gene27580:106566494, gene2979:100136908, gene30307:106569207, gene44404:106583168, gene44917:100194771	0.01341
71	MF	GO:0005086	ARF guanyl-nucleotide exchange factor ac...	gene19122:106612116, gene27776:106566761, gene28381:106567312, gene33354:106572111, gene50748:106589263	0.01381
72	MF	GO:0005332	gamma-aminobutyric acid:sodium symporter...	gene27233:106566182, gene27580:106566494, gene44917:100194771	0.01499
73	MF	GO:0015185	gamma-aminobutyric acid transmembrane tr...	gene27233:106566182, gene27580:106566494, gene44917:100194771	0.01499
74	MF	GO:0001206	transcriptional repressor activity, RNA ...	gene10188:106603639, gene12283:106605616, gene28770:106567727, gene3772:106577891	0.01507
75	MF	GO:0000900	translation repressor activity, nucleic ...	gene10424:106603870, gene16230:106609337, gene31768:106570635, gene42649:106581490, gene45475:106584219	0.01516
76	MF	GO:0005527	macrolide binding	gene26209:106565346, gene31753:106570612, gene40889:106579776, gene44582:100196052, gene48856:106587624	0.01516
77	MF	GO:0005528	FK506 binding	gene26209:106565346, gene31753:106570612, gene40889:106579776, gene44582:100196052, gene48856:106587624	0.01516
78	MF	GO:0036004	GAF domain binding	gene53461:106597306, gene9916:106603240	0.01526
79	MF	GO:0047493	ceramide cholinephosphotransferase activ...	gene38124:106577006, gene39327:106578226	0.01526
80	MF	GO:0030977	taurine binding	gene27233:106566182, gene44917:100194771	0.01526
81	MF	GO:0047676	arachidonate-CoA ligase activity	gene6335:106599520, gene9919:106603377	0.01526
82	MF	GO:0033188	sphingomyelin synthase activity	gene38124:106577006, gene39327:106578226	0.01526
83	MF	GO:0051879	Hsp90 protein binding	gene18991:106611988, gene2866:106569712, gene29145:106567770, gene40889:106579776, gene43593:100136911, gene51273:106589722, gene51815:106590294, gene80:106599806, gene8303:106601937	0.01659
84	MF	GO:0008395	steroid hydroxylase activity	gene1080:106604807, gene37891:106576803, gene44393:106583179, gene45307:106584062, gene51736:106590187	0.0166
85	MF	GO:0031994	insulin-like growth factor I binding	gene21210:101448057, gene4678:100194498, gene49296:106588073, gene66372:106592162	0.01694
86	MF	GO:0042975	peroxisome proliferator activated recept...	gene1027:106604361, gene15578:106608616, gene18957:106611923, gene320:106570052, gene38727:106577610, gene7530:106601159	0.01711
87	MF	GO:0046975	histone methyltransferase activity (H3-K...	gene10856:106604211, gene26757:106565748, gene41508:106580395	0.01776
88	MF	GO:0000340	RNA 7-methylguanosine cap binding	gene30887:106569767, gene49703:100380831, gene6892:106600575	0.01776
89	MF	GO:0031957	very long-chain fatty acid-CoA ligase ac...	gene29506:106568426, gene6335:106599520, gene9919:106603377	0.01776
90	MF	GO:0005010	insulin-like growth factor-activated rec...	gene14611:106607799, gene49296:106588073, gene66372:106592162	0.01776
91	MF	GO:0019902	phosphatase binding	gene11802:106605147, gene13954:106607159, gene14776:106607967, gene15601:106608778, gene19414:106612392, gene20824:106613792, gene21338:106560529, gene21752:100136415, gene22116:106561324, gene23833:106562976, gene2536:106566762, gene25803:106564804, gene28159:106567054, gene28479:106567379, gene29156:106567763, gene29294:106568245, gene29346:106568136, gene312:106569575, gene31906:106570769, gen…	0.01836
92	MF	GO:0001046	core promoter sequence-specific DNA bind...	gene10457:106603906, gene10856:106604211, gene11900:100136378, gene13852:106607080, gene13936:106607176, gene14213:106607496, gene15130:106608294, gene22999:106562092, gene23340:106562490, gene25381:106564532, gene26276:106565395, gene29145:106567770, gene39631:106578540, gene4157:106582110, gene41882:106580735, gene42734:106581582, gene44423:106583303, gene48548:106587185, gene48573:106587332, g…	0.01894
93	MF	GO:0043559	insulin binding	gene21338:106560529, gene44744:106583415, gene49296:106588073, gene66372:106592162	0.01895
94	MF	GO:0016773	phosphotransferase activity, alcohol gro...	gene10488:106603934, gene10549:106603990, gene11600:106604954, gene12913:106606261, gene14239:106607477, gene14257:106607467, gene14511:106607729, gene14611:106607799, gene19475:106612460, gene19878:106612828, gene20824:106613792, gene21109:106560292, gene21338:106560529, gene21822:106560921, gene22116:106561324, gene22237:106561392, gene22518:106561677, gene22578:106561740, gene23835:106562980, …	0.02044
95	MF	GO:0005131	growth hormone receptor binding	gene26108:106565139, gene26826:106565979, gene28441:106567289	0.0208
96	MF	GO:0090624	endoribonuclease activity, cleaving miRN...	gene30887:106569767, gene49703:100380831	0.0209
97	MF	GO:0042937	tripeptide transporter activity	gene35582:106574544, gene36405:106575314	0.0209
98	MF	GO:0070551	endoribonuclease activity, cleaving siRN...	gene30887:106569767, gene49703:100380831	0.0209
99	MF	GO:0071997	glutathione S-conjugate-transporting ATP...	gene35582:106574544, gene36405:106575314	0.0209
100	MF	GO:0015431	glutathione S-conjugate-exporting ATPase...	gene35582:106574544, gene36405:106575314	0.0209
101	MF	GO:0034634	glutathione transmembrane transporter ac...	gene35582:106574544, gene36405:106575314	0.0209
102	MF	GO:0015605	organophosphate ester transmembrane tran...	gene10487:106603933, gene19122:106612116, gene20142:106613130, gene24195:106563187, gene32438:100194525, gene41227:106579972, gene50748:106589263	0.0209
103	MF	GO:0008188	neuropeptide receptor activity	gene13172:106606520, gene16874:106609958, gene4338:106583575, gene47850:106586618	0.0211
104	MF	GO:0005516	calmodulin binding	gene10488:106603934, gene11802:106605147, gene17688:106610738, gene19414:106612392, gene19878:106612828, gene21124:106560302, gene21338:106560529, gene22518:106561677, gene2289:106563782, gene2341:106564343, gene29346:106568136, gene31818:106570678, gene3388:106574328, gene40183:106579321, gene43924:106582757, gene44237:106583131, gene45630:106584368, gene49260:106588037, gene6061:106598526, gene…	0.02201
105	MF	GO:0005001	transmembrane receptor protein tyrosine ...	gene30144:106568821, gene35232:106574153, gene45864:106584595, gene51900:106590348, gene72685:106596240	0.02326
106	MF	GO:0015245	fatty acid transporter activity	gene29506:106568426, gene35582:106574544, gene36405:106575314, gene56171:106590783	0.02339
107	MF	GO:0016709	oxidoreductase activity, acting on paire...	gene1080:106604807, gene25405:106564551, gene34352:106573205, gene37891:106576803, gene44393:106583179, gene51802:106590306	0.02419
108	MF	GO:0031702	type 1 angiotensin receptor binding	gene20229:106613218, gene35242:106574143, gene39308:106578207, gene56763:106595050	0.02583
109	MF	GO:0008092	cytoskeletal protein binding	gene1027:106604361, gene1131:106605231, gene11600:106604954, gene12957:106606308, gene15578:106608616, gene17163:106610255, gene18339:106611380, gene1851:106611671, gene18791:106611717, gene18872:106611857, gene18957:106611923, gene20451:106613438, gene20799:106613773, gene21124:106560302, gene2289:106563782, gene2341:106564343, gene23795:106562945, gene23906:106563047, gene25405:106564551, gene2…	0.02593
110	MF	GO:0004930	G-protein coupled receptor activity	gene10970:106604332, gene12207:106605553, gene13172:106606520, gene13469:106606823, gene14486:106607709, gene16874:106609958, gene18767:106611738, gene21752:100136415, gene26498:106565668, gene27412:106566362, gene2772:106568685, gene29763:100195489, gene30132:106568833, gene30436:106569329, gene32210:106571060, gene35233:106574152, gene38359:106577235, gene39308:106578207, gene42640:106581491, g…	0.02647
111	MF	GO:0019811	cocaine binding	gene8456:106602089, gene8475:106602109	0.02726
112	MF	GO:0005335	serotonin:sodium symporter activity	gene8456:106602089, gene8475:106602109	0.02726
113	MF	GO:0004740	pyruvate dehydrogenase (acetyl-transferr...	gene14239:106607477, gene7265:106600850	0.02726
114	MF	GO:0008559	xenobiotic-transporting ATPase activity	gene35582:106574544, gene36405:106575314	0.02726
115	MF	GO:0045502	dynein binding	gene20799:106613773, gene27768:106566609, gene29552:106568492, gene42253:106581181, gene8456:106602089, gene8475:106602109	0.0311
116	MF	GO:0005057	receptor signaling protein activity	gene10549:106603990, gene1426:106609185, gene14333:106607549, gene1970:106560625, gene22875:106562068, gene28159:106567054, gene3025:106571505, gene31753:106570612, gene37348:106576243, gene38257:106577155, gene40719:100136506, gene43813:106582660, gene46592:106585604, gene48968:106587736, gene48998:106587767, gene49103:106587875, gene49296:106588073, gene52216:106590679, gene66372:106592162, gen…	0.03111
117	MF	GO:0016493	C-C chemokine receptor activity	gene29763:100195489, gene42905:106581841, gene47375:100306754, gene51739:106590189, gene5779:106597311, gene6708:106600212	0.03123
118	MF	GO:0031686	A1 adenosine receptor binding	gene18767:106611738, gene19986:106613013, gene34008:106572869	0.03149
119	MF	GO:0005324	long-chain fatty acid transporter activi...	gene35582:106574544, gene36405:106575314, gene56171:106590783	0.03149
120	MF	GO:0043423	3-phosphoinositide-dependent protein kin...	gene31486:106570356, gene49296:106588073, gene66372:106592162	0.03149
121	MF	GO:0030553	cGMP binding	gene11179:106604533, gene53461:106597306, gene9916:106603240	0.03149
122	MF	GO:0097493	structural molecule activity conferring ...	gene49260:106588037, gene61406:106595963, gene78169:106595265	0.03149
123	MF	GO:0031490	chromatin DNA binding	gene1027:106604361, gene10527:100136800, gene12063:106605451, gene14776:106607967, gene15578:106608616, gene18957:106611923, gene21413:106560604, gene29145:106567770, gene30097:100301980, gene38727:106577610, gene39357:106578255, gene4000:106580205, gene40176:106579329, gene40305:106579217, gene49103:106587875, gene7530:106601159	0.03226
124	MF	GO:0030545	receptor regulator activity	gene1027:106604361, gene1267:106608700, gene15578:106608616, gene21522:100136550, gene38359:106577235, gene38727:106577610, gene80503:106591314	0.03255
125	MF	GO:0032559	adenyl ribonucleotide binding	gene10487:106603933, gene10488:106603934, gene10549:106603990, gene11179:106604533, gene12863:106606205, gene14239:106607477, gene16790:106609880, gene18767:106611738, gene19475:106612460, gene19878:106612828, gene19986:106613013, gene20407:106613394, gene21109:106560292, gene21822:106560921, gene22116:106561324, gene22237:106561392, gene22400:100136366, gene22518:106561677, gene2289:106563782, g…	0.03295
126	MF	GO:0015175	neutral amino acid transmembrane transpo...	gene15708:106608835, gene18662:106611663, gene27233:106566182, gene31698:106570559, gene3906:106579373, gene44917:100194771	0.033
127	MF	GO:0008519	ammonium transmembrane transporter activ...	gene18047:106611136, gene27580:106566494, gene2979:100136908, gene30307:106569207, gene8456:106602089, gene8475:106602109	0.033
128	MF	GO:0031701	angiotensin receptor binding	gene20229:106613218, gene35242:106574143, gene39308:106578207, gene56763:106595050	0.03404
129	MF	GO:0005249	voltage-gated potassium channel activity	gene1834:106611875, gene1851:106611671, gene2377:106564765, gene28816:106567683, gene42916:106581833, gene44299:106583079, gene51441:106589891	0.03426
130	MF	GO:0015385	sodium:proton antiporter activity	gene11802:106605147, gene47988:106586777	0.03428
131	MF	GO:0016404	15-hydroxyprostaglandin dehydrogenase (N...	gene35582:106574544, gene36405:106575314	0.03428
132	MF	GO:0004939	beta-adrenergic receptor activity	gene10970:106604332, gene46592:106585604	0.03428
133	MF	GO:0031871	proteinase activated receptor binding	gene27768:106566609, gene50335:106588745	0.03428
134	MF	GO:0034040	lipid-transporting ATPase activity	gene35582:106574544, gene36405:106575314	0.03428
135	MF	GO:0050508	glucuronosyl-N-acetylglucosaminyl-proteo...	gene31066:106570050, gene70325:106593181	0.03428
136	MF	GO:0050509	N-acetylglucosaminyl-proteoglycan 4-beta...	gene31066:106570050, gene70325:106593181	0.03428
137	MF	GO:0035613	RNA stem-loop binding	gene10424:106603870, gene36639:106575550, gene45475:106584219	0.03558
138	MF	GO:0030554	adenyl nucleotide binding	gene10487:106603933, gene10488:106603934, gene10549:106603990, gene11179:106604533, gene12863:106606205, gene14239:106607477, gene16790:106609880, gene18767:106611738, gene19475:106612460, gene19878:106612828, gene19986:106613013, gene20407:106613394, gene21109:106560292, gene21822:106560921, gene22116:106561324, gene22237:106561392, gene22400:100136366, gene22518:106561677, gene2289:106563782, g…	0.03589
139	MF	GO:0001076	transcription factor activity, RNA polym...	gene10079:106603496, gene1027:106604361, gene10527:100136800, gene15578:106608616, gene18944:106611936, gene21752:100136415, gene22237:106561392, gene26276:106565395, gene28638:106567530, gene29145:106567770, gene38727:106577610, gene39631:106578540, gene40176:106579329, gene41365:106579856, gene42734:106581582, gene45005:106583767, gene5057:106590657, gene51088:106589552, gene51273:106589722, ge…	0.03599
140	MF	GO:0043014	alpha-tubulin binding	gene1027:106604361, gene15578:106608616, gene18957:106611923, gene27670:106566571, gene38727:106577610, gene7638:106601266, gene78882:106592534	0.03602
141	MF	GO:0005102	receptor binding	gene1027:106604361, gene10487:106603933, gene10664:106604092, gene10856:106604211, gene10970:106604332, gene11179:106604533, gene1267:106608700, gene13951:106607161, gene14239:106607477, gene14257:106607467, gene14511:106607729, gene15093:106608273, gene15578:106608616, gene15601:106608778, gene15977:106609064, gene16790:106609880, gene18767:106611738, gene18791:106611717, gene18872:106611857, ge…	0.03607
142	MF	GO:0015399	primary active transmembrane transporter...	gene10487:106603933, gene16790:106609880, gene22400:100136366, gene24198:106563184, gene29997:106568941, gene3388:106574328, gene35004:106573868, gene35261:100846967, gene35582:106574544, gene36405:106575314, gene49010:106587779, gene56171:106590783, gene6201:106599036	0.0361
143	MF	GO:0015405	P-P-bond-hydrolysis-driven transmembrane...	gene10487:106603933, gene16790:106609880, gene22400:100136366, gene24198:106563184, gene29997:106568941, gene3388:106574328, gene35004:106573868, gene35261:100846967, gene35582:106574544, gene36405:106575314, gene49010:106587779, gene56171:106590783, gene6201:106599036	0.0361
144	MF	GO:1901682	sulfur compound transmembrane transporte...	gene26117:106565132, gene27233:106566182, gene35582:106574544, gene36405:106575314, gene44917:100194771	0.03611
145	MF	GO:0004672	protein kinase activity	gene10488:106603934, gene10549:106603990, gene11600:106604954, gene14239:106607477, gene14257:106607467, gene14511:106607729, gene14611:106607799, gene19475:106612460, gene19878:106612828, gene20824:106613792, gene21109:106560292, gene21822:106560921, gene22116:106561324, gene22237:106561392, gene22518:106561677, gene23835:106562980, gene24093:106563265, gene2715:106567959, gene28040:106566942, g…	0.03622
146	MF	GO:0030165	PDZ domain binding	gene10970:106604332, gene11179:106604533, gene12957:106606308, gene13172:106606520, gene14257:106607467, gene15093:106608273, gene16590:106609675, gene22400:100136366, gene30132:106568833, gene36296:106575175, gene40618:106579507, gene40719:100136506, gene42294:106581151, gene46592:106585604, gene47085:106585836, gene497:106589077, gene7174:106600913, gene7866:106601470, gene80503:106591314	0.03666
147	MF	GO:0036312	phosphatidylinositol 3-kinase regulatory...	gene21338:106560529, gene23833:106562976, gene29582:106568503, gene41882:106580735	0.03707
148	MF	GO:0004707	MAP kinase activity	gene37348:106576243, gene48968:106587736, gene48998:106587767, gene66786:106592057	0.03707
149	MF	GO:0046873	metal ion transmembrane transporter acti...	gene10487:106603933, gene10660:106604089, gene11802:106605147, gene14333:106607549, gene1834:106611875, gene1851:106611671, gene19948:106612936, gene2377:106564765, gene25706:106564879, gene27233:106566182, gene27580:106566494, gene28816:106567683, gene2979:100136908, gene30307:106569207, gene31753:106570612, gene3388:106574328, gene35004:106573868, gene35261:100846967, gene3906:106579373, gene41…	0.03754
150	MF	GO:1901677	phosphate transmembrane transporter acti...	gene10487:106603933, gene19122:106612116, gene20142:106613130, gene24195:106563187, gene32438:100194525, gene41227:106579972, gene50748:106589263	0.03785
151	BP	GO:0060086	circadian temperature homeostasis	gene11900:100136378, gene14213:106607496, gene20799:106613773, gene29552:106568492, gene4157:106582110, gene44423:106583303, gene7293:106600825	7.8e-07
152	BP	GO:0000122	negative regulation of transcription fro...	gene10079:106603496, gene10188:106603639, gene10424:106603870, gene10457:106603906, gene10527:100136800, gene10664:106604092, gene10745:106604170, gene10856:106604211, gene11900:100136378, gene12063:106605451, gene12283:106605616, gene12439:106605788, gene1267:106608700, gene13852:106607080, gene13936:106607176, gene13951:106607161, gene14213:106607496, gene14257:106607467, gene14776:106607967, g…	1.5e-06
153	BP	GO:0045668	negative regulation of osteoblast differ...	gene11332:106604687, gene13936:106607176, gene13951:106607161, gene22012:106561177, gene22999:106562092, gene26712:106565791, gene2715:106567959, gene30708:106569597, gene32389:100196381, gene36507:106575424, gene38359:106577235, gene40238:106579272, gene42711:106581560, gene46302:106585152, gene47232:106585985, gene48548:106587185, gene48806:106587570, gene48856:106587624, gene49103:106587875, g…	2.4e-06
154	BP	GO:0032922	circadian regulation of gene expression	gene1027:106604361, gene11332:106604687, gene11900:100136378, gene14213:106607496, gene15578:106608616, gene18957:106611923, gene21752:100136415, gene23340:106562490, gene26712:106565791, gene28692:106567574, gene29145:106567770, gene30097:100301980, gene32389:100196381, gene38727:106577610, gene39631:106578540, gene4157:106582110, gene43593:100136911, gene44423:106583303, gene6759:106600026, gen…	2e-05
155	BP	GO:0071456	cellular response to hypoxia	gene1027:106604361, gene10424:106603870, gene10457:106603906, gene10970:106604332, gene11802:106605147, gene13721:106606950, gene13950:106607162, gene14239:106607477, gene15578:106608616, gene18957:106611923, gene21752:100136415, gene22237:106561392, gene30228:106569079, gene30432:106569334, gene31906:106570769, gene35242:106574143, gene38359:106577235, gene38644:106577545, gene38727:106577610, g…	2.9e-05
156	BP	GO:0045600	positive regulation of fat cell differen...	gene10188:106603639, gene11332:106604687, gene12283:106605616, gene21752:100136415, gene26712:106565791, gene28336:100194884, gene28770:106567727, gene30398:100196464, gene32389:100196381, gene33633:106572480, gene36507:106575424, gene3772:106577891, gene38359:106577235, gene39631:106578540, gene42711:106581560, gene50592:106589020, gene52216:106590679, gene54636:106591582, gene6559:100195174	3.1e-05
157	BP	GO:0048015	phosphatidylinositol-mediated signaling	gene14239:106607477, gene14776:106607967, gene15601:106608778, gene15977:106609064, gene17148:100380732, gene17920:106611031, gene21338:106560529, gene21752:100136415, gene22012:106561177, gene22457:106561638, gene23833:106562976, gene24024:106563326, gene25518:106564678, gene2715:106567959, gene28159:106567054, gene29157:106567758, gene29582:106568503, gene30887:106569767, gene31906:106570769, g…	3.2e-05
158	BP	GO:0071260	cellular response to mechanical stimulus	gene10457:106603906, gene11802:106605147, gene13936:106607176, gene16405:106609517, gene21150:106560326, gene21522:100136550, gene2772:106568685, gene3025:106571505, gene32664:106571469, gene36226:106575138, gene37490:100306766, gene39308:106578207, gene41365:106579856, gene45383:106584172, gene48998:106587767, gene49296:106588073, gene51273:106589722, gene53461:106597306, gene6159:106598934, gen…	3.4e-05
159	BP	GO:0035634	response to stilbenoid	gene1027:106604361, gene15578:106608616, gene18957:106611923, gene38727:106577610	4.4e-05
160	BP	GO:0007329	positive regulation of transcription fro...	gene1027:106604361, gene15578:106608616, gene18957:106611923, gene38727:106577610	4.4e-05
161	BP	GO:2000184	positive regulation of progesterone bios...	gene1027:106604361, gene15578:106608616, gene18957:106611923, gene38727:106577610	4.4e-05
162	BP	GO:0036273	response to statin	gene1027:106604361, gene15578:106608616, gene18957:106611923, gene38727:106577610	4.4e-05
163	BP	GO:0043619	regulation of transcription from RNA pol...	gene12423:106605774, gene13721:106606950, gene13950:106607162, gene25894:106565042, gene4980:106590030, gene5016:106590330, gene51060:106589531, gene51273:106589722, gene7609:106601241	4.4e-05
164	BP	GO:0070859	positive regulation of bile acid biosynt...	gene11900:100136378, gene14213:106607496, gene4157:106582110, gene44423:106583303, gene7293:106600825	4.8e-05
165	BP	GO:0071250	cellular response to nitrite	gene1027:106604361, gene15578:106608616, gene18957:106611923, gene38727:106577610, gene51273:106589722	4.8e-05
166	BP	GO:0048469	cell maturation	gene10079:106603496, gene12423:106605774, gene12863:106606205, gene13721:106606950, gene13950:106607162, gene14776:106607967, gene15126:106608296, gene1851:106611671, gene20799:106613773, gene21564:106560790, gene22400:100136366, gene23183:106562338, gene23243:106562395, gene2377:106564765, gene26325:106565435, gene26712:106565791, gene2715:106567959, gene27768:106566609, gene28336:100194884, gen…	6.7e-05
167	BP	GO:0034144	negative regulation of toll-like recepto...	gene11900:100136378, gene14213:106607496, gene23833:106562976, gene4157:106582110, gene44423:106583303, gene7293:106600825	0.00013
168	BP	GO:1901860	positive regulation of mitochondrial DNA...	gene1027:106604361, gene15578:106608616, gene18957:106611923, gene38727:106577610	0.00015
169	BP	GO:1901558	response to metformin	gene1027:106604361, gene15578:106608616, gene18957:106611923, gene38727:106577610	0.00015
170	BP	GO:2000637	positive regulation of gene silencing by...	gene31739:106570615, gene31768:106570635, gene39262:106578158, gene42649:106581490, gene45700:106584426, gene48806:106587570	0.00016
171	BP	GO:0048662	negative regulation of smooth muscle cel...	gene1027:106604361, gene15578:106608616, gene18957:106611923, gene21338:106560529, gene21752:100136415, gene38727:106577610, gene41882:106580735, gene4980:106590030, gene5016:106590330, gene50696:106589124, gene6032:106598598	0.00021
172	BP	GO:0043153	entrainment of circadian clock by photop...	gene14878:106608063, gene19475:106612460, gene20799:106613773, gene21822:106560921, gene26385:106565592, gene26712:106565791, gene28692:106567574, gene29552:106568492, gene30097:100301980, gene32389:100196381, gene50303:106588784	0.00023
173	BP	GO:0051552	flavone metabolic process	gene1027:106604361, gene15578:106608616, gene18957:106611923, gene38727:106577610	0.00024
174	BP	GO:0045670	regulation of osteoclast differentiation	gene1027:106604361, gene12439:106605788, gene13951:106607161, gene15130:106608294, gene15578:106608616, gene17688:106610738, gene20799:106613773, gene21338:106560529, gene27600:106566511, gene28336:100194884, gene29157:106567758, gene29552:106568492, gene33633:106572480, gene38359:106577235, gene38727:106577610, gene39631:106578540, gene41882:106580735, gene57355:106592182	0.00024
175	BP	GO:0048625	myoblast fate commitment	gene10527:100136800, gene12423:106605774, gene13721:106606950, gene13950:106607162, gene51060:106589531, gene51273:106589722, gene7609:106601241	0.00027
176	BP	GO:0019722	calcium-mediated signaling	gene10487:106603933, gene10488:106603934, gene1056:106604578, gene11802:106605147, gene12207:106605553, gene13936:106607176, gene13954:106607159, gene14239:106607477, gene16418:106609526, gene16590:106609675, gene18791:106611717, gene22518:106561677, gene2289:106563782, gene22999:106562092, gene23906:106563047, gene26385:106565592, gene28159:106567054, gene29346:106568136, gene2979:100136908, gen…	0.00029
177	BP	GO:0045892	negative regulation of transcription, DN...	gene10079:106603496, gene10188:106603639, gene1027:106604361, gene10424:106603870, gene10457:106603906, gene10527:100136800, gene10664:106604092, gene10745:106604170, gene1080:106604807, gene10856:106604211, gene11900:100136378, gene12063:106605451, gene12283:106605616, gene12439:106605788, gene1267:106608700, gene13852:106607080, gene13936:106607176, gene13951:106607161, gene14213:106607496, gen…	0.00032
178	BP	GO:0007623	circadian rhythm	gene1027:106604361, gene10457:106603906, gene11332:106604687, gene11900:100136378, gene13721:106606950, gene13852:106607080, gene13950:106607162, gene14213:106607496, gene14878:106608063, gene14984:106608192, gene15578:106608616, gene1851:106611671, gene18957:106611923, gene19475:106612460, gene20799:106613773, gene21752:100136415, gene21822:106560921, gene23340:106562490, gene23906:106563047, ge…	0.00035
179	BP	GO:0042026	protein refolding	gene1970:106560625, gene19986:106613013, gene2866:106569712, gene31753:106570612, gene32862:100380418, gene34008:106572869, gene5189:106591679, gene7092:106600736, gene7385:106601018	0.00036
180	BP	GO:0008285	negative regulation of cell proliferatio...	gene10188:106603639, gene1027:106604361, gene1080:106604807, gene11179:106604533, gene12207:106605553, gene12863:106606205, gene13172:106606520, gene13405:106606801, gene13936:106607176, gene13951:106607161, gene14257:106607467, gene14511:106607729, gene14611:106607799, gene15093:106608273, gene15578:106608616, gene15778:106608879, gene18957:106611923, gene19414:106612392, gene20594:106613585, ge…	0.00036
181	BP	GO:0071243	cellular response to arsenic-containing ...	gene10424:106603870, gene36639:106575550, gene45475:106584219, gene45630:106584368, gene48968:106587736, gene4980:106590030, gene5016:106590330, gene66786:106592057	0.00036
182	BP	GO:0003333	amino acid transmembrane transport	gene15708:106608835, gene16405:106609517, gene16406:106609518, gene18662:106611663, gene19948:106612936, gene27233:106566182, gene27580:106566494, gene31698:106570559, gene37490:100306766, gene3906:106579373, gene43895:106582726, gene44917:100194771, gene52133:106590589	0.00036
183	BP	GO:0071871	response to epinephrine	gene1027:106604361, gene11802:106605147, gene15578:106608616, gene18957:106611923, gene36226:106575138, gene38727:106577610, gene43038:106581900, gene45278:106584037, gene47988:106586777	0.0004
184	BP	GO:0043065	positive regulation of apoptotic process	gene10188:106603639, gene1027:106604361, gene10457:106603906, gene10745:106604170, gene1080:106604807, gene10970:106604332, gene11179:106604533, gene11802:106605147, gene12207:106605553, gene13602:106606840, gene13936:106607176, gene13951:106607161, gene14486:106607709, gene14611:106607799, gene14776:106607967, gene15578:106608616, gene16678:106609765, gene1851:106611671, gene18957:106611923, gen…	0.00042
185	BP	GO:0035947	regulation of gluconeogenesis by regulat...	gene11900:100136378, gene14213:106607496, gene14776:106607967, gene34384:106573190, gene4157:106582110, gene44423:106583303, gene7293:106600825	0.00044
186	BP	GO:0015695	organic cation transport	gene15708:106608835, gene18047:106611136, gene217:106560243, gene31698:106570559, gene35081:106573936, gene35582:106574544, gene36405:106575314	0.00044
187	BP	GO:0046626	regulation of insulin receptor signaling...	gene15601:106608778, gene19475:106612460, gene21522:100136550, gene26325:106565435, gene29744:106568655, gene31906:106570769, gene32079:106570941, gene35232:106574153, gene36161:106575127, gene36226:106575138, gene43220:106582130, gene47911:106586664, gene50301:106588785, gene72685:106596240, gene8278:106601915	0.00044
188	BP	GO:0060487	lung epithelial cell differentiation	gene25948:106565282, gene28427:106567280, gene36507:106575424, gene37389:106576285, gene39631:106578540, gene40176:106579329, gene41894:100136356, gene42711:106581560, gene42734:106581582, gene47:106579027, gene52198:106590661, gene54636:106591582, gene80:106599806	0.00046
189	BP	GO:0061469	regulation of type B pancreatic cell pro...	gene11900:100136378, gene14213:106607496, gene38359:106577235, gene4157:106582110, gene44423:106583303, gene7293:106600825	0.00046
190	BP	GO:0090023	positive regulation of neutrophil chemot...	gene12207:106605553, gene22518:106561677, gene2424:106565855, gene29763:100195489, gene39308:106578207, gene3980:106580063, gene41365:106579856, gene43924:106582757, gene51739:106590189, gene5779:106597311	0.00048
191	BP	GO:0042663	regulation of endodermal cell fate speci...	gene1267:106608700, gene19148:106612139, gene2715:106567959, gene27286:106566241, gene28553:106567483, gene34283:106573116, gene7028:106600678	0.00051
192	BP	GO:0006012	galactose metabolic process	gene1027:106604361, gene15578:106608616, gene18957:106611923, gene27670:106566571, gene32438:100194525, gene38727:106577610, gene48141:106586902	0.00068
193	BP	GO:0002408	myeloid dendritic cell chemotaxis	gene2424:106565855, gene29763:100195489, gene51739:106590189, gene5779:106597311	0.00076
194	BP	GO:1903944	negative regulation of hepatocyte apopto...	gene23183:106562338, gene23243:106562395, gene49296:106588073, gene66372:106592162	0.00076
195	BP	GO:0016330	second mitotic wave involved in compound...	gene15093:106608273, gene20799:106613773, gene29552:106568492, gene497:106589077	0.00076
196	BP	GO:0042752	regulation of circadian rhythm	gene1027:106604361, gene11332:106604687, gene11900:100136378, gene14213:106607496, gene14878:106608063, gene15578:106608616, gene18957:106611923, gene19475:106612460, gene20799:106613773, gene21752:100136415, gene21822:106560921, gene26385:106565592, gene26712:106565791, gene2772:106568685, gene28692:106567574, gene29145:106567770, gene29552:106568492, gene30097:100301980, gene32389:100196381, ge…	0.00078
197	BP	GO:0033673	negative regulation of kinase activity	gene12863:106606205, gene14239:106607477, gene15601:106608778, gene20799:106613773, gene21124:106560302, gene21150:106560326, gene22116:106561324, gene22237:106561392, gene23183:106562338, gene23833:106562976, gene26108:106565139, gene26325:106565435, gene27286:106566241, gene28336:100194884, gene28441:106567289, gene29157:106567758, gene29552:106568492, gene30398:100196464, gene31906:106570769, …	0.00078
198	BP	GO:0000185	activation of MAPKKK activity	gene21150:106560326, gene23833:106562976, gene38257:106577155, gene45383:106584172, gene6159:106598934, gene67455:106594839	0.00079
199	BP	GO:0045944	positive regulation of transcription fro...	gene10079:106603496, gene1027:106604361, gene10457:106603906, gene10527:100136800, gene11802:106605147, gene12207:106605553, gene12423:106605774, gene12439:106605788, gene13721:106606950, gene13936:106607176, gene13950:106607162, gene14257:106607467, gene14776:106607967, gene14984:106608192, gene15093:106608273, gene15130:106608294, gene15578:106608616, gene17688:106610738, gene18957:106611923, g…	0.00083
200	BP	GO:0030099	myeloid cell differentiation	gene10188:106603639, gene1027:106604361, gene12283:106605616, gene12423:106605774, gene12439:106605788, gene13721:106606950, gene13852:106607080, gene13950:106607162, gene13951:106607161, gene14611:106607799, gene14776:106607967, gene15093:106608273, gene15126:106608296, gene15130:106608294, gene15578:106608616, gene17148:100380732, gene17688:106610738, gene20799:106613773, gene21338:106560529, g…	0.00092
201	BP	GO:0071371	cellular response to gonadotropin stimul...	gene1027:106604361, gene10457:106603906, gene1080:106604807, gene15578:106608616, gene18957:106611923, gene37891:106576803, gene38727:106577610, gene46608:106585589	0.00097
202	BP	GO:0072091	regulation of stem cell proliferation	gene13936:106607176, gene15601:106608778, gene16077:106609245, gene20799:106613773, gene22999:106562092, gene26276:106565395, gene2715:106567959, gene28427:106567280, gene29157:106567758, gene29552:106568492, gene30887:106569767, gene31716:106570575, gene36161:106575127, gene41365:106579856, gene42734:106581582, gene43220:106582130, gene43823:106582669, gene4594:106585476, gene46454:106585026, ge…	0.00099
203	BP	GO:0045725	positive regulation of glycogen biosynth...	gene15601:106608778, gene15977:106609064, gene21522:100136550, gene43220:106582130, gene47911:106586664, gene49296:106588073, gene66372:106592162	0.00103
204	BP	GO:0032869	cellular response to insulin stimulus	gene10424:106603870, gene10457:106603906, gene11179:106604533, gene11802:106605147, gene12957:106606308, gene13936:106607176, gene14239:106607477, gene14333:106607549, gene14776:106607967, gene15601:106608778, gene15977:106609064, gene17148:100380732, gene19475:106612460, gene20142:106613130, gene20824:106613792, gene21015:106613957, gene21210:101448057, gene21338:106560529, gene21522:100136550, …	0.00109
205	BP	GO:1901861	regulation of muscle tissue development	gene1027:106604361, gene10745:106604170, gene10970:106604332, gene11900:100136378, gene1267:106608700, gene13936:106607176, gene14213:106607496, gene15578:106608616, gene18957:106611923, gene19280:106612265, gene26276:106565395, gene26325:106565435, gene2715:106567959, gene28159:106567054, gene28427:106567280, gene28692:106567574, gene31696:106570557, gene36226:106575138, gene38727:106577610, gen…	0.0011
206	BP	GO:0070886	positive regulation of calcineurin-NFAT ...	gene11802:106605147, gene28159:106567054, gene2979:100136908, gene47988:106586777, gene80:106599806	0.00115
207	BP	GO:0071321	cellular response to cGMP	gene11179:106604533, gene53461:106597306, gene8456:106602089, gene8475:106602109, gene9916:106603240	0.00115
208	BP	GO:0001892	embryonic placenta development	gene10856:106604211, gene12423:106605774, gene13721:106606950, gene13950:106607162, gene17148:100380732, gene17688:106610738, gene2715:106567959, gene28159:106567054, gene28336:100194884, gene30132:106568833, gene30398:100196464, gene31696:106570557, gene33633:106572480, gene36715:106575629, gene36722:106575637, gene37389:106576285, gene41365:106579856, gene41882:106580735, gene4685:106587804, ge…	0.00118
209	BP	GO:0097191	extrinsic apoptotic signaling pathway	gene14239:106607477, gene14776:106607967, gene19906:106612804, gene21338:106560529, gene21770:106560977, gene22237:106561392, gene23833:106562976, gene23957:106563139, gene2536:106566762, gene25803:106564804, gene25948:106565282, gene2715:106567959, gene28159:106567054, gene28999:106567892, gene29157:106567758, gene30708:106569597, gene32875:106571579, gene32894:106571561, gene36226:106575138, ge…	0.0012
210	BP	GO:0035024	negative regulation of Rho protein signa...	gene21413:106560604, gene32079:106570941, gene40249:106579263, gene42129:106580986, gene45561:106584319, gene56763:106595050, gene7248:106600863, gene8537:106602231	0.0012
211	BP	GO:0051930	regulation of sensory perception of pain	gene10970:106604332, gene11802:106605147, gene2715:106567959, gene28816:106567683, gene39308:106578207, gene43885:106582617, gene44122:106583036, gene47988:106586777, gene7809:100195471	0.00125
212	BP	GO:1900477	negative regulation of G1/S transition o...	gene5057:106590657, gene5400:106593639, gene78739:106594921	0.00126
213	BP	GO:0006814	sodium ion transport	gene10970:106604332, gene11802:106605147, gene16405:106609517, gene16406:106609518, gene18791:106611717, gene19475:106612460, gene19948:106612936, gene21822:106560921, gene22116:106561324, gene27233:106566182, gene27580:106566494, gene28380:106567236, gene28816:106567683, gene2979:100136908, gene30097:100301980, gene31486:106570356, gene3388:106574328, gene34009:106572868, gene35261:100846967, ge…	0.00133
214	BP	GO:0071603	endothelial cell-cell adhesion	gene1080:106604807, gene37891:106576803, gene3980:106580063, gene45253:106584018	0.00138
215	BP	GO:2000189	positive regulation of cholesterol homeo...	gene11900:100136378, gene14213:106607496, gene4157:106582110, gene44423:106583303, gene7293:106600825	0.0014
216	BP	GO:2000273	positive regulation of receptor activity	gene1027:106604361, gene15578:106608616, gene21522:100136550, gene22400:100136366, gene25498:106564692, gene30082:106568874, gene38359:106577235, gene38727:106577610, gene43885:106582617, gene7946:106601574, gene80503:106591314, gene8456:106602089, gene8475:106602109	0.00147
217	BP	GO:0071276	cellular response to cadmium ion	gene19986:106613013, gene34008:106572869, gene48968:106587736, gene4980:106590030, gene5016:106590330, gene51736:106590187, gene66786:106592057	0.00149
218	BP	GO:0060346	bone trabecula formation	gene1027:106604361, gene15578:106608616, gene38359:106577235, gene38727:106577610, gene3980:106580063, gene61406:106595963, gene78169:106595265	0.00149
219	BP	GO:1901985	positive regulation of protein acetylati...	gene1027:106604361, gene22518:106561677, gene26276:106565395, gene30398:100196464, gene34384:106573190, gene38727:106577610, gene43924:106582757, gene48998:106587767, gene6559:100195174, gene66786:106592057, gene7530:106601159, gene908:106603776	0.00151
220	BP	GO:0035914	skeletal muscle cell differentiation	gene10457:106603906, gene11900:100136378, gene12423:106605774, gene13721:106606950, gene13950:106607162, gene14213:106607496, gene15130:106608294, gene23183:106562338, gene23243:106562395, gene26276:106565395, gene26325:106565435, gene27505:106566425, gene4157:106582110, gene44423:106583303, gene46608:106585589, gene51060:106589531, gene7293:106600825, gene7609:106601241	0.00156
221	BP	GO:0048514	blood vessel morphogenesis	gene10457:106603906, gene10527:100136800, gene1056:106604578, gene1080:106604807, gene10856:106604211, gene10970:106604332, gene11070:106604507, gene11179:106604533, gene12207:106605553, gene12423:106605774, gene13721:106606950, gene13936:106607176, gene13950:106607162, gene13951:106607161, gene14257:106607467, gene14611:106607799, gene15093:106608273, gene20083:106613089, gene20824:106613792, ge…	0.0016
222	BP	GO:0007601	visual perception	gene1080:106604807, gene1131:106605231, gene12423:106605774, gene13721:106606950, gene13950:106607162, gene16790:106609880, gene1970:106560625, gene20083:106613089, gene2289:106563782, gene25948:106565282, gene27545:106566484, gene28816:106567683, gene28999:106567892, gene29462:106568409, gene37891:106576803, gene38359:106577235, gene44404:106583168, gene47850:106586618, gene48544:101448035, gene…	0.00163
223	BP	GO:0051897	positive regulation of protein kinase B ...	gene21522:100136550, gene2424:106565855, gene25518:106564678, gene28159:106567054, gene29744:106568655, gene33354:106572111, gene45253:106584018, gene45864:106584595, gene47183:106585936, gene4771:106587077, gene48593:106587351, gene49296:106588073, gene50825:106589334, gene51739:106590189, gene52183:106590649, gene52216:106590679, gene6523:106599727, gene66372:106592162	0.00164
224	BP	GO:0009409	response to cold	gene1027:106604361, gene14984:106608192, gene15130:106608294, gene15578:106608616, gene18957:106611923, gene29506:106568426, gene32862:100380418, gene38727:106577610, gene40176:106579329, gene44237:106583131, gene46592:106585604, gene48141:106586902, gene51747:106590195, gene51997:106590454, gene771:106601178, gene8303:106601937	0.00167
225	BP	GO:0032354	response to follicle-stimulating hormone	gene1027:106604361, gene10457:106603906, gene1080:106604807, gene15578:106608616, gene18957:106611923, gene37891:106576803, gene38727:106577610	0.00168
226	BP	GO:1990314	cellular response to insulin-like growth...	gene20142:106613130, gene39631:106578540, gene49296:106588073, gene61406:106595963, gene66372:106592162, gene78169:106595265	0.00171
227	BP	GO:0007474	imaginal disc-derived wing vein specific...	gene25538:106564658, gene27286:106566241, gene34283:106573116, gene48968:106587736, gene66786:106592057, gene9450:106602898	0.00171
228	BP	GO:0010871	negative regulation of receptor biosynth...	gene11900:100136378, gene14213:106607496, gene21752:100136415, gene4157:106582110, gene44423:106583303, gene7293:106600825	0.00171
229	BP	GO:0046324	regulation of glucose import	gene14680:106607855, gene15601:106608778, gene15977:106609064, gene21338:106560529, gene21770:106560977, gene28159:106567054, gene29744:106568655, gene36161:106575127, gene36226:106575138, gene41882:106580735, gene43220:106582130, gene46412:106585059, gene4714:106587516, gene47911:106586664, gene49296:106588073, gene50301:106588785, gene66372:106592162	0.00174
230	BP	GO:0051402	neuron apoptotic process	gene1027:106604361, gene10424:106603870, gene10457:106603906, gene13936:106607176, gene13951:106607161, gene14776:106607967, gene15578:106608616, gene18957:106611923, gene19906:106612804, gene21595:106560763, gene21822:106560921, gene22237:106561392, gene23183:106562338, gene23243:106562395, gene2377:106564765, gene23833:106562976, gene28159:106567054, gene28336:100194884, gene28999:106567892, ge…	0.00196
231	BP	GO:0002903	negative regulation of B cell apoptotic ...	gene15601:106608778, gene21413:106560604, gene28427:106567280, gene36161:106575127, gene43220:106582130, gene47911:106586664	0.00197
232	BP	GO:0071228	cellular response to tumor cell	gene20633:106613622, gene23866:106563080, gene2731:106568345	0.00197
233	BP	GO:0043376	regulation of CD8-positive, alpha-beta T...	gene12439:106605788, gene20799:106613773, gene29552:106568492	0.00197
234	BP	GO:0071873	response to norepinephrine	gene1027:106604361, gene10457:106603906, gene15578:106608616, gene18957:106611923, gene38727:106577610	0.00201
235	BP	GO:0048771	tissue remodeling	gene1027:106604361, gene12423:106605774, gene13721:106606950, gene13950:106607162, gene14239:106607477, gene14611:106607799, gene15093:106608273, gene15578:106608616, gene18339:106611380, gene22999:106562092, gene24024:106563326, gene27600:106566511, gene27670:106566571, gene2772:106568685, gene28159:106567054, gene29157:106567758, gene30436:106569329, gene38359:106577235, gene38727:106577610, ge…	0.00202
236	BP	GO:0001816	cytokine production	gene1080:106604807, gene12207:106605553, gene12283:106605616, gene15093:106608273, gene16790:106609880, gene18767:106611738, gene21150:106560326, gene21338:106560529, gene21410:106560600, gene21413:106560604, gene22999:106562092, gene23369:106562516, gene23625:106562779, gene2424:106565855, gene2536:106566762, gene25803:106564804, gene2772:106568685, gene28044:106567318, gene28336:100194884, gene…	0.0021
237	BP	GO:0060397	JAK-STAT cascade involved in growth horm...	gene15601:106608778, gene15977:106609064, gene28441:106567289, gene31906:106570769, gene48998:106587767, gene66786:106592057, gene8278:106601915	0.00211
238	BP	GO:0043129	surfactant homeostasis	gene12423:106605774, gene13721:106606950, gene13950:106607162, gene28159:106567054, gene51060:106589531, gene51273:106589722, gene7609:106601241	0.00211
239	BP	GO:0045777	positive regulation of blood pressure	gene10970:106604332, gene14486:106607709, gene22116:106561324, gene26712:106565791, gene27412:106566362, gene32389:100196381, gene35233:106574152, gene43885:106582617, gene45278:106584037, gene45307:106584062, gene46592:106585604	0.00214
240	BP	GO:2000505	regulation of energy homeostasis	gene1027:106604361, gene11900:100136378, gene14213:106607496, gene15578:106608616, gene18957:106611923, gene38727:106577610, gene4157:106582110, gene41770:100196588, gene44423:106583303, gene7293:106600825	0.0022
241	BP	GO:0046330	positive regulation of JNK cascade	gene10549:106603990, gene17148:100380732, gene21150:106560326, gene22237:106561392, gene23833:106562976, gene2424:106565855, gene2536:106566762, gene25803:106564804, gene29157:106567758, gene29763:100195489, gene30132:106568833, gene3025:106571505, gene31906:106570769, gene38253:106577099, gene38257:106577155, gene42681:106581531, gene45005:106583767, gene45383:106584172, gene47264:106586018, gen…	0.00224
242	BP	GO:0014741	negative regulation of muscle hypertroph...	gene21124:106560302, gene26325:106565435, gene29156:106567763, gene36226:106575138, gene41235:106579965, gene6061:106598526	0.00225
243	BP	GO:0071332	cellular response to fructose stimulus	gene1027:106604361, gene15578:106608616, gene18957:106611923, gene38727:106577610	0.00227
244	BP	GO:0031585	regulation of inositol 1,4,5-trisphospha...	gene2289:106563782, gene30082:106568874, gene8456:106602089, gene8475:106602109	0.00227
245	BP	GO:0014910	regulation of smooth muscle cell migrati...	gene1027:106604361, gene1080:106604807, gene11179:106604533, gene13936:106607176, gene15578:106608616, gene17163:106610255, gene18767:106611738, gene18957:106611923, gene21752:100136415, gene2772:106568685, gene37891:106576803, gene38727:106577610, gene44168:106583001, gene45278:106584037, gene50696:106589124, gene52183:106590649, gene9509:106602948	0.00231
246	BP	GO:0071415	cellular response to purine-containing c...	gene1027:106604361, gene15578:106608616, gene18767:106611738, gene18957:106611923, gene38727:106577610	0.00237
247	BP	GO:0044849	estrous cycle	gene1080:106604807, gene10970:106604332, gene19986:106613013, gene34008:106572869, gene37891:106576803, gene49296:106588073, gene66372:106592162	0.00261
248	BP	GO:0035640	exploration behavior	gene40249:106579263, gene44404:106583168, gene45561:106584319, gene46630:106585568, gene47448:106586218, gene61616:106594092, gene7248:106600863, gene7946:106601574	0.00265
249	BP	GO:0014898	cardiac muscle hypertrophy in response t...	gene13936:106607176, gene22999:106562092, gene29346:106568136, gene31696:106570557, gene37862:106576825, gene44237:106583131, gene48548:106587185, gene48856:106587624	0.00265
250	BP	GO:1900034	regulation of cellular response to heat	gene19986:106613013, gene26209:106565346, gene32862:100380418, gene34008:106572869, gene36226:106575138, gene44582:100196052, gene48998:106587767, gene5189:106591679, gene66786:106592057, gene7092:106600736, gene7385:106601018, gene7530:106601159, gene80:106599806	0.00267
251	BP	GO:0030073	insulin secretion	gene11179:106604533, gene11900:100136378, gene12863:106606205, gene13172:106606520, gene14213:106607496, gene14486:106607709, gene15601:106608778, gene15977:106609064, gene21752:100136415, gene2182:106562596, gene22400:100136366, gene2289:106563782, gene24024:106563326, gene26276:106565395, gene29145:106567770, gene29346:106568136, gene29744:106568655, gene30144:106568821, gene31753:106570612, ge…	0.00267
252	BP	GO:0006111	regulation of gluconeogenesis	gene1027:106604361, gene11900:100136378, gene14213:106607496, gene14239:106607477, gene14776:106607967, gene19475:106612460, gene21752:100136415, gene21822:106560921, gene29744:106568655, gene31906:106570769, gene34384:106573190, gene38727:106577610, gene4157:106582110, gene44423:106583303, gene50303:106588784, gene7265:106600850, gene7293:106600825	0.00268
253	BP	GO:0071222	cellular response to lipopolysaccharide	gene1027:106604361, gene11900:100136378, gene14213:106607496, gene14611:106607799, gene15578:106608616, gene16790:106609880, gene18767:106611738, gene18957:106611923, gene21752:100136415, gene23833:106562976, gene33633:106572480, gene38124:106577006, gene38727:106577610, gene39308:106578207, gene39327:106578226, gene4157:106582110, gene43038:106581900, gene44423:106583303, gene45278:106584037, ge…	0.00268
254	BP	GO:0071354	cellular response to interleukin-6	gene1027:106604361, gene15578:106608616, gene17148:100380732, gene18957:106611923, gene31906:106570769, gene38727:106577610, gene44393:106583179, gene67455:106594839, gene771:106601178	0.00271
255	BP	GO:0051240	positive regulation of multicellular org...	gene10012:106603555, gene10188:106603639, gene1027:106604361, gene10424:106603870, gene10457:106603906, gene10487:106603933, gene10527:100136800, gene1080:106604807, gene10856:106604211, gene10970:106604332, gene11179:106604533, gene11802:106605147, gene12207:106605553, gene12283:106605616, gene1267:106608700, gene12957:106606308, gene13469:106606823, gene13936:106607176, gene13951:106607161, gen…	0.00272
256	BP	GO:0019373	epoxygenase P450 pathway	gene1080:106604807, gene37891:106576803, gene45307:106584062, gene51736:106590187	0.00285
257	BP	GO:2000507	positive regulation of energy homeostasi...	gene1027:106604361, gene15578:106608616, gene18957:106611923, gene38727:106577610	0.00285
258	BP	GO:0043201	response to leucine	gene1027:106604361, gene15578:106608616, gene18957:106611923, gene38727:106577610	0.00285
259	BP	GO:0009804	coumarin metabolic process	gene1080:106604807, gene37891:106576803, gene51736:106590187	0.00288
260	BP	GO:0001822	kidney development	gene10188:106603639, gene10424:106603870, gene10457:106603906, gene1056:106604578, gene12207:106605553, gene12283:106605616, gene14611:106607799, gene15723:106608847, gene18047:106611136, gene19986:106613013, gene22116:106561324, gene25948:106565282, gene26276:106565395, gene26325:106565435, gene26712:106565791, gene2715:106567959, gene27545:106566484, gene28770:106567727, gene28816:106567683, ge…	0.00289
261	BP	GO:0040015	negative regulation of multicellular org...	gene26108:106565139, gene26826:106565979, gene28441:106567289, gene46302:106585152, gene46592:106585604, gene4678:100194498	0.0029
262	BP	GO:0034063	stress granule assembly	gene27768:106566609, gene31739:106570615, gene31768:106570635, gene36639:106575550, gene42649:106581490, gene50301:106588785	0.0029
263	BP	GO:0061157	mRNA destabilization	gene10424:106603870, gene31739:106570615, gene31768:106570635, gene39262:106578158, gene42649:106581490, gene45475:106584219	0.0029
264	BP	GO:0050767	regulation of neurogenesis	gene10012:106603555, gene10079:106603496, gene10188:106603639, gene10424:106603870, gene10664:106604092, gene11179:106604533, gene11413:106604757, gene12283:106605616, gene12957:106606308, gene14486:106607709, gene15093:106608273, gene18767:106611738, gene18791:106611717, gene20407:106613394, gene20799:106613773, gene21413:106560604, gene21564:106560790, gene21822:106560921, gene22012:106561177, …	0.00311
265	BP	GO:0006954	inflammatory response	gene10970:106604332, gene11900:100136378, gene12207:106605553, gene13936:106607176, gene14213:106607496, gene14486:106607709, gene21413:106560604, gene21564:106560790, gene21752:100136415, gene22974:106562111, gene23833:106562976, gene25257:106564400, gene27670:106566571, gene2772:106568685, gene28336:100194884, gene28427:106567280, gene2866:106569712, gene28816:106567683, gene29145:106567770, ge…	0.00315
266	BP	GO:0031649	heat generation	gene14486:106607709, gene20633:106613622, gene23866:106563080, gene2731:106568345, gene29506:106568426, gene31953:106570815, gene39308:106578207, gene46592:106585604	0.00321
267	BP	GO:0031016	pancreas development	gene14239:106607477, gene15093:106608273, gene21522:100136550, gene26276:106565395, gene26325:106565435, gene29145:106567770, gene33614:106572462, gene35975:106574900, gene36226:106575138, gene37389:106576285, gene40719:100136506, gene41894:100136356, gene44744:106583415, gene45864:106584595, gene46613:100196040, gene49103:106587875, gene49296:106588073, gene497:106589077, gene6530:106599739, gen…	0.00321
268	BP	GO:0051223	regulation of protein transport	gene11179:106604533, gene11802:106605147, gene11900:100136378, gene12863:106606205, gene13172:106606520, gene14213:106607496, gene14486:106607709, gene15601:106608778, gene15977:106609064, gene16590:106609675, gene21109:106560292, gene21338:106560529, gene21752:100136415, gene2182:106562596, gene22400:100136366, gene22518:106561677, gene23625:106562779, gene23833:106562976, gene24024:106563326, g…	0.00326
269	BP	GO:0009967	positive regulation of signal transducti...	gene10079:106603496, gene10549:106603990, gene1080:106604807, gene10970:106604332, gene11179:106604533, gene11802:106605147, gene12207:106605553, gene1267:106608700, gene14333:106607549, gene14611:106607799, gene15093:106608273, gene15601:106608778, gene15778:106608879, gene15977:106609064, gene16590:106609675, gene16790:106609880, gene17148:100380732, gene19306:106612291, gene2035:106561271, gen…	0.00333
270	BP	GO:0031532	actin cytoskeleton reorganization	gene12957:106606308, gene18872:106611857, gene20229:106613218, gene20824:106613792, gene25405:106564551, gene25538:106564658, gene28479:106567379, gene31906:106570769, gene320:106570052, gene32237:106571085, gene3388:106574328, gene34352:106573205, gene41365:106579856, gene45253:106584018, gene45561:106584319, gene46444:106585038, gene49296:106588073, gene56763:106595050, gene66372:106592162, gen…	0.00338
271	BP	GO:0046651	lymphocyte proliferation	gene12283:106605616, gene12863:106606205, gene15601:106608778, gene20594:106613585, gene21413:106560604, gene21522:100136550, gene26276:106565395, gene28336:100194884, gene29346:106568136, gene31753:106570612, gene31953:106570815, gene32875:106571579, gene32894:106571561, gene33633:106572480, gene35104:106573984, gene36161:106575127, gene3772:106577891, gene42294:106581151, gene42905:106581841, g…	0.0034
272	BP	GO:0002076	osteoblast development	gene13936:106607176, gene30436:106569329, gene31696:106570557, gene41882:106580735, gene43823:106582669, gene48806:106587570, gene49103:106587875, gene6589:106599896	0.00345
273	BP	GO:0002866	positive regulation of acute inflammator...	gene14486:106607709, gene29763:100195489, gene51739:106590189, gene5779:106597311	0.00351
274	BP	GO:0071879	positive regulation of adrenergic recept...	gene20633:106613622, gene23866:106563080, gene2731:106568345, gene36226:106575138	0.00351
275	BP	GO:0030336	negative regulation of cell migration	gene1027:106604361, gene1080:106604807, gene13936:106607176, gene15093:106608273, gene15578:106608616, gene17163:106610255, gene18957:106611923, gene21752:100136415, gene23833:106562976, gene2772:106568685, gene28033:106566773, gene28159:106567054, gene29157:106567758, gene32079:106570941, gene36226:106575138, gene37138:106576039, gene37891:106576803, gene38359:106577235, gene38727:106577610, gen…	0.00353
276	BP	GO:0007455	eye-antennal disc morphogenesis	gene15093:106608273, gene25948:106565282, gene46302:106585152, gene497:106589077, gene52198:106590661, gene77836:106592414	0.00368
277	BP	GO:0021988	olfactory lobe development	gene25894:106565042, gene26712:106565791, gene2715:106567959, gene28033:106566773, gene28159:106567054, gene30708:106569597, gene31066:106570050, gene32389:100196381, gene41365:106579856, gene50434:106588860, gene6290:106599585, gene70325:106593181, gene8456:106602089, gene8475:106602109	0.00372
278	BP	GO:0055072	iron ion homeostasis	gene12423:106605774, gene13721:106606950, gene13950:106607162, gene15126:106608296, gene21390:106560584, gene24198:106563184, gene29744:106568655, gene40779:106579614, gene49010:106587779, gene4980:106590030, gene5016:106590330, gene51060:106589531, gene51273:106589722, gene68650:106593961, gene7609:106601241, gene8456:106602089, gene8475:106602109	0.00375
279	BP	GO:0007176	regulation of epidermal growth factor-ac...	gene20824:106613792, gene21770:106560977, gene25498:106564692, gene31906:106570769, gene43141:106581983, gene43885:106582617, gene44222:100380427, gene49278:106588053	0.00375
280	BP	GO:0010907	positive regulation of glucose metabolic...	gene1027:106604361, gene14776:106607967, gene15601:106608778, gene15977:106609064, gene19878:106612828, gene21522:100136550, gene21752:100136415, gene31906:106570769, gene34384:106573190, gene36161:106575127, gene38727:106577610, gene43220:106582130, gene47911:106586664, gene49296:106588073, gene66372:106592162, gene9509:106602948	0.00381
281	BP	GO:0060213	positive regulation of nuclear-transcrib...	gene10424:106603870, gene30887:106569767, gene31768:106570635, gene42649:106581490, gene45475:106584219, gene49703:100380831, gene57355:106592182	0.00391
282	BP	GO:0031651	negative regulation of heat generation	gene20633:106613622, gene23866:106563080, gene2731:106568345	0.00401
283	BP	GO:0042167	heme catabolic process	gene4980:106590030, gene5016:106590330, gene6469:106599287	0.00401
284	BP	GO:2000288	positive regulation of myoblast prolifer...	gene10527:100136800, gene21752:100136415, gene26276:106565395	0.00401
285	BP	GO:0090327	negative regulation of locomotion involv...	gene20633:106613622, gene23866:106563080, gene2731:106568345	0.00401
286	BP	GO:0000302	response to reactive oxygen species	gene1027:106604361, gene1080:106604807, gene14239:106607477, gene14776:106607967, gene15578:106608616, gene18957:106611923, gene18991:106611988, gene19986:106613013, gene20083:106613089, gene20824:106613792, gene2424:106565855, gene2536:106566762, gene28159:106567054, gene2884:106569805, gene30144:106568821, gene30228:106569079, gene31753:106570612, gene34008:106572869, gene35671:106574566, gene3…	0.00405
287	BP	GO:0030225	macrophage differentiation	gene14611:106607799, gene17148:100380732, gene23183:106562338, gene23243:106562395, gene26712:106565791, gene28336:100194884, gene30398:100196464, gene31906:106570769, gene32389:100196381, gene33633:106572480, gene46613:100196040	0.00406
288	BP	GO:0008630	intrinsic apoptotic signaling pathway in...	gene16678:106609765, gene21338:106560529, gene22237:106561392, gene22974:106562111, gene30708:106569597, gene37975:106576729, gene38359:106577235, gene41035:106580137, gene41550:106580473, gene45005:106583767, gene45561:106584319, gene48856:106587624, gene4980:106590030, gene5016:106590330, gene5057:106590657, gene5400:106593639, gene6559:100195174, gene7489:106601088, gene7530:106601159, gene787…	0.00413
289	BP	GO:0032496	response to lipopolysaccharide	gene1027:106604361, gene1080:106604807, gene11332:106604687, gene11900:100136378, gene14213:106607496, gene14486:106607709, gene14611:106607799, gene15130:106608294, gene15578:106608616, gene16790:106609880, gene18767:106611738, gene18957:106611923, gene21752:100136415, gene23833:106562976, gene2772:106568685, gene28336:100194884, gene28427:106567280, gene2866:106569712, gene29763:100195489, gene…	0.00415
290	BP	GO:0000271	polysaccharide biosynthetic process	gene11900:100136378, gene14213:106607496, gene15601:106608778, gene15977:106609064, gene19878:106612828, gene21522:100136550, gene2772:106568685, gene2866:106569712, gene31066:106570050, gene34462:106573329, gene36226:106575138, gene4157:106582110, gene43220:106582130, gene44423:106583303, gene46412:106585059, gene47911:106586664, gene49070:106587841, gene49296:106588073, gene50301:106588785, gen…	0.00415
291	BP	GO:0031346	positive regulation of cell projection o...	gene10424:106603870, gene11179:106604533, gene12957:106606308, gene12981:106606328, gene13936:106607176, gene14486:106607709, gene17163:106610255, gene18767:106611738, gene18791:106611717, gene20229:106613218, gene21822:106560921, gene22012:106561177, gene22518:106561677, gene22904:106562167, gene23795:106562945, gene23833:106562976, gene24024:106563326, gene25498:106564692, gene2715:106567959, g…	0.00424
292	BP	GO:0043551	regulation of phosphatidylinositol 3-kin...	gene15601:106608778, gene21338:106560529, gene21595:106560763, gene23833:106562976, gene2424:106565855, gene25518:106564678, gene28159:106567054, gene35265:106574180, gene41365:106579856, gene45253:106584018, gene4771:106587077, gene51739:106590189	0.00426
293	BP	GO:0014878	response to electrical stimulus involved...	gene1027:106604361, gene15578:106608616, gene18957:106611923, gene38727:106577610	0.00427
294	BP	GO:1900246	positive regulation of RIG-I signaling p...	gene31739:106570615, gene31768:106570635, gene39262:106578158, gene42649:106581490	0.00427
295	BP	GO:0006390	transcription from mitochondrial promote...	gene1027:106604361, gene15578:106608616, gene20142:106613130, gene38727:106577610	0.00427
296	BP	GO:0045663	positive regulation of myoblast differen...	gene10527:100136800, gene13951:106607161, gene21338:106560529, gene24384:106563418, gene37348:106576243, gene57355:106592182, gene67436:106592886, gene9509:106602948	0.00443
297	BP	GO:0055117	regulation of cardiac muscle contraction	gene10487:106603933, gene11802:106605147, gene13936:106607176, gene18791:106611717, gene21124:106560302, gene26298:106565408, gene30082:106568874, gene31753:106570612, gene32862:100380418, gene33662:106572525, gene41235:106579965, gene42940:106581811, gene43038:106581900, gene43885:106582617, gene45278:106584037, gene46592:106585604, gene47988:106586777, gene51441:106589891, gene6061:106598526	0.00443
298	BP	GO:0007215	glutamate receptor signaling pathway	gene1027:106604361, gene10424:106603870, gene15578:106608616, gene18957:106611923, gene21015:106613957, gene23906:106563047, gene38727:106577610, gene45475:106584219, gene47085:106585836, gene49803:106588444, gene67436:106592886, gene7946:106601574, gene9956:106603600	0.00456
299	BP	GO:0009966	regulation of signal transduction	gene10012:106603555, gene10079:106603496, gene1027:106604361, gene10457:106603906, gene10549:106603990, gene10664:106604092, gene1080:106604807, gene10970:106604332, gene11179:106604533, gene11802:106605147, gene11870:100195869, gene11900:100136378, gene12207:106605553, gene1267:106608700, gene13405:106606801, gene13951:106607161, gene14213:106607496, gene14239:106607477, gene14257:106607467, gen…	0.00456
300	BP	GO:0045475	locomotor rhythm	gene1851:106611671, gene23340:106562490, gene25538:106564658, gene26712:106565791, gene28692:106567574, gene29145:106567770, gene32389:100196381, gene36226:106575138, gene80503:106591314	0.00459
301	CC	GO:0005887	integral component of plasma membrane	gene10660:106604089, gene10970:106604332, gene11179:106604533, gene11802:106605147, gene13172:106606520, gene13298:106606647, gene14257:106607467, gene1426:106609185, gene14486:106607709, gene14611:106607799, gene15126:106608296, gene15601:106608778, gene15708:106608835, gene16405:106609517, gene16406:106609518, gene16790:106609880, gene16874:106609958, gene1834:106611875, gene1851:106611671, gen…	1.4e-06
302	CC	GO:0097440	apical dendrite	gene1027:106604361, gene10424:106603870, gene15578:106608616, gene18957:106611923, gene21015:106613957, gene25498:106564692, gene38727:106577610, gene40183:106579321, gene41447:106580333, gene44404:106583168, gene45475:106584219	1.4e-05
303	CC	GO:0043025	neuronal cell body	gene1027:106604361, gene10970:106604332, gene11179:106604533, gene12957:106606308, gene14680:106607855, gene15578:106608616, gene16405:106609517, gene16590:106609675, gene18047:106611136, gene1851:106611671, gene18791:106611717, gene18957:106611923, gene19122:106612116, gene19414:106612392, gene19986:106613013, gene21015:106613957, gene2289:106563782, gene2377:106564765, gene23795:106562945, gene…	5.4e-05
304	CC	GO:0043197	dendritic spine	gene10970:106604332, gene11179:106604533, gene11900:100136378, gene12957:106606308, gene14213:106607496, gene19414:106612392, gene19986:106613013, gene227:106612547, gene2289:106563782, gene25498:106564692, gene32237:106571085, gene33354:106572111, gene3388:106574328, gene34008:106572869, gene36226:106575138, gene37138:106576039, gene41235:106579965, gene4157:106582110, gene42681:106581531, gene4…	8.2e-05
305	CC	GO:0016323	basolateral plasma membrane	gene11179:106604533, gene11802:106605147, gene14257:106607467, gene15708:106608835, gene16590:106609675, gene18767:106611738, gene19948:106612936, gene21015:106613957, gene21390:106560584, gene22400:100136366, gene22974:106562111, gene23207:100136926, gene27670:106566571, gene28159:106567054, gene28816:106567683, gene29552:106568492, gene29582:106568503, gene2979:100136908, gene30307:106569207, g…	0.00015
306	CC	GO:0000932	cytoplasmic mRNA processing body	gene13954:106607159, gene20407:106613394, gene20594:106613585, gene21932:106560824, gene30887:106569767, gene31739:106570615, gene31768:106570635, gene34008:106572869, gene39262:106578158, gene42649:106581490, gene48806:106587570, gene49703:100380831, gene50592:106589020, gene51997:106590454, gene6198:106599024, gene6892:106600575	0.00068
307	CC	GO:0044459	plasma membrane part	gene10487:106603933, gene10660:106604089, gene10970:106604332, gene11179:106604533, gene11802:106605147, gene12163:106605512, gene12207:106605553, gene12841:106606185, gene12863:106606205, gene13172:106606520, gene13298:106606647, gene13469:106606823, gene14257:106607467, gene1426:106609185, gene14333:106607549, gene14486:106607709, gene14511:106607729, gene14611:106607799, gene14878:106608063, g…	0.00097
308	CC	GO:0043235	receptor complex	gene10970:106604332, gene13172:106606520, gene15601:106608778, gene19906:106612804, gene22974:106562111, gene2536:106566762, gene25803:106564804, gene26498:106565668, gene2715:106567959, gene27412:106566362, gene28159:106567054, gene30144:106568821, gene30436:106569329, gene33222:106572218, gene3388:106574328, gene37862:106576825, gene40249:106579263, gene40719:100136506, gene41235:106579965, gen…	0.00105
309	CC	GO:0030057	desmosome	gene26813:106565964, gene27670:106566571, gene29294:106568245, gene34106:106572961, gene34114:106572968, gene34117:106572971, gene43968:106582810, gene78436:106594316	0.00151
310	CC	GO:0016442	RISC complex	gene20407:106613394, gene30887:106569767, gene36639:106575550, gene48806:106587570, gene49703:100380831, gene6892:106600575	0.0016
311	CC	GO:0014069	postsynaptic density	gene10424:106603870, gene12957:106606308, gene14239:106607477, gene14878:106608063, gene16590:106609675, gene19414:106612392, gene19986:106613013, gene22012:106561177, gene23833:106562976, gene23906:106563047, gene25498:106564692, gene28159:106567054, gene29157:106567758, gene29294:106568245, gene31768:106570635, gene32237:106571085, gene34008:106572869, gene36226:106575138, gene37138:106576039, …	0.00252
312	CC	GO:0036488	CHOP-C/EBP complex	gene28336:100194884, gene30398:100196464, gene33633:106572480	0.00277
313	CC	GO:0035189	Rb-E2F complex	gene23183:106562338, gene23243:106562395, gene28336:100194884, gene30398:100196464	0.00335
314	CC	GO:0060076	excitatory synapse	gene10424:106603870, gene11179:106604533, gene12957:106606308, gene14239:106607477, gene14878:106608063, gene16590:106609675, gene19414:106612392, gene19986:106613013, gene22012:106561177, gene23833:106562976, gene23906:106563047, gene25498:106564692, gene2715:106567959, gene28159:106567054, gene29157:106567758, gene29294:106568245, gene31768:106570635, gene31999:106570851, gene32237:106571085, g…	0.0054
315	CC	GO:0016581	NuRD complex	gene12063:106605451, gene21770:106560977, gene25894:106565042, gene4000:106580205, gene5057:106590657, gene5400:106593639, gene6290:106599585, gene78739:106594921	0.0056
316	CC	GO:0005901	caveola	gene10970:106604332, gene15601:106608778, gene1851:106611671, gene24024:106563326, gene28159:106567054, gene29294:106568245, gene29506:106568426, gene35671:106574566, gene42129:106580986, gene42640:106581491, gene44393:106583179, gene46248:106585191, gene46302:106585152, gene4714:106587516, gene48998:106587767, gene49296:106588073, gene4980:106590030, gene5016:106590330, gene66372:106592162, gene…	0.00698
317	CC	GO:0031594	neuromuscular junction	gene12863:106606205, gene13936:106607176, gene15093:106608273, gene24024:106563326, gene29156:106567763, gene31768:106570635, gene31999:106570851, gene3388:106574328, gene39564:106578473, gene3980:106580063, gene42649:106581490, gene44299:106583079, gene46248:106585191, gene48968:106587736, gene497:106589077, gene66786:106592057, gene9668:106603118	0.00755
318	CC	GO:0044463	cell projection part	gene10424:106603870, gene10970:106604332, gene11179:106604533, gene11900:100136378, gene12863:106606205, gene12957:106606308, gene14213:106607496, gene14239:106607477, gene14257:106607467, gene14486:106607709, gene14878:106608063, gene15601:106608778, gene16590:106609675, gene16790:106609880, gene1697:106613059, gene1851:106611671, gene18791:106611717, gene18872:106611857, gene19414:106612392, ge…	0.00803
319	CC	GO:0045211	postsynaptic membrane	gene1851:106611671, gene19414:106612392, gene22012:106561177, gene23906:106563047, gene27776:106566761, gene28159:106567054, gene28381:106567312, gene29156:106567763, gene37138:106576039, gene39564:106578473, gene41235:106579965, gene41906:106580757, gene42940:106581811, gene43885:106582617, gene44299:106583079, gene44392:106583180, gene46630:106585568, gene47085:106585836, gene49803:106588444, g…	0.00811
320	CC	GO:0042734	presynaptic membrane	gene12163:106605512, gene14257:106607467, gene1851:106611671, gene31999:106570851, gene36296:106575175, gene39564:106578473, gene41235:106579965, gene43885:106582617, gene44299:106583079, gene47448:106586218, gene53461:106597306, gene71293:106594275, gene9916:106603240	0.00955
321	CC	GO:0016324	apical plasma membrane	gene11179:106604533, gene11802:106605147, gene16590:106609675, gene16790:106609880, gene1851:106611671, gene18767:106611738, gene18872:106611857, gene21390:106560584, gene22400:100136366, gene22974:106562111, gene25538:106564658, gene28159:106567054, gene28816:106567683, gene2979:100136908, gene30307:106569207, gene30436:106569329, gene32862:100380418, gene34009:106572868, gene35671:106574566, ge…	0.00962
322	CC	GO:0030867	rough endoplasmic reticulum membrane	gene22400:100136366, gene34106:106572961, gene34114:106572968, gene34117:106572971, gene78436:106594316	0.00969
323	CC	GO:0010494	cytoplasmic stress granule	gene20407:106613394, gene20594:106613585, gene30755:106569640, gene31672:106570533, gene31739:106570615, gene31768:106570635, gene36639:106575550, gene39262:106578158, gene42649:106581490, gene50301:106588785, gene6892:106600575	0.00987
324	CC	GO:0031230	intrinsic component of cell outer membra...	gene38124:106577006, gene39327:106578226	0.01066
325	CC	GO:0045203	integral component of cell outer membran...	gene38124:106577006, gene39327:106578226	0.01066
326	CC	GO:0001891	phagocytic cup	gene16790:106609880, gene3055:106571866, gene40183:106579321, gene41365:106579856, gene45561:106584319, gene46444:106585038, gene8765:106602328	0.0116
327	CC	GO:0030054	cell junction	gene10487:106603933, gene11179:106604533, gene11600:106604954, gene11802:106605147, gene12163:106605512, gene12841:106606185, gene12957:106606308, gene14239:106607477, gene14257:106607467, gene14511:106607729, gene14611:106607799, gene14680:106607855, gene15093:106608273, gene17163:106610255, gene18339:106611380, gene18791:106611717, gene18872:106611857, gene19122:106612116, gene19306:106612291, …	0.01371
328	CC	GO:0048471	perinuclear region of cytoplasm	gene10012:106603555, gene10424:106603870, gene10487:106603933, gene1056:106604578, gene11179:106604533, gene11332:106604687, gene11802:106605147, gene15093:106608273, gene16790:106609880, gene17163:106610255, gene18047:106611136, gene1851:106611671, gene19986:106613013, gene21338:106560529, gene21390:106560584, gene2289:106563782, gene23207:100136926, gene27545:106566484, gene27768:106566609, gen…	0.01374
329	CC	GO:0045095	keratin filament	gene36715:106575629, gene36721:106575639, gene36722:106575637, gene4685:106587804, gene4690:100195545	0.01451
330	CC	GO:0005944	phosphatidylinositol 3-kinase complex, c...	gene25518:106564678, gene4771:106587077	0.01563
331	CC	GO:0061177	type Is terminal bouton	gene31768:106570635, gene42649:106581490	0.01563
332	CC	GO:0030424	axon	gene10424:106603870, gene10664:106604092, gene10970:106604332, gene11179:106604533, gene11600:106604954, gene14486:106607709, gene16405:106609517, gene18047:106611136, gene1851:106611671, gene18791:106611717, gene19986:106613013, gene21109:106560292, gene2289:106563782, gene23625:106562779, gene2377:106564765, gene23833:106562976, gene23906:106563047, gene24198:106563184, gene25312:106564461, gen…	0.01723
333	CC	GO:0072686	mitotic spindle	gene1131:106605231, gene18872:106611857, gene29294:106568245, gene34384:106573190, gene36226:106575138, gene42129:106580986, gene42253:106581181, gene46412:106585059, gene46454:106585026, gene48968:106587736, gene51876:106590329, gene66786:106592057, gene8537:106602231	0.01747
334	CC	GO:0030313	cell envelope	gene38124:106577006, gene39327:106578226, gene41235:106579965	0.01836
335	CC	GO:0009279	cell outer membrane	gene38124:106577006, gene39327:106578226, gene41235:106579965	0.01836
336	CC	GO:0071598	neuronal ribonucleoprotein granule	gene21109:106560292, gene8456:106602089, gene8475:106602109	0.01836
337	CC	GO:0048786	presynaptic active zone	gene1851:106611671, gene31999:106570851, gene43885:106582617, gene47448:106586218, gene48971:106587740, gene61616:106594092, gene7946:106601574, gene80503:106591314	0.019
338	CC	GO:0031226	intrinsic component of plasma membrane	gene10660:106604089, gene10970:106604332, gene11179:106604533, gene11802:106605147, gene13172:106606520, gene13298:106606647, gene14257:106607467, gene1426:106609185, gene14333:106607549, gene14486:106607709, gene14611:106607799, gene15126:106608296, gene15601:106608778, gene15708:106608835, gene16405:106609517, gene16406:106609518, gene16790:106609880, gene16874:106609958, gene1834:106611875, ge…	0.02112
339	CC	GO:0061176	type Ib terminal bouton	gene31768:106570635, gene42649:106581490	0.0214
340	CC	GO:0031235	intrinsic component of the cytoplasmic s...	gene14333:106607549, gene23833:106562976, gene29157:106567758, gene9668:106603118	0.02198
341	CC	GO:0005903	brush border	gene11179:106604533, gene16405:106609517, gene17163:106610255, gene18872:106611857, gene2289:106563782, gene27670:106566571, gene29506:106568426, gene30436:106569329, gene32862:100380418, gene3388:106574328, gene3506:106575505, gene35671:106574566, gene37490:100306766, gene3906:106579373, gene40183:106579321, gene43983:106582826, gene47866:106586629, gene6589:106599896, gene7946:106601574, gene87…	0.02356
342	CC	GO:0005828	kinetochore microtubule	gene20799:106613773, gene29552:106568492, gene4106:100286660, gene46454:106585026, gene49230:106588008	0.02439
343	CC	GO:0017053	transcriptional repressor complex	gene10079:106603496, gene10188:106603639, gene10664:106604092, gene12063:106605451, gene12283:106605616, gene13936:106607176, gene17163:106610255, gene18944:106611936, gene21770:106560977, gene25894:106565042, gene28770:106567727, gene30708:106569597, gene31696:106570557, gene3772:106577891, gene4000:106580205, gene43823:106582669, gene5057:106590657, gene5400:106593639, gene6290:106599585, gene7…	0.02637
344	CC	GO:0016607	nuclear speck	gene10188:106603639, gene12283:106605616, gene12423:106605774, gene13721:106606950, gene13950:106607162, gene22237:106561392, gene28011:106566793, gene28770:106567727, gene33175:106572303, gene36639:106575550, gene3772:106577891, gene40889:106579776, gene41640:106580519, gene43823:106582669, gene44237:106583131, gene45005:106583767, gene4594:106585476, gene46444:106585038, gene51060:106589531, ge…	0.02661
345	CC	GO:0090533	cation-transporting ATPase complex	gene10487:106603933, gene11802:106605147, gene35261:100846967, gene47988:106586777	0.02689
346	CC	GO:0005920	smooth septate junction	gene20799:106613773, gene29552:106568492	0.0279
347	CC	GO:0034667	integrin alpha3-beta1 complex	gene40249:106579263, gene7248:106600863	0.0279
348	CC	GO:0005899	insulin receptor complex	gene15601:106608778, gene49296:106588073, gene66372:106592162	0.02856
349	CC	GO:0005719	nuclear euchromatin	gene1027:106604361, gene15578:106608616, gene18957:106611923, gene38727:106577610, gene39357:106578255, gene39631:106578540, gene40305:106579217, gene4594:106585476	0.03013
350	CC	GO:0098862	cluster of actin-based cell projections	gene11179:106604533, gene16405:106609517, gene17163:106610255, gene18872:106611857, gene2289:106563782, gene27670:106566571, gene29506:106568426, gene30436:106569329, gene32862:100380418, gene3388:106574328, gene3506:106575505, gene35671:106574566, gene37490:100306766, gene3906:106579373, gene40183:106579321, gene43271:106582091, gene43983:106582826, gene44404:106583168, gene47866:106586629, gene…	0.0326
351	CC	GO:0044306	neuron projection terminus	gene10424:106603870, gene11179:106604533, gene1851:106611671, gene18791:106611717, gene19986:106613013, gene23625:106562779, gene2377:106564765, gene24198:106563184, gene2772:106568685, gene28564:106567442, gene30144:106568821, gene31768:106570635, gene31999:106570851, gene34008:106572869, gene41235:106579965, gene41882:106580735, gene42649:106581490, gene42940:106581811, gene43885:106582617, gen…	0.03295
352	CC	GO:0030425	dendrite	gene1027:106604361, gene10424:106603870, gene10970:106604332, gene11179:106604533, gene11900:100136378, gene12957:106606308, gene14213:106607496, gene14257:106607467, gene14878:106608063, gene15578:106608616, gene16405:106609517, gene16590:106609675, gene1697:106613059, gene18047:106611136, gene1851:106611671, gene18791:106611717, gene18957:106611923, gene19122:106612116, gene19414:106612392, gen…	0.03339
353	CC	GO:0034752	cytosolic aryl hydrocarbon receptor comp...	gene43593:100136911, gene51815:106590294	0.03508
354	CC	GO:0034753	nuclear aryl hydrocarbon receptor comple...	gene43593:100136911, gene51815:106590294	0.03508
355	CC	GO:0061174	type I terminal bouton	gene31768:106570635, gene42649:106581490	0.03508
356	CC	GO:0032279	asymmetric synapse	gene19986:106613013, gene33354:106572111, gene34008:106572869, gene43885:106582617	0.03539
357	CC	GO:0043204	perikaryon	gene18047:106611136, gene19986:106613013, gene24024:106563326, gene25498:106564692, gene29294:106568245, gene30307:106569207, gene34008:106572869, gene41882:106580735, gene43038:106581900, gene44299:106583079, gene44744:106583415, gene46248:106585191, gene4865:106589006, gene66786:106592057, gene7809:100195471	0.03654
358	CC	GO:0001527	microfibril	gene45633:106584371, gene61406:106595963, gene78169:106595265	0.03672
359	CC	GO:0097651	phosphatidylinositol 3-kinase complex, c...	gene21338:106560529, gene25518:106564678, gene4771:106587077	0.03672
360	CC	GO:0012506	vesicle membrane	gene10487:106603933, gene10674:106604103, gene12163:106605512, gene12957:106606308, gene17920:106611031, gene18872:106611857, gene19986:106613013, gene21390:106560584, gene21770:106560977, gene2182:106562596, gene22012:106561177, gene22400:100136366, gene2289:106563782, gene23625:106562779, gene24198:106563184, gene2536:106566762, gene27768:106566609, gene28159:106567054, gene30132:106568833, gen…	0.03721
361	CC	GO:0043679	axon terminus	gene10424:106603870, gene11179:106604533, gene1851:106611671, gene18791:106611717, gene19986:106613013, gene23625:106562779, gene2377:106564765, gene24198:106563184, gene28564:106567442, gene30144:106568821, gene31768:106570635, gene31999:106570851, gene34008:106572869, gene41235:106579965, gene41882:106580735, gene42649:106581490, gene42940:106581811, gene43885:106582617, gene44299:106583079, ge…	0.03939
362	CC	GO:0009986	cell surface	gene11802:106605147, gene12207:106605553, gene14611:106607799, gene15093:106608273, gene15723:106608847, gene15778:106608879, gene16790:106609880, gene17920:106611031, gene1851:106611671, gene18791:106611717, gene18872:106611857, gene19986:106613013, gene20083:106613089, gene20594:106613585, gene21390:106560584, gene21564:106560790, gene22400:100136366, gene22974:106562111, gene23957:106563139, g…	0.04209
363	CC	GO:0098797	plasma membrane protein complex	gene13172:106606520, gene13298:106606647, gene14878:106608063, gene15601:106608778, gene16790:106609880, gene1851:106611671, gene18791:106611717, gene19906:106612804, gene20083:106613089, gene20824:106613792, gene2377:106564765, gene2536:106566762, gene25706:106564879, gene25803:106564804, gene26385:106565592, gene28159:106567054, gene28816:106567683, gene29294:106568245, gene3388:106574328, gene…	0.04268
364	CC	GO:0031527	filopodium membrane	gene18791:106611717, gene29476:106568397, gene40249:106579263, gene41906:106580757, gene43271:106582091, gene7248:106600863	0.04353
365	CC	GO:0000785	chromatin	gene1027:106604361, gene11900:100136378, gene12063:106605451, gene13936:106607176, gene14213:106607496, gene15578:106608616, gene18957:106611923, gene2066:100195612, gene22999:106562092, gene23183:106562338, gene23207:100136926, gene23243:106562395, gene23795:106562945, gene26430:106565554, gene26712:106565791, gene28011:106566793, gene28336:100194884, gene30228:106569079, gene31696:106570557, ge…	0.04505
366	CC	GO:0098533	ATPase dependent transmembrane transport...	gene10487:106603933, gene11802:106605147, gene16790:106609880, gene35261:100846967, gene47988:106586777	0.0459
367	CC	GO:0044462	external encapsulating structure part	gene38124:106577006, gene39327:106578226, gene41235:106579965	0.04594
368	CC	GO:1990124	messenger ribonucleoprotein complex	gene10424:106603870, gene19986:106613013, gene34008:106572869, gene45475:106584219	0.04889

## Sheet: T6_SPLL_GO
X1	Category	ID	Term	Genes	adj_pval
1	MF	GO:0070330	aromatase activity	gene23207:100136926, gene48784:100136916	0.00067
2	MF	GO:0050682	AF-2 domain binding	gene15578:106608616, gene38727:106577610	0.00126
3	MF	GO:0042975	peroxisome proliferator activated recept...	gene15578:106608616, gene18957:106611923, gene38727:106577610	0.00139
4	MF	GO:0030284	estrogen receptor activity	gene19552:106612710, gene41882:106580735	0.00162
5	MF	GO:0045236	CXCR chemokine receptor binding	gene23764:100195999, gene32021:100196070	0.00182
6	MF	GO:0030546	receptor activator activity	gene15578:106608616, gene32021:100196070, gene38727:106577610	0.00288
7	MF	GO:0008009	chemokine activity	gene23764:100195999, gene32021:100196070	0.00298
8	MF	GO:0038191	neuropilin binding	gene43926:106582759, gene44034:106582865	0.00351
9	MF	GO:0043426	MRF binding	gene10745:106604170, gene19280:106612265	0.00351
10	MF	GO:0043014	alpha-tubulin binding	gene15578:106608616, gene18957:106611923, gene38727:106577610	0.0044
11	MF	GO:0016922	ligand-dependent nuclear receptor bindin...	gene15578:106608616, gene18957:106611923, gene38727:106577610	0.00467
12	MF	GO:0005242	inward rectifier potassium channel activ...	gene3816:106578513, gene42360:106581096	0.00841
13	MF	GO:0045499	chemorepellent activity	gene43926:106582759, gene44034:106582865	0.01015
14	MF	GO:0043566	structure-specific DNA binding	gene15578:106608616, gene18957:106611923, gene38727:106577610, gene40690:106579578, gene56427:106591944	0.01066
15	MF	GO:0004879	RNA polymerase II transcription factor a...	gene19552:106612710, gene41882:106580735, gene51815:106590294	0.01273
16	MF	GO:0098531	transcription factor activity, direct li...	gene19552:106612710, gene41882:106580735, gene51815:106590294	0.01273
17	MF	GO:0001078	transcriptional repressor activity, RNA ...	gene16077:106609245, gene19552:106612710, gene41882:106580735, gene44209:106582964, gene44210:106582962	0.01391
18	MF	GO:0055103	ligase regulator activity	gene18339:106611380, gene50696:106589124	0.01408
19	MF	GO:0031420	alkali metal ion binding	gene18339:106611380, gene42360:106581096	0.01569
20	MF	GO:0030331	estrogen receptor binding	gene15578:106608616, gene18957:106611923, gene38727:106577610	0.0162
21	MF	GO:0017134	fibroblast growth factor binding	gene2715:106567959, gene32021:100196070	0.01738
22	MF	GO:0070379	high mobility group box 1 binding	gene15093:106608273	0.01755
23	MF	GO:0033829	O-fucosylpeptide 3-beta-N-acetylglucosam...	gene65660:106594055	0.01755
24	MF	GO:0030215	semaphorin receptor binding	gene43926:106582759, gene44034:106582865	0.01796
25	MF	GO:0019825	oxygen binding	gene37891:106576803, gene816:106601984	0.01855
26	MF	GO:0016620	oxidoreductase activity, acting on the a...	gene41124:106580065, gene50811:106589322	0.01915
27	MF	GO:0008134	transcription factor binding	gene10745:106604170, gene13954:106607159, gene15093:106608273, gene15578:106608616, gene18957:106611923, gene19280:106612265, gene19552:106612710, gene38727:106577610, gene41882:106580735, gene44209:106582964, gene44210:106582962, gene44237:106583131, gene50696:106589124, gene51815:106590294	0.01915
28	MF	GO:0030374	ligand-dependent nuclear receptor transc...	gene15578:106608616, gene18957:106611923, gene38727:106577610	0.01951
29	MF	GO:0020037	heme binding	gene23207:100136926, gene37891:106576803, gene48784:100136916	0.02081
30	MF	GO:0005496	steroid binding	gene41124:106580065, gene41882:106580735, gene8520:106602157	0.02081
31	MF	GO:0017050	D-erythro-sphingosine kinase activity	gene13767:106606991	0.02103
32	MF	GO:0016774	phosphotransferase activity, carboxyl gr...	gene50811:106589322	0.02103
33	MF	GO:0042802	identical protein binding	gene1470:106609366, gene15093:106608273, gene16077:106609245, gene18047:106611136, gene2715:106567959, gene31223:106569924, gene32042:106570903, gene33996:100195428, gene41046:106580130, gene41124:106580065, gene41906:106580757, gene42294:106581151, gene42360:106581096, gene43271:106582091, gene43813:106582660, gene44210:106582962, gene4714:106587516, gene51343:100196374, gene9817:106603289, gene…	0.02351
34	MF	GO:0046906	tetrapyrrole binding	gene23207:100136926, gene37891:106576803, gene48784:100136916	0.02353
35	MF	GO:0042562	hormone binding	gene41124:106580065, gene41882:106580735, gene8520:106602157	0.02353
36	MF	GO:0051087	chaperone binding	gene44210:106582962, gene51343:100196374, gene8520:106602157	0.02388
37	MF	GO:0000982	transcription factor activity, RNA polym...	gene15093:106608273, gene16077:106609245, gene19552:106612710, gene28553:106567483, gene41882:106580735, gene44209:106582964, gene44210:106582962, gene44237:106583131	0.02427
38	MF	GO:0042979	ornithine decarboxylase regulator activi...	gene18047:106611136	0.02449
39	MF	GO:0004382	guanosine-diphosphatase activity	gene17920:106611031	0.02449
40	MF	GO:0015272	ATP-activated inward rectifier potassium...	gene42360:106581096	0.02449
41	MF	GO:0031798	type 1 metabotropic glutamate receptor b...	gene41882:106580735	0.02449
42	MF	GO:0004305	ethanolamine kinase activity	gene44250:106583121	0.02449
43	MF	GO:0005497	androgen binding	gene41124:106580065	0.02449
44	MF	GO:0004103	choline kinase activity	gene44250:106583121	0.02449
45	MF	GO:0016903	oxidoreductase activity, acting on the a...	gene41124:106580065, gene50811:106589322	0.0276
46	MF	GO:0008865	fructokinase activity	gene4714:106587516	0.02794
47	MF	GO:0019158	mannokinase activity	gene4714:106587516	0.02794
48	MF	GO:0015467	G-protein activated inward rectifier pot...	gene3816:106578513	0.02794
49	MF	GO:0005506	iron ion binding	gene23207:100136926, gene48784:100136916, gene816:106601984	0.02992
50	MF	GO:0004340	glucokinase activity	gene4714:106587516	0.03138
51	MF	GO:1990050	phosphatidic acid transporter activity	gene27168:106566111	0.03138
52	MF	GO:0018479	benzaldehyde dehydrogenase (NAD+) activi...	gene41124:106580065	0.03138
53	MF	GO:0004396	hexokinase activity	gene4714:106587516	0.03138
54	MF	GO:0019826	oxygen sensor activity	gene816:106601984	0.0348
55	MF	GO:0001758	retinal dehydrogenase activity	gene41124:106580065	0.0348
56	MF	GO:0000293	ferric-chelate reductase activity	gene47453:106586222	0.0348
57	MF	GO:0035240	dopamine binding	gene47850:106586618	0.03821
58	MF	GO:0005451	monovalent cation:proton antiporter acti...	gene35081:106573936	0.03821
59	MF	GO:0004871	signal transducer activity	gene13767:106606991, gene18189:106611249, gene19552:106612710, gene20824:106613792, gene20966:106613915, gene2715:106567959, gene30144:106568821, gene32021:100196070, gene37267:106576173, gene41882:106580735, gene43813:106582660, gene47359:106586132, gene47850:106586618, gene51815:106590294, gene52183:106590649	0.03884
60	MF	GO:0030165	PDZ domain binding	gene15093:106608273, gene36296:106575175, gene40618:106579507, gene42294:106581151	0.03989
61	MF	GO:0000981	RNA polymerase II transcription factor a...	gene15093:106608273, gene16077:106609245, gene19552:106612710, gene28553:106567483, gene41882:106580735, gene44209:106582964, gene44210:106582962, gene44237:106583131, gene51815:106590294, gene6530:106599739	0.04
62	MF	GO:0045134	uridine-diphosphatase activity	gene17920:106611031	0.04162
63	MF	GO:0004874	aryl hydrocarbon receptor activity	gene51815:106590294	0.04162
64	MF	GO:0004028	3-chloroallyl aldehyde dehydrogenase act...	gene41124:106580065	0.04162
65	MF	GO:0031545	peptidyl-proline 4-dioxygenase activity	gene816:106601984	0.04162
66	MF	GO:0016723	oxidoreductase activity, oxidizing metal...	gene47453:106586222	0.04162
67	MF	GO:0019842	vitamin binding	gene41124:106580065, gene816:106601984	0.04379
68	MF	GO:0001227	transcriptional repressor activity, RNA ...	gene16077:106609245, gene19552:106612710, gene41882:106580735, gene44209:106582964, gene44210:106582962	0.04402
69	MF	GO:0071820	N-box binding	gene44210:106582962	0.04501
70	MF	GO:0038036	sphingosine-1-phosphate receptor activit...	gene13767:106606991	0.04838
71	MF	GO:0016918	retinal binding	gene41124:106580065	0.04838
72	MF	GO:0016679	oxidoreductase activity, acting on diphe...	gene37891:106576803	0.04838
73	BP	GO:0007329	positive regulation of transcription fro...	gene15578:106608616, gene18957:106611923, gene38727:106577610	1.7e-06
74	BP	GO:2000184	positive regulation of progesterone bios...	gene15578:106608616, gene18957:106611923, gene38727:106577610	1.7e-06
75	BP	GO:0036273	response to statin	gene15578:106608616, gene18957:106611923, gene38727:106577610	1.7e-06
76	BP	GO:0035634	response to stilbenoid	gene15578:106608616, gene18957:106611923, gene38727:106577610	1.7e-06
77	BP	GO:1901860	positive regulation of mitochondrial DNA...	gene15578:106608616, gene18957:106611923, gene38727:106577610	4e-06
78	BP	GO:1901558	response to metformin	gene15578:106608616, gene18957:106611923, gene38727:106577610	4e-06
79	BP	GO:0051552	flavone metabolic process	gene15578:106608616, gene18957:106611923, gene38727:106577610	5.8e-06
80	BP	GO:0022010	central nervous system myelination	gene42360:106581096, gene44209:106582964, gene44210:106582962, gene9817:106603289	8.4e-06
81	BP	GO:0071250	cellular response to nitrite	gene15578:106608616, gene18957:106611923, gene38727:106577610	1.4e-05
82	BP	GO:0048662	negative regulation of smooth muscle cel...	gene15578:106608616, gene18957:106611923, gene38727:106577610, gene41882:106580735, gene50696:106589124	1.9e-05
83	BP	GO:0071332	cellular response to fructose stimulus	gene15578:106608616, gene18957:106611923, gene38727:106577610	3.2e-05
84	BP	GO:0043201	response to leucine	gene15578:106608616, gene18957:106611923, gene38727:106577610	3.8e-05
85	BP	GO:2000507	positive regulation of energy homeostasi...	gene15578:106608616, gene18957:106611923, gene38727:106577610	3.8e-05
86	BP	GO:0014878	response to electrical stimulus involved...	gene15578:106608616, gene18957:106611923, gene38727:106577610	5.3e-05
87	BP	GO:1901857	positive regulation of cellular respirat...	gene15578:106608616, gene18957:106611923, gene38727:106577610	7.2e-05
88	BP	GO:0097067	cellular response to thyroid hormone sti...	gene15578:106608616, gene18957:106611923, gene38727:106577610, gene43271:106582091	7.3e-05
89	BP	GO:2001171	positive regulation of ATP biosynthetic ...	gene15578:106608616, gene18957:106611923, gene38727:106577610	8.2e-05
90	BP	GO:0048661	positive regulation of smooth muscle cel...	gene15578:106608616, gene18957:106611923, gene20824:106613792, gene2715:106567959, gene38727:106577610, gene44209:106582964, gene44210:106582962	8.4e-05
91	BP	GO:0071313	cellular response to caffeine	gene15578:106608616, gene18957:106611923, gene38727:106577610	0.00012
92	BP	GO:0071873	response to norepinephrine	gene15578:106608616, gene18957:106611923, gene38727:106577610	0.00013
93	BP	GO:0042904	9-cis-retinoic acid biosynthetic process	gene37891:106576803, gene41124:106580065	0.0002
94	BP	GO:0014912	negative regulation of smooth muscle cel...	gene15578:106608616, gene18957:106611923, gene38727:106577610, gene50696:106589124	0.00022
95	BP	GO:0035865	cellular response to potassium ion	gene15578:106608616, gene18957:106611923, gene38727:106577610	0.00022
96	BP	GO:0097150	neuronal stem cell population maintenanc...	gene15093:106608273, gene30456:106569311, gene44209:106582964, gene44210:106582962	0.00047
97	BP	GO:2000544	regulation of endothelial cell chemotaxi...	gene22457:106561638, gene32021:100196070	0.00048
98	BP	GO:0071372	cellular response to follicle-stimulatin...	gene15578:106608616, gene18957:106611923, gene38727:106577610	0.00051
99	BP	GO:0006012	galactose metabolic process	gene15578:106608616, gene18957:106611923, gene38727:106577610	0.00058
100	BP	GO:0042668	auditory receptor cell fate determinatio...	gene44209:106582964, gene44210:106582962	0.0006
101	BP	GO:2000310	regulation of N-methyl-D-aspartate selec...	gene15578:106608616, gene18957:106611923, gene38727:106577610	0.00071
102	BP	GO:2000978	negative regulation of forebrain neuron ...	gene44209:106582964, gene44210:106582962	0.00073
103	BP	GO:0070236	negative regulation of activation-induce...	gene10745:106604170, gene19280:106612265	0.00073
104	BP	GO:0045820	negative regulation of glycolytic proces...	gene15578:106608616, gene18957:106611923, gene38727:106577610	0.0008
105	BP	GO:0010107	potassium ion import	gene3816:106578513, gene42360:106581096, gene8520:106602157	0.00085
106	BP	GO:0060346	bone trabecula formation	gene15578:106608616, gene33996:100195428, gene38727:106577610	0.00085
107	BP	GO:0001831	trophectodermal cellular morphogenesis	gene19552:106612710, gene41882:106580735	0.00087
108	BP	GO:0010041	response to iron(III) ion	gene33996:100195428, gene37891:106576803	0.00087
109	BP	GO:0030335	positive regulation of cell migration	gene13767:106606991, gene23764:100195999, gene30456:106569311, gene32021:100196070, gene33996:100195428, gene37891:106576803, gene41906:106580757, gene43271:106582091, gene43924:106582757, gene43926:106582759, gene44034:106582865, gene52183:106590649, gene6530:106599739	0.00088
110	BP	GO:0002931	response to ischemia	gene15578:106608616, gene18957:106611923, gene38727:106577610, gene4714:106587516	0.00089
111	BP	GO:0006591	ornithine metabolic process	gene18047:106611136, gene50811:106589322	0.00103
112	BP	GO:0043653	mitochondrial fragmentation involved in ...	gene15578:106608616, gene18957:106611923, gene38727:106577610	0.00106
113	BP	GO:0071392	cellular response to estradiol stimulus	gene15578:106608616, gene18957:106611923, gene38727:106577610, gene41882:106580735	0.00136
114	BP	GO:0032026	response to magnesium ion	gene13767:106606991, gene17920:106611031, gene42360:106581096	0.00137
115	BP	GO:0000302	response to reactive oxygen species	gene13767:106606991, gene15578:106608616, gene18957:106611923, gene20824:106613792, gene30144:106568821, gene37891:106576803, gene38727:106577610, gene52183:106590649, gene816:106601984	0.00148
116	BP	GO:0045765	regulation of angiogenesis	gene13767:106606991, gene15093:106608273, gene32021:100196070, gene33996:100195428, gene37267:106576173, gene37891:106576803, gene52183:106590649, gene816:106601984	0.00155
117	BP	GO:2000974	negative regulation of pro-B cell differ...	gene44209:106582964, gene44210:106582962	0.00157
118	BP	GO:0021627	olfactory nerve morphogenesis	gene18791:106611717, gene2715:106567959	0.00157
119	BP	GO:0048841	regulation of axon extension involved in...	gene43926:106582759, gene44034:106582865, gene9906:106603368	0.00173
120	BP	GO:0071871	response to epinephrine	gene15578:106608616, gene18957:106611923, gene38727:106577610	0.00189
121	BP	GO:0002021	response to dietary excess	gene15578:106608616, gene18957:106611923, gene38727:106577610	0.00189
122	BP	GO:0097094	craniofacial suture morphogenesis	gene22457:106561638, gene2715:106567959, gene30456:106569311	0.00198
123	BP	GO:0033189	response to vitamin A	gene33996:100195428, gene37891:106576803, gene41124:106580065	0.00198
124	BP	GO:0001834	trophectodermal cell proliferation	gene19552:106612710, gene41882:106580735	0.00199
125	BP	GO:0055016	hypochord development	gene15093:106608273, gene65660:106594055	0.00222
126	BP	GO:0008209	androgen metabolic process	gene15578:106608616, gene18957:106611923, gene38727:106577610	0.00224
127	BP	GO:0045747	positive regulation of Notch signaling p...	gene15093:106608273, gene44209:106582964, gene44210:106582962, gene65660:106594055	0.00224
128	BP	GO:0006390	transcription from mitochondrial promote...	gene15578:106608616, gene38727:106577610	0.00246
129	BP	GO:1903045	neural crest cell migration involved in ...	gene43926:106582759, gene44034:106582865	0.00246
130	BP	GO:0045608	negative regulation of auditory receptor...	gene15093:106608273, gene44210:106582962	0.00272
131	BP	GO:0046321	positive regulation of fatty acid oxidat...	gene15578:106608616, gene18957:106611923, gene38727:106577610	0.00305
132	BP	GO:0061008	hepaticobiliary system development	gene15093:106608273, gene2715:106567959, gene37891:106576803, gene41124:106580065, gene42294:106581151, gene44210:106582962, gene51815:106590294	0.00311
133	BP	GO:0014850	response to muscle activity	gene15578:106608616, gene18957:106611923, gene38727:106577610	0.00328
134	BP	GO:0021783	preganglionic parasympathetic fiber deve...	gene43926:106582759, gene44034:106582865, gene44210:106582962	0.00328
135	BP	GO:0070584	mitochondrion morphogenesis	gene15578:106608616, gene18957:106611923, gene38727:106577610	0.00351
136	BP	GO:0032693	negative regulation of interleukin-10 pr...	gene15093:106608273, gene50696:106589124	0.00354
137	BP	GO:0048371	lateral mesodermal cell differentiation	gene2715:106567959, gene6530:106599739	0.00354
138	BP	GO:0048771	tissue remodeling	gene15093:106608273, gene15578:106608616, gene18339:106611380, gene33996:100195428, gene38727:106577610, gene43926:106582759, gene44034:106582865	0.00391
139	BP	GO:0071354	cellular response to interleukin-6	gene15578:106608616, gene18957:106611923, gene38727:106577610	0.00402
140	BP	GO:0042664	negative regulation of endodermal cell f...	gene2715:106567959, gene28553:106567483	0.00415
141	BP	GO:0021828	gonadotrophin-releasing hormone neuronal...	gene43926:106582759, gene44034:106582865	0.00415
142	BP	GO:1903375	facioacoustic ganglion development	gene43926:106582759, gene44034:106582865	0.00415
143	BP	GO:0010819	regulation of T cell chemotaxis	gene23764:100195999, gene32021:100196070	0.00447
144	BP	GO:0010633	negative regulation of epithelial cell m...	gene15093:106608273, gene32021:100196070, gene43926:106582759, gene44034:106582865	0.00452
145	BP	GO:0071222	cellular response to lipopolysaccharide	gene15578:106608616, gene18957:106611923, gene23764:100195999, gene33996:100195428, gene38727:106577610, gene50696:106589124	0.0046
146	BP	GO:0010359	regulation of anion channel activity	gene36040:106574970, gene4714:106587516	0.00481
147	BP	GO:0097490	sympathetic neuron projection extension	gene43926:106582759, gene44034:106582865	0.00481
148	BP	GO:0097491	sympathetic neuron projection guidance	gene43926:106582759, gene44034:106582865	0.00481
149	BP	GO:0036486	ventral trunk neural crest cell migratio...	gene43926:106582759, gene44034:106582865	0.00481
150	BP	GO:2000272	negative regulation of receptor activity	gene15578:106608616, gene18957:106611923, gene38727:106577610	0.00485
151	BP	GO:0001822	kidney development	gene17851:106610840, gene18047:106611136, gene2715:106567959, gene31223:106569924, gene33996:100195428, gene41124:106580065, gene42360:106581096, gene44209:106582964, gene44210:106582962, gene51815:106590294	0.0052
152	BP	GO:0001892	embryonic placenta development	gene19552:106612710, gene2715:106567959, gene41882:106580735, gene44210:106582962, gene47359:106586132, gene816:106601984	0.00563
153	BP	GO:0010694	positive regulation of alkaline phosphat...	gene15578:106608616, gene38727:106577610	0.00587
154	BP	GO:0046683	response to organophosphorus	gene12894:106606240, gene13767:106606991, gene15578:106608616, gene30144:106568821, gene37891:106576803, gene38727:106577610	0.00594
155	BP	GO:0007386	compartment pattern specification	gene15093:106608273, gene65660:106594055	0.00625
156	BP	GO:0009409	response to cold	gene15578:106608616, gene18957:106611923, gene38727:106577610, gene44237:106583131	0.00676
157	BP	GO:0010463	mesenchymal cell proliferation	gene16077:106609245, gene22457:106561638, gene2715:106567959, gene6530:106599739	0.00688
158	BP	GO:0045670	regulation of osteoclast differentiation	gene15578:106608616, gene19552:106612710, gene38727:106577610, gene41882:106580735	0.007
159	BP	GO:0051384	response to glucocorticoid	gene15578:106608616, gene20824:106613792, gene37891:106576803, gene38727:106577610, gene42360:106581096, gene51815:106590294	0.00703
160	BP	GO:2000981	negative regulation of inner ear recepto...	gene15093:106608273, gene44209:106582964, gene44210:106582962	0.00723
161	BP	GO:2000020	positive regulation of male gonad develo...	gene43926:106582759, gene44034:106582865	0.00744
162	BP	GO:0003231	cardiac ventricle development	gene15093:106608273, gene2715:106567959, gene44210:106582962, gene51815:106590294, gene6530:106599739, gene816:106601984	0.00778
163	BP	GO:0061551	trigeminal ganglion development	gene43926:106582759, gene44034:106582865	0.00786
164	BP	GO:0030522	intracellular receptor signaling pathway	gene12894:106606240, gene15578:106608616, gene19306:106612291, gene19552:106612710, gene38727:106577610, gene41124:106580065, gene41882:106580735, gene51815:106590294, gene816:106601984	0.00793
165	BP	GO:0060445	branching involved in salivary gland mor...	gene2715:106567959, gene43926:106582759, gene44034:106582865	0.00815
166	BP	GO:0021637	trigeminal nerve structural organization	gene43926:106582759, gene44034:106582865	0.00829
167	BP	GO:1902287	semaphorin-plexin signaling pathway invo...	gene43926:106582759, gene44034:106582865	0.00829
168	BP	GO:1901863	positive regulation of muscle tissue dev...	gene15578:106608616, gene18957:106611923, gene2715:106567959, gene38727:106577610	0.00852
169	BP	GO:0099515	actin filament-based transport	gene41046:106580130, gene41906:106580757	0.00873
170	BP	GO:0050922	negative regulation of chemotaxis	gene32021:100196070, gene43926:106582759, gene44034:106582865	0.00876
171	BP	GO:0048264	determination of ventral identity	gene15093:106608273, gene28553:106567483	0.00918
172	BP	GO:0021861	forebrain radial glial cell differentiat...	gene44209:106582964, gene44210:106582962	0.00918
173	BP	GO:0055082	cellular chemical homeostasis	gene15578:106608616, gene18339:106611380, gene18791:106611717, gene18957:106611923, gene23764:100195999, gene24198:106563184, gene32021:100196070, gene36040:106574970, gene38727:106577610, gene41882:106580735, gene4714:106587516, gene47453:106586222, gene8520:106602157	0.0096
174	BP	GO:0060385	axonogenesis involved in innervation	gene43926:106582759, gene44034:106582865	0.00964
175	BP	GO:0042127	regulation of cell proliferation	gene10745:106604170, gene13767:106606991, gene15093:106608273, gene15578:106608616, gene16077:106609245, gene18047:106611136, gene18957:106611923, gene19280:106612265, gene19552:106612710, gene20824:106613792, gene22457:106561638, gene23764:100195999, gene2715:106567959, gene30144:106568821, gene31223:106569924, gene31821:106570689, gene32021:100196070, gene33996:100195428, gene37891:106576803, g…	0.01
176	BP	GO:0060711	labyrinthine layer development	gene2715:106567959, gene44210:106582962, gene47359:106586132, gene816:106601984	0.0101
177	BP	GO:0015695	organic cation transport	gene18047:106611136, gene35081:106573936	0.01011
178	BP	GO:0055098	response to low-density lipoprotein part...	gene33996:100195428, gene52183:106590649	0.01011
179	BP	GO:0060666	dichotomous subdivision of terminal unit...	gene43926:106582759, gene44034:106582865	0.01059
180	BP	GO:0060463	lung lobe morphogenesis	gene2715:106567959, gene6530:106599739	0.01108
181	BP	GO:0001889	liver development	gene15093:106608273, gene2715:106567959, gene37891:106576803, gene41124:106580065, gene42294:106581151, gene44210:106582962	0.01147
182	BP	GO:0003206	cardiac chamber morphogenesis	gene15093:106608273, gene2715:106567959, gene44210:106582962, gene51815:106590294, gene6530:106599739, gene816:106601984	0.01147
183	BP	GO:0060501	positive regulation of epithelial cell p...	gene16077:106609245, gene2715:106567959	0.01158
184	BP	GO:0042517	positive regulation of tyrosine phosphor...	gene44209:106582964, gene44210:106582962	0.01209
185	BP	GO:0045780	positive regulation of bone resorption	gene15578:106608616, gene38727:106577610	0.01209
186	BP	GO:0046852	positive regulation of bone remodeling	gene15578:106608616, gene38727:106577610	0.01209
187	BP	GO:0060462	lung lobe development	gene2715:106567959, gene6530:106599739	0.01209
188	BP	GO:0061549	sympathetic ganglion development	gene43926:106582759, gene44034:106582865	0.01209
189	BP	GO:0021612	facial nerve structural organization	gene43926:106582759, gene44034:106582865	0.01209
190	BP	GO:0030902	hindbrain development	gene15578:106608616, gene16077:106609245, gene18957:106611923, gene38727:106577610, gene41124:106580065, gene44210:106582962, gene65660:106594055	0.01233
191	BP	GO:0042574	retinal metabolic process	gene37891:106576803, gene41124:106580065	0.01261
192	BP	GO:1902668	negative regulation of axon guidance	gene43926:106582759, gene44034:106582865	0.01313
193	BP	GO:0048843	negative regulation of axon extension in...	gene43926:106582759, gene44034:106582865	0.01313
194	BP	GO:0048642	negative regulation of skeletal muscle t...	gene10745:106604170, gene19280:106612265	0.01313
195	BP	GO:0048545	response to steroid hormone	gene13767:106606991, gene15578:106608616, gene18957:106611923, gene19552:106612710, gene20824:106613792, gene30144:106568821, gene33996:100195428, gene37891:106576803, gene38727:106577610, gene41124:106580065, gene41882:106580735, gene42360:106581096, gene43271:106582091, gene51815:106590294, gene52183:106590649, gene816:106601984, gene8520:106602157	0.01319
196	BP	GO:0055094	response to lipoprotein particle	gene33996:100195428, gene52183:106590649	0.01367
197	BP	GO:0045742	positive regulation of epidermal growth ...	gene33996:100195428, gene41882:106580735	0.01478
198	BP	GO:0021785	branchiomotor neuron axon guidance	gene43926:106582759, gene44034:106582865	0.01478
199	BP	GO:0032355	response to estradiol	gene15578:106608616, gene18957:106611923, gene33996:100195428, gene37891:106576803, gene38727:106577610, gene41124:106580065, gene41882:106580735, gene51815:106590294, gene52183:106590649	0.01506
200	BP	GO:0019932	second-messenger-mediated signaling	gene13767:106606991, gene13954:106607159, gene18791:106611717, gene23764:100195999, gene30144:106568821, gene47850:106586618, gene6061:106598526	0.01513
201	BP	GO:0016338	calcium-independent cell-cell adhesion v...	gene42294:106581151, gene9906:106603368	0.01535
202	BP	GO:0060363	cranial suture morphogenesis	gene22457:106561638, gene2715:106567959	0.01535
203	BP	GO:0002687	positive regulation of leukocyte migrati...	gene23764:100195999, gene32021:100196070, gene33996:100195428, gene43924:106582757	0.01571
204	BP	GO:0048715	negative regulation of oligodendrocyte d...	gene44209:106582964, gene44210:106582962	0.01592
205	BP	GO:1901186	positive regulation of ERBB signaling pa...	gene33996:100195428, gene41882:106580735	0.01592
206	BP	GO:0060412	ventricular septum morphogenesis	gene2715:106567959, gene44210:106582962, gene816:106601984	0.01641
207	BP	GO:0050896	response to stimulus	gene10745:106604170, gene12894:106606240, gene13767:106606991, gene13954:106607159, gene15093:106608273, gene15578:106608616, gene16077:106609245, gene17851:106610840, gene17920:106611031, gene18047:106611136, gene18189:106611249, gene18339:106611380, gene18791:106611717, gene18957:106611923, gene19280:106612265, gene19306:106612291, gene19552:106612710, gene20824:106613792, gene20966:106613915, …	0.01669
208	BP	GO:0071356	cellular response to tumor necrosis fact...	gene13767:106606991, gene15578:106608616, gene18957:106611923, gene33996:100195428, gene37891:106576803, gene38727:106577610	0.01692
209	BP	GO:0046427	positive regulation of JAK-STAT cascade	gene37891:106576803, gene44209:106582964, gene44210:106582962	0.01702
210	BP	GO:1904894	positive regulation of STAT cascade	gene37891:106576803, gene44209:106582964, gene44210:106582962	0.01702
211	BP	GO:0045933	positive regulation of muscle contractio...	gene13767:106606991, gene6061:106598526, gene8520:106602157	0.01764
212	BP	GO:0002053	positive regulation of mesenchymal cell ...	gene16077:106609245, gene2715:106567959, gene6530:106599739	0.01795
213	BP	GO:0002763	positive regulation of myeloid leukocyte...	gene15578:106608616, gene38727:106577610, gene50696:106589124	0.01827
214	BP	GO:0030520	intracellular estrogen receptor signalin...	gene15578:106608616, gene38727:106577610, gene816:106601984	0.01827
215	BP	GO:0042572	retinol metabolic process	gene37891:106576803, gene41124:106580065	0.01832
216	BP	GO:2000794	regulation of epithelial cell proliferat...	gene16077:106609245, gene2715:106567959	0.01832
217	BP	GO:0071275	cellular response to aluminum ion	gene44237:106583131	0.01836
218	BP	GO:0006850	mitochondrial pyruvate transport	gene36040:106574970	0.01836
219	BP	GO:0017143	insecticide metabolic process	gene37891:106576803	0.01836
220	BP	GO:1902361	mitochondrial pyruvate transmembrane tra...	gene36040:106574970	0.01836
221	BP	GO:1990502	dense core granule maturation	gene30144:106568821	0.01836
222	BP	GO:0071387	cellular response to cortisol stimulus	gene37891:106576803	0.01836
223	CC	GO:0031528	microvillus membrane	gene23207:100136926, gene43271:106582091, gene48784:100136916	0.00065
224	CC	GO:0097440	apical dendrite	gene15578:106608616, gene18957:106611923, gene38727:106577610	0.00173
225	CC	GO:0005886	plasma membrane	gene13767:106606991, gene15093:106608273, gene17851:106610840, gene17920:106611031, gene18189:106611249, gene18339:106611380, gene18791:106611717, gene20824:106613792, gene20966:106613915, gene22457:106561638, gene23207:100136926, gene24198:106563184, gene2715:106567959, gene30144:106568821, gene30456:106569311, gene32042:106570903, gene33543:106572414, gene33996:100195428, gene35081:106573936, g…	0.00191
226	CC	GO:0005902	microvillus	gene17851:106610840, gene19306:106612291, gene23207:100136926, gene33543:106572414, gene42360:106581096, gene43271:106582091, gene48784:100136916	0.00222
227	CC	GO:0031527	filopodium membrane	gene18791:106611717, gene41906:106580757, gene43271:106582091	0.00248
228	CC	GO:0030315	T-tubule	gene3816:106578513, gene41882:106580735, gene43271:106582091, gene8520:106602157	0.00604
229	CC	GO:0005719	nuclear euchromatin	gene15578:106608616, gene18957:106611923, gene38727:106577610	0.00663
230	CC	GO:0030424	axon	gene13767:106606991, gene18047:106611136, gene18791:106611717, gene24198:106563184, gene30144:106568821, gene3816:106578513, gene41882:106580735, gene42294:106581151, gene43813:106582660, gene43926:106582759, gene44034:106582865, gene9906:106603368	0.01503
231	CC	GO:0044459	plasma membrane part	gene13767:106606991, gene15093:106608273, gene18791:106611717, gene20824:106613792, gene20966:106613915, gene23207:100136926, gene2715:106567959, gene30144:106568821, gene30456:106569311, gene32042:106570903, gene33543:106572414, gene36047:106574975, gene36296:106575175, gene37267:106576173, gene3816:106578513, gene39427:100195746, gene40618:106579507, gene41882:106580735, gene41906:106580757, ge…	0.01632
232	CC	GO:0033162	melanosome membrane	gene47850:106586618	0.01752
233	CC	GO:0045009	chitosome	gene47850:106586618	0.01752
234	CC	GO:0032809	neuronal cell body membrane	gene3816:106578513, gene42294:106581151	0.02029
235	CC	GO:0044298	cell body membrane	gene3816:106578513, gene42294:106581151	0.02029
236	CC	GO:0098793	presynapse	gene13767:106606991, gene18791:106611717, gene24198:106563184, gene30144:106568821, gene36296:106575175, gene41882:106580735, gene42294:106581151	0.02271
237	CC	GO:0044445	cytosolic part	gene15578:106608616, gene18957:106611923, gene38727:106577610, gene43813:106582660, gene51815:106590294	0.02329
238	CC	GO:0033061	DNA recombinase mediator complex	gene40690:106579578	0.02444
239	CC	GO:0031410	cytoplasmic vesicle	gene13767:106606991, gene15093:106608273, gene17851:106610840, gene17920:106611031, gene18047:106611136, gene24198:106563184, gene2715:106567959, gene30144:106568821, gene30456:106569311, gene31223:106569924, gene41046:106580130, gene42294:106581151, gene43271:106582091, gene43924:106582757, gene47850:106586618, gene56427:106591944, gene8520:106602157	0.02643
240	CC	GO:0043025	neuronal cell body	gene13767:106606991, gene15578:106608616, gene18047:106611136, gene18791:106611717, gene18957:106611923, gene3816:106578513, gene38727:106577610, gene41882:106580735, gene42294:106581151, gene43813:106582660, gene816:106601984	0.02898
241	CC	GO:0016323	basolateral plasma membrane	gene23207:100136926, gene42294:106581151, gene42360:106581096, gene43271:106582091, gene48784:100136916, gene8520:106602157	0.02931
242	CC	GO:0016023	cytoplasmic, membrane-bounded vesicle	gene13767:106606991, gene15093:106608273, gene17851:106610840, gene17920:106611031, gene18047:106611136, gene24198:106563184, gene2715:106567959, gene30144:106568821, gene31223:106569924, gene41046:106580130, gene42294:106581151, gene43271:106582091, gene43924:106582757, gene47850:106586618, gene8520:106602157	0.03061
243	CC	GO:0034752	cytosolic aryl hydrocarbon receptor comp...	gene51815:106590294	0.03131
244	CC	GO:0034753	nuclear aryl hydrocarbon receptor comple...	gene51815:106590294	0.03131
245	CC	GO:0043195	terminal bouton	gene18791:106611717, gene24198:106563184, gene30144:106568821, gene41882:106580735	0.0315
246	CC	GO:0005912	adherens junction	gene15093:106608273, gene17851:106610840, gene18339:106611380, gene24198:106563184, gene30456:106569311, gene31223:106569924, gene33543:106572414, gene36296:106575175, gene41906:106580757, gene42294:106581151, gene43271:106582091	0.03176
247	CC	GO:0016592	mediator complex	gene15578:106608616, gene38727:106577610	0.03406
248	CC	GO:0070435	Shc-EGFR complex	gene20824:106613792	0.03473
249	CC	GO:0070161	anchoring junction	gene15093:106608273, gene17851:106610840, gene18339:106611380, gene24198:106563184, gene30456:106569311, gene31223:106569924, gene33543:106572414, gene36296:106575175, gene41906:106580757, gene42294:106581151, gene43271:106582091	0.03736
250	CC	GO:0035003	subapical complex	gene15093:106608273	0.03814
251	CC	GO:0035061	interchromatin granule	gene44237:106583131	0.03814
252	CC	GO:0000220	vacuolar proton-transporting V-type ATPa...	gene24198:106563184	0.04153
253	CC	GO:0016013	syntrophin complex	gene18791:106611717	0.04153
254	CC	GO:0034751	aryl hydrocarbon receptor complex	gene51815:106590294	0.04153
255	CC	GO:0033186	CAF-1 complex	gene36296:106575175	0.04829

## Sheet: BPplot
category	ID	term	count	genes	logFC	adj_pval	zscore	Treat	flag
BP	GO:0009409	response to cold	7	GENE18957:106611923	1.11679	3.6e-05	0.377964	LL	LL & SP
BP	GO:0007595	lactation	6	GENE14257:106607467	1.3692	6.7e-05	0	LL	No overlap
BP	GO:0071320	cellular response to cAMP	6	GENE10457:106603906	-1.26088	9.1e-05	-0.816497	LL	No overlap
BP	GO:0051591	response to cAMP	12	GENE10457:106603906	-1.26088	0.00011	0	LL	No overlap
BP	GO:0007568	aging	15	GENE14257:106607467	1.3692	0.00097	0.774597	LL	No overlap
BP	GO:0071774	response to fibroblast growth factor	13	GENE10457:106603906	-1.26088	0.00177	0.83205	LL	No overlap
BP	GO:0071345	cellular response to cytokine stimulus	18	GENE10457:106603906	-1.26088	0.00231	0.471405	LL	No overlap
BP	GO:0071371	cellular response to gonadotropin stimul...	6	GENE10457:106603906	-1.26088	0.00271	0	LL	LL & SP
BP	GO:0010469	regulation of receptor activity	7	GENE18791:106611717	2.87188	0.00283	2.64575	LL	No overlap
BP	GO:0032355	response to estradiol	8	GENE18957:106611923	1.11679	0.00287	0	LL	LL & SPLL
BP	GO:0070374	positive regulation of ERK1 and ERK2 cas...	7	GENE22457:106561638	1.21302	0.00298	0.377964	LL	No overlap
BP	GO:0009749	response to glucose	9	GENE10457:106603906	-1.26088	0.00373	1	LL	No overlap
BP	GO:0019932	second-messenger-mediated signaling	9	GENE13954:106607159	2.83088	0.00426	1.66667	LL	LL & SPLL
BP	GO:0051384	response to glucocorticoid	7	GENE16874:106609958	-1.27491	0.00455	0.377964	LL	LL & SPLL
BP	GO:0043065	positive regulation of apoptotic process	17	GENE10188:106603639	1.54316	0.00742	1.21268	LL	LL & SP
BP	GO:0071375	cellular response to peptide hormone sti...	13	GENE10457:106603906	-1.26088	0.00806	0.27735	LL	No overlap
BP	GO:0030334	regulation of cell migration	20	GENE15093:106608273	1.05518	0.00816	2.68328	LL	No overlap
BP	GO:0044708	single-organism behavior	14	GENE10457:106603906	-1.26088	0.00902	2.13809	LL	No overlap
BP	GO:0050890	cognition	10	GENE10457:106603906	-1.26088	0.00982	0.632456	LL	No overlap
BP	GO:0034764	positive regulation of transmembrane tra...	6	GENE14257:106607467	1.3692	0.01129	1.63299	LL	No overlap
BP	GO:0071383	cellular response to steroid hormone sti...	9	GENE10457:106603906	-1.26088	0.01138	1	LL	No overlap
BP	GO:0001655	urogenital system development	14	GENE10188:106603639	1.54316	0.01188	2.13809	LL	No overlap
BP	GO:0050806	positive regulation of synaptic transmis...	6	GENE10457:106603906	-1.26088	0.01231	0.816497	LL	No overlap
BP	GO:0002064	epithelial cell development	10	GENE14257:106607467	1.3692	0.01381	1.89737	LL	No overlap
BP	GO:0060537	muscle tissue development	13	GENE10457:106603906	-1.26088	0.0142	1.38675	LL	No overlap
BP	GO:0006457	protein folding	6	GENE17920:106611031	2.61974	0.01498	1.63299	LL	No overlap
BP	GO:0002066	columnar/cuboidal epithelial cell develo...	6	GENE14257:106607467	1.3692	0.01498	2.44949	LL	No overlap
BP	GO:0001678	cellular glucose homeostasis	6	GENE18957:106611923	1.11679	0.01529	2.44949	LL	No overlap
BP	GO:0007611	learning or memory	9	GENE10457:106603906	-1.26088	0.01544	1	LL	No overlap
BP	GO:0000302	response to reactive oxygen species	8	GENE18957:106611923	1.11679	0.0166	2.82843	LL	LL, SP & SPLL
BP	GO:0043523	regulation of neuron apoptotic process	8	GENE10457:106603906	-1.26088	0.01684	-0.707107	LL	No overlap
BP	GO:0097285	cell-type specific apoptotic process	13	GENE10457:106603906	-1.26088	0.01729	0.83205	LL	No overlap
BP	GO:0060086	circadian temperature homeostasis	7	GENE11900:100136378	1.9437	7.8e-07	2.64575	SP	No overlap
BP	GO:0000122	negative regulation of transcription fro...	126	GENE10079:106603496	1.13545	1.5e-06	7.30514	SP	No overlap
BP	GO:0045668	negative regulation of osteoblast differ...	23	GENE11332:106604687	1.6961	2.4e-06	3.96177	SP	No overlap
BP	GO:0032922	circadian regulation of gene expression	21	GENE1027:106604361	1.04885	2e-05	3.27327	SP	No overlap
BP	GO:0071456	cellular response to hypoxia	34	GENE1027:106604361	1.04885	2.9e-05	4.80196	SP	No overlap
BP	GO:0045600	positive regulation of fat cell differen...	19	GENE10188:106603639	1.90993	3.1e-05	2.52357	SP	No overlap
BP	GO:0048015	phosphatidylinositol-mediated signaling	42	GENE14239:106607477	1.98968	3.2e-05	5.55492	SP	No overlap
BP	GO:0071260	cellular response to mechanical stimulus	23	GENE10457:106603906	1.34762	3.4e-05	2.71069	SP	No overlap
BP	GO:0043619	regulation of transcription from RNA pol...	9	GENE12423:106605774	1.46294	4.4e-05	3	SP	No overlap
BP	GO:0048469	cell maturation	45	GENE10079:106603496	1.13545	6.7e-05	4.62121	SP	No overlap
BP	GO:0034144	negative regulation of toll-like recepto...	6	GENE11900:100136378	1.9437	0.00013	2.44949	SP	No overlap
BP	GO:2000637	positive regulation of gene silencing by...	6	GENE31739:106570615	2.0225	0.00016	2.44949	SP	No overlap
BP	GO:0048662	negative regulation of smooth muscle cel...	11	GENE1027:106604361	1.04885	0.00021	1.50756	SP	No overlap
BP	GO:0043153	entrainment of circadian clock by photop...	11	GENE14878:106608063	1.73679	0.00023	2.11058	SP	No overlap
BP	GO:0045670	regulation of osteoclast differentiation	18	GENE1027:106604361	1.04885	0.00024	3.77124	SP	No overlap
BP	GO:0048625	myoblast fate commitment	7	GENE10527:100136800	-1.08454	0.00027	1.88982	SP	No overlap
BP	GO:0019722	calcium-mediated signaling	39	GENE10487:106603933	1.43734	0.00029	4.64372	SP	No overlap
BP	GO:0045892	negative regulation of transcription, DN...	186	GENE10079:106603496	1.13545	0.00032	9.09212	SP	No overlap
BP	GO:0007623	circadian rhythm	53	GENE1027:106604361	1.04885	0.00035	5.9065	SP	No overlap
BP	GO:0042026	protein refolding	9	GENE1970:106560625	1.86725	0.00036	2.33333	SP	No overlap
BP	GO:0008285	negative regulation of cell proliferatio...	104	GENE10188:106603639	1.90993	0.00036	7.2563	SP	No overlap
BP	GO:0071243	cellular response to arsenic-containing ...	8	GENE10424:106603870	1.06243	0.00036	2.82843	SP	No overlap
BP	GO:0003333	amino acid transmembrane transport	13	GENE15708:106608835	1.07596	0.00036	3.05085	SP	No overlap
BP	GO:0071871	response to epinephrine	9	GENE1027:106604361	1.04885	0.0004	2.33333	SP	No overlap
BP	GO:0043065	positive regulation of apoptotic process	96	GENE10188:106603639	1.90993	0.00042	5.51135	SP	LL & SP
BP	GO:0035947	regulation of gluconeogenesis by regulat...	7	GENE11900:100136378	1.9437	0.00044	2.64575	SP	No overlap
BP	GO:0015695	organic cation transport	7	GENE15708:106608835	1.07596	0.00044	1.13389	SP	No overlap
BP	GO:0046626	regulation of insulin receptor signaling...	15	GENE15601:106608778	1.20142	0.00044	3.87298	SP	No overlap
BP	GO:0060487	lung epithelial cell differentiation	13	GENE25948:106565282	1.51615	0.00046	2.49615	SP	No overlap
BP	GO:0061469	regulation of type B pancreatic cell pro...	6	GENE11900:100136378	1.9437	0.00046	2.44949	SP	No overlap
BP	GO:0090023	positive regulation of neutrophil chemot...	10	GENE12207:106605553	-1.14233	0.00048	1.26491	SP	No overlap
BP	GO:0042663	regulation of endodermal cell fate speci...	7	GENE1267:106608700	-1.04504	0.00051	1.13389	SP	No overlap
BP	GO:0006012	galactose metabolic process	7	GENE1027:106604361	1.04885	0.00068	1.88982	SP	No overlap
BP	GO:0042752	regulation of circadian rhythm	30	GENE1027:106604361	1.04885	0.00078	4.01663	SP	No overlap
BP	GO:0033673	negative regulation of kinase activity	43	GENE12863:106606205	2.11791	0.00078	5.03245	SP	No overlap
BP	GO:0000185	activation of MAPKKK activity	6	GENE21150:106560326	-1.06014	0.00079	0.816497	SP	No overlap
BP	GO:0045944	positive regulation of transcription fro...	131	GENE10079:106603496	1.13545	0.00083	7.95071	SP	No overlap
BP	GO:0030099	myeloid cell differentiation	82	GENE10188:106603639	1.90993	0.00092	6.62589	SP	No overlap
BP	GO:0071371	cellular response to gonadotropin stimul...	8	GENE1027:106604361	1.04885	0.00097	2.82843	SP	LL & SP
BP	GO:0072091	regulation of stem cell proliferation	27	GENE13936:106607176	1.04339	0.00099	4.04145	SP	No overlap
BP	GO:0045725	positive regulation of glycogen biosynth...	7	GENE15601:106608778	1.20142	0.00103	2.64575	SP	No overlap
BP	GO:0032869	cellular response to insulin stimulus	65	GENE10424:106603870	1.06243	0.00109	7.31805	SP	No overlap
BP	GO:1901861	regulation of muscle tissue development	28	GENE1027:106604361	1.04885	0.0011	4.91354	SP	No overlap
BP	GO:0001892	embryonic placenta development	28	GENE10856:106604211	1.1068	0.00118	2.64575	SP	SP & SPLL
BP	GO:0097191	extrinsic apoptotic signaling pathway	39	GENE14239:106607477	1.98968	0.0012	4.32346	SP	No overlap
BP	GO:0035024	negative regulation of Rho protein signa...	8	GENE21413:106560604	1.5933	0.0012	2.82843	SP	No overlap
BP	GO:0051930	regulation of sensory perception of pain	9	GENE10970:106604332	1.14511	0.00125	1	SP	No overlap
BP	GO:0006814	sodium ion transport	29	GENE10970:106604332	1.14511	0.00133	5.01377	SP	No overlap
BP	GO:2000273	positive regulation of receptor activity	13	GENE1027:106604361	1.04885	0.00147	3.05085	SP	No overlap
BP	GO:0071276	cellular response to cadmium ion	7	GENE19986:106613013	1.10637	0.00149	1.88982	SP	No overlap
BP	GO:0060346	bone trabecula formation	7	GENE1027:106604361	1.04885	0.00149	2.64575	SP	No overlap
BP	GO:1901985	positive regulation of protein acetylati...	12	GENE1027:106604361	1.04885	0.00151	2.3094	SP	No overlap
BP	GO:0035914	skeletal muscle cell differentiation	18	GENE10457:106603906	1.34762	0.00156	4.24264	SP	No overlap
BP	GO:0048514	blood vessel morphogenesis	90	GENE10457:106603906	1.34762	0.0016	7.37865	SP	No overlap
BP	GO:0007601	visual perception	24	GENE1080:106604807	1.87842	0.00163	4.08248	SP	No overlap
BP	GO:0051897	positive regulation of protein kinase B ...	18	GENE21522:100136550	1.4544	0.00164	2.82843	SP	No overlap
BP	GO:0009409	response to cold	16	GENE1027:106604361	1.04885	0.00167	3.5	SP	LL & SP
BP	GO:0032354	response to follicle-stimulating hormone	7	GENE1027:106604361	1.04885	0.00168	2.64575	SP	No overlap
BP	GO:1990314	cellular response to insulin-like growth...	6	GENE20142:106613130	1.55505	0.00171	2.44949	SP	No overlap
BP	GO:0007474	imaginal disc-derived wing vein specific...	6	GENE25538:106564658	2.32001	0.00171	1.63299	SP	No overlap
BP	GO:0010871	negative regulation of receptor biosynth...	6	GENE11900:100136378	1.9437	0.00171	1.63299	SP	No overlap
BP	GO:0046324	regulation of glucose import	17	GENE14680:106607855	-1.07494	0.00174	3.15296	SP	No overlap
BP	GO:0051402	neuron apoptotic process	43	GENE1027:106604361	1.04885	0.00196	5.03245	SP	No overlap
BP	GO:0002903	negative regulation of B cell apoptotic ...	6	GENE15601:106608778	1.20142	0.00197	2.44949	SP	No overlap
BP	GO:0048771	tissue remodeling	32	GENE1027:106604361	1.04885	0.00202	5.65685	SP	SP & SPLL
BP	GO:0001816	cytokine production	87	GENE1080:106604807	1.87842	0.0021	5.6822	SP	No overlap
BP	GO:0060397	JAK-STAT cascade involved in growth horm...	7	GENE15601:106608778	1.20142	0.00211	1.88982	SP	No overlap
BP	GO:0043129	surfactant homeostasis	7	GENE12423:106605774	1.46294	0.00211	2.64575	SP	No overlap
BP	GO:0045777	positive regulation of blood pressure	11	GENE10970:106604332	1.14511	0.00214	0.904534	SP	No overlap
BP	GO:2000505	regulation of energy homeostasis	10	GENE1027:106604361	1.04885	0.0022	3.16228	SP	No overlap
BP	GO:0046330	positive regulation of JNK cascade	27	GENE10549:106603990	1.25078	0.00224	2.88675	SP	No overlap
BP	GO:0014741	negative regulation of muscle hypertroph...	6	GENE21124:106560302	1.49226	0.00225	0.816497	SP	No overlap
BP	GO:0014910	regulation of smooth muscle cell migrati...	17	GENE1027:106604361	1.04885	0.00231	3.15296	SP	No overlap
BP	GO:0044849	estrous cycle	7	GENE1080:106604807	1.87842	0.00261	2.64575	SP	No overlap
BP	GO:0035640	exploration behavior	8	GENE40249:106579263	1.12905	0.00265	2.12132	SP	No overlap
BP	GO:0014898	cardiac muscle hypertrophy in response t...	8	GENE13936:106607176	1.04339	0.00265	2.12132	SP	No overlap
BP	GO:1900034	regulation of cellular response to heat	13	GENE19986:106613013	1.10637	0.00267	3.05085	SP	No overlap
BP	GO:0030073	insulin secretion	44	GENE11179:106604533	1.2514	0.00267	5.4272	SP	No overlap
BP	GO:0006111	regulation of gluconeogenesis	17	GENE1027:106604361	1.04885	0.00268	3.63803	SP	No overlap
BP	GO:0071222	cellular response to lipopolysaccharide	26	GENE1027:106604361	1.04885	0.00268	4.31455	SP	SP & SPLL
BP	GO:0071354	cellular response to interleukin-6	9	GENE1027:106604361	1.04885	0.00271	3	SP	No overlap
BP	GO:0051240	positive regulation of multicellular org...	203	GENE10012:106603555	1.20544	0.00272	9.89626	SP	No overlap
BP	GO:0001822	kidney development	53	GENE10188:106603639	1.90993	0.00289	5.63178	SP	SP & SPLL
BP	GO:0040015	negative regulation of multicellular org...	6	GENE26108:106565139	-1.11436	0.0029	0	SP	No overlap
BP	GO:0034063	stress granule assembly	6	GENE27768:106566609	1.06864	0.0029	2.44949	SP	No overlap
BP	GO:0061157	mRNA destabilization	6	GENE10424:106603870	1.06243	0.0029	2.44949	SP	No overlap
BP	GO:0050767	regulation of neurogenesis	125	GENE10012:106603555	1.20544	0.00311	8.13929	SP	No overlap
BP	GO:0006954	inflammatory response	68	GENE10970:106604332	1.14511	0.00315	5.09325	SP	No overlap
BP	GO:0031649	heat generation	8	GENE14486:106607709	-1.01889	0.00321	0.707107	SP	No overlap
BP	GO:0031016	pancreas development	21	GENE14239:106607477	1.98968	0.00321	2.83683	SP	No overlap
BP	GO:0051223	regulation of protein transport	108	GENE11179:106604533	1.2514	0.00326	7.12065	SP	No overlap
BP	GO:0009967	positive regulation of signal transducti...	196	GENE10079:106603496	1.13545	0.00333	9.14286	SP	No overlap
BP	GO:0031532	actin cytoskeleton reorganization	24	GENE12957:106606308	1.7718	0.00338	4.08248	SP	No overlap
BP	GO:0046651	lymphocyte proliferation	35	GENE12283:106605616	2.12882	0.0034	5.23996	SP	No overlap
BP	GO:0002076	osteoblast development	8	GENE13936:106607176	1.04339	0.00345	2.12132	SP	No overlap
BP	GO:0030336	negative regulation of cell migration	39	GENE1027:106604361	1.04885	0.00353	4.32346	SP	No overlap
BP	GO:0007455	eye-antennal disc morphogenesis	6	GENE15093:106608273	1.5435	0.00368	2.44949	SP	No overlap
BP	GO:0021988	olfactory lobe development	14	GENE25894:106565042	1.45134	0.00372	2.13809	SP	No overlap
BP	GO:0055072	iron ion homeostasis	17	GENE12423:106605774	1.46294	0.00375	4.12311	SP	No overlap
BP	GO:0007176	regulation of epidermal growth factor-ac...	8	GENE20824:106613792	1.40157	0.00375	2.12132	SP	No overlap
BP	GO:0010907	positive regulation of glucose metabolic...	16	GENE1027:106604361	1.04885	0.00381	3	SP	No overlap
BP	GO:0060213	positive regulation of nuclear-transcrib...	7	GENE10424:106603870	1.06243	0.00391	2.64575	SP	No overlap
BP	GO:0000302	response to reactive oxygen species	39	GENE1027:106604361	1.04885	0.00405	4.96397	SP	LL, SP & SPLL
BP	GO:0030225	macrophage differentiation	11	GENE14611:106607799	1.23282	0.00406	1.50756	SP	No overlap
BP	GO:0008630	intrinsic apoptotic signaling pathway in...	20	GENE16678:106609765	-1.01058	0.00413	3.1305	SP	No overlap
BP	GO:0032496	response to lipopolysaccharide	50	GENE1027:106604361	1.04885	0.00415	5.65685	SP	No overlap
BP	GO:0000271	polysaccharide biosynthetic process	24	GENE11900:100136378	1.9437	0.00415	4.49073	SP	No overlap
BP	GO:0031346	positive regulation of cell projection o...	60	GENE10424:106603870	1.06243	0.00424	6.19677	SP	No overlap
BP	GO:0043551	regulation of phosphatidylinositol 3-kin...	12	GENE15601:106608778	1.20142	0.00426	2.88675	SP	No overlap
BP	GO:0045663	positive regulation of myoblast differen...	8	GENE10527:100136800	-1.08454	0.00443	0	SP	No overlap
BP	GO:0055117	regulation of cardiac muscle contraction	19	GENE10487:106603933	1.43734	0.00443	2.9824	SP	No overlap
BP	GO:0007215	glutamate receptor signaling pathway	13	GENE1027:106604361	1.04885	0.00456	3.60555	SP	No overlap
BP	GO:0009966	regulation of signal transduction	331	GENE10012:106603555	1.20544	0.00456	12.2572	SP	No overlap
BP	GO:0045475	locomotor rhythm	9	GENE1851:106611671	1.03162	0.00459	1.66667	SP	No overlap
BP	GO:0048661	positive regulation of smooth muscle cel...	7	GENE15578:106608616	1.2157	8.4e-05	2.64575	SPLL	No overlap
BP	GO:0030335	positive regulation of cell migration	13	GENE13767:106606991	1.30667	0.00088	1.38675	SPLL	No overlap
BP	GO:0000302	response to reactive oxygen species	9	GENE13767:106606991	1.30667	0.00148	3	SPLL	LL, SP & SPLL
BP	GO:0045765	regulation of angiogenesis	8	GENE13767:106606991	1.30667	0.00155	1.41421	SPLL	No overlap
BP	GO:0061008	hepaticobiliary system development	7	GENE15093:106608273	1.30465	0.00311	2.64575	SPLL	No overlap
BP	GO:0048771	tissue remodeling	7	GENE15093:106608273	1.30465	0.00391	2.64575	SPLL	SP & SPLL
BP	GO:0071222	cellular response to lipopolysaccharide	6	GENE15578:106608616	1.2157	0.0046	1.63299	SPLL	SP & SPLL
BP	GO:0001822	kidney development	10	GENE17851:106610840	1.17752	0.0052	1.89737	SPLL	SP & SPLL
BP	GO:0001892	embryonic placenta development	6	GENE19552:106612710	-4.2006	0.00563	0.816497	SPLL	SP & SPLL
BP	GO:0046683	response to organophosphorus	6	GENE12894:106606240	-1.50955	0.00594	1.63299	SPLL	No overlap
BP	GO:0051384	response to glucocorticoid	6	GENE15578:106608616	1.2157	0.00703	2.44949	SPLL	LL & SPLL
BP	GO:0003231	cardiac ventricle development	6	GENE15093:106608273	1.30465	0.00778	2.44949	SPLL	No overlap
BP	GO:0030522	intracellular receptor signaling pathway	9	GENE12894:106606240	-1.50955	0.00793	1	SPLL	No overlap
BP	GO:0055082	cellular chemical homeostasis	13	GENE15578:106608616	1.2157	0.0096	0.83205	SPLL	No overlap
BP	GO:0042127	regulation of cell proliferation	31	GENE10745:106604170	1.16852	0.01	3.05329	SPLL	No overlap
BP	GO:0001889	liver development	6	GENE15093:106608273	1.30465	0.01147	2.44949	SPLL	No overlap
BP	GO:0003206	cardiac chamber morphogenesis	6	GENE15093:106608273	1.30465	0.01147	2.44949	SPLL	No overlap
BP	GO:0030902	hindbrain development	7	GENE15578:106608616	1.2157	0.01233	2.64575	SPLL	No overlap
BP	GO:0048545	response to steroid hormone	17	GENE13767:106606991	1.30667	0.01319	2.66789	SPLL	No overlap
BP	GO:0032355	response to estradiol	9	GENE15578:106608616	1.2157	0.01506	2.33333	SPLL	LL & SPLL
BP	GO:0019932	second-messenger-mediated signaling	7	GENE13767:106606991	1.30667	0.01513	1.88982	SPLL	LL & SPLL
BP	GO:0050896	response to stimulus	77	GENE10745:106604170	1.16852	0.01669	2.84901	SPLL	No overlap
BP	GO:0071356	cellular response to tumor necrosis fact...	6	GENE13767:106606991	1.30667	0.01692	2.44949	SPLL	No overlap

## Sheet: MFplot
category	ID	term	count	genes	logFC	adj_pval	zscore	Treat	flag
MF	GO:0005102	receptor binding	29	GENE11499:106604864	-1.08794	0.00387	2.78543	LL	LL & SP
MF	GO:0001077	transcriptional activator activity, RNA ...	9	GENE10457:106603906	-1.26088	0.00468	-1.66667	LL	LL & SP
MF	GO:0030165	PDZ domain binding	6	GENE14257:106607467	1.3692	0.00542	2.44949	LL	LL & SP
MF	GO:0030674	protein binding, bridging	7	GENE20824:106613792	1.44312	0.00565	0.377964	LL	LL & SP
MF	GO:0000977	RNA polymerase II regulatory region sequ...	14	GENE10188:106603639	1.54316	0.00761	-0.534522	LL	No overlap
MF	GO:0004888	transmembrane signaling receptor activit...	12	GENE16874:106609958	-1.27491	0.00844	2.3094	LL	LL & SP
MF	GO:0099600	transmembrane receptor activity	14	GENE16874:106609958	-1.27491	0.03466	2.67261	LL	No overlap
MF	GO:0004930	G-protein coupled receptor activity	6	GENE16874:106609958	-1.27491	0.03521	1.63299	LL	LL & SP
MF	GO:0050839	cell adhesion molecule binding	6	GENE18791:106611717	2.87188	0.04459	1.63299	LL	No overlap
MF	GO:0001078	transcriptional repressor activity, RNA ...	37	GENE10527:100136800	-1.08454	2.8e-08	3.12358	SP	No overlap
MF	GO:0016494	C-X-C chemokine receptor activity	7	GENE12207:106605553	-1.14233	1.7e-05	1.88982	SP	No overlap
MF	GO:0005158	insulin receptor binding	14	GENE14239:106607477	1.98968	2.5e-05	3.74166	SP	No overlap
MF	GO:0005159	insulin-like growth factor receptor bind...	10	GENE15601:106608778	1.20142	3.1e-05	1.26491	SP	No overlap
MF	GO:0008134	transcription factor binding	96	GENE10079:106603496	1.13545	4.2e-05	7.14435	SP	SP & SPLL
MF	GO:0008144	drug binding	22	GENE10970:106604332	1.14511	5.3e-05	1.70561	SP	No overlap
MF	GO:0000978	RNA polymerase II core promoter proximal...	55	GENE10527:100136800	-1.08454	6.3e-05	4.44972	SP	No overlap
MF	GO:0020037	heme binding	16	GENE1080:106604807	1.87842	0.00014	3.5	SP	No overlap
MF	GO:0004888	transmembrane signaling receptor activit...	71	GENE10970:106604332	1.14511	0.00017	5.81523	SP	LL & SP
MF	GO:0016712	oxidoreductase activity, acting on paire...	6	GENE1080:106604807	1.87842	0.00018	1.63299	SP	No overlap
MF	GO:0035035	histone acetyltransferase binding	12	GENE10457:106603906	1.34762	0.00059	3.4641	SP	No overlap
MF	GO:0003714	transcription corepressor activity	37	GENE10664:106604092	1.55401	0.00062	5.09637	SP	No overlap
MF	GO:0015171	amino acid transmembrane transporter act...	13	GENE15708:106608835	1.07596	0.00079	3.05085	SP	No overlap
MF	GO:0043548	phosphatidylinositol 3-kinase binding	12	GENE15601:106608778	1.20142	0.00099	2.88675	SP	No overlap
MF	GO:0005328	neurotransmitter:sodium symporter activi...	6	GENE27233:106566182	1.3824	0.00112	2.44949	SP	No overlap
MF	GO:0001222	transcription corepressor binding	7	GENE11900:100136378	1.9437	0.00114	2.64575	SP	No overlap
MF	GO:0008081	phosphoric diester hydrolase activity	13	GENE10012:106603555	1.20544	0.00169	1.38675	SP	No overlap
MF	GO:0004871	signal transducer activity	124	GENE10549:106603990	1.25078	0.00197	7.00461	SP	SP & SPLL
MF	GO:0031625	ubiquitin protein ligase binding	42	GENE1027:106604361	1.04885	0.00198	4.32049	SP	No overlap
MF	GO:0000979	RNA polymerase II core promoter sequence...	15	GENE10457:106603906	1.34762	0.00216	3.87298	SP	No overlap
MF	GO:0001077	transcriptional activator activity, RNA ...	39	GENE10457:106603906	1.34762	0.00245	3.68295	SP	LL & SP
MF	GO:0001664	G-protein coupled receptor binding	30	GENE10487:106603933	1.43734	0.00264	2.92119	SP	No overlap
MF	GO:0001047	core promoter binding	35	GENE10457:106603906	1.34762	0.00276	4.56383	SP	No overlap
MF	GO:0015020	glucuronosyltransferase activity	8	GENE22757:106561911	1.22168	0.00412	2.12132	SP	No overlap
MF	GO:0042803	protein homodimerization activity	89	GENE10188:106603639	1.90993	0.00436	6.25399	SP	No overlap
MF	GO:0030331	estrogen receptor binding	12	GENE1027:106604361	1.04885	0.00457	2.3094	SP	No overlap
MF	GO:0015293	symporter activity	17	GENE16405:106609517	1.073	0.00484	3.15296	SP	No overlap
MF	GO:0003705	transcription factor activity, RNA polym...	26	GENE10188:106603639	1.90993	0.00492	3.53009	SP	No overlap
MF	GO:0051019	mitogen-activated protein kinase binding	10	GENE14878:106608063	1.73679	0.00519	2.52982	SP	No overlap
MF	GO:0003707	steroid hormone receptor activity	10	GENE11900:100136378	1.9437	0.00519	1.26491	SP	No overlap
MF	GO:0019900	kinase binding	97	GENE10549:106603990	1.25078	0.00681	8.42737	SP	No overlap
MF	GO:0031072	heat shock protein binding	20	GENE18991:106611988	1.1616	0.0074	3.57771	SP	No overlap
MF	GO:0004725	protein tyrosine phosphatase activity	13	GENE2341:106564343	1.57962	0.00793	3.60555	SP	No overlap
MF	GO:0035591	signaling adaptor activity	15	GENE15601:106608778	1.20142	0.00852	2.32379	SP	No overlap
MF	GO:0017017	MAP kinase tyrosine/serine/threonine pho...	6	GENE2341:106564343	1.57962	0.00898	2.44949	SP	No overlap
MF	GO:0017046	peptide hormone binding	9	GENE21338:106560529	1.73885	0.00963	3	SP	No overlap
MF	GO:0015932	nucleobase-containing compound transmemb...	8	GENE10487:106603933	1.43734	0.00977	1.41421	SP	No overlap
MF	GO:0035326	enhancer binding	23	GENE10188:106603639	1.90993	0.00977	3.12772	SP	No overlap
MF	GO:0001102	RNA polymerase II activating transcripti...	11	GENE10079:106603496	1.13545	0.01047	2.7136	SP	No overlap
MF	GO:0015215	nucleotide transmembrane transporter act...	7	GENE10487:106603933	1.43734	0.01088	1.13389	SP	No overlap
MF	GO:0098531	transcription factor activity, direct li...	13	GENE11900:100136378	1.9437	0.01247	1.94145	SP	No overlap
MF	GO:0004879	RNA polymerase II transcription factor a...	13	GENE11900:100136378	1.9437	0.01247	1.94145	SP	No overlap
MF	GO:0030674	protein binding, bridging	26	GENE11802:106605147	1.88988	0.01264	3.13786	SP	LL & SP
MF	GO:0019198	transmembrane receptor protein phosphata...	7	GENE30144:106568821	1.38491	0.01341	2.64575	SP	No overlap
MF	GO:0015296	anion:cation symporter activity	7	GENE19948:106612936	1.36338	0.01341	2.64575	SP	No overlap
MF	GO:0051879	Hsp90 protein binding	9	GENE18991:106611988	1.1616	0.01659	3	SP	No overlap
MF	GO:0042975	peroxisome proliferator activated recept...	6	GENE1027:106604361	1.04885	0.01711	2.44949	SP	No overlap
MF	GO:0019902	phosphatase binding	31	GENE11802:106605147	1.88988	0.01836	3.77171	SP	No overlap
MF	GO:0001046	core promoter sequence-specific DNA bind...	26	GENE10457:106603906	1.34762	0.01894	4.70679	SP	No overlap
MF	GO:0016773	phosphotransferase activity, alcohol gro...	66	GENE10488:106603934	1.48667	0.02044	5.66221	SP	No overlap
MF	GO:0015605	organophosphate ester transmembrane tran...	7	GENE10487:106603933	1.43734	0.0209	1.13389	SP	No overlap
MF	GO:0005516	calmodulin binding	23	GENE10488:106603934	1.48667	0.02201	3.96177	SP	No overlap
MF	GO:0016709	oxidoreductase activity, acting on paire...	6	GENE1080:106604807	1.87842	0.02419	2.44949	SP	No overlap
MF	GO:0008092	cytoskeletal protein binding	95	GENE1027:106604361	1.04885	0.02593	7.28445	SP	No overlap
MF	GO:0004930	G-protein coupled receptor activity	33	GENE10970:106604332	1.14511	0.02647	2.95932	SP	LL & SP
MF	GO:0045502	dynein binding	6	GENE20799:106613773	1.48906	0.0311	1.63299	SP	No overlap
MF	GO:0005057	receptor signaling protein activity	21	GENE10549:106603990	1.25078	0.03111	3.27327	SP	No overlap
MF	GO:0016493	C-C chemokine receptor activity	6	GENE29763:100195489	2.10915	0.03123	2.44949	SP	No overlap
MF	GO:0031490	chromatin DNA binding	16	GENE1027:106604361	1.04885	0.03226	2.5	SP	No overlap
MF	GO:0030545	receptor regulator activity	7	GENE1027:106604361	1.04885	0.03255	1.88982	SP	No overlap
MF	GO:0032559	adenyl ribonucleotide binding	89	GENE10487:106603933	1.43734	0.03295	7.31399	SP	No overlap
MF	GO:0015175	neutral amino acid transmembrane transpo...	6	GENE15708:106608835	1.07596	0.033	2.44949	SP	No overlap
MF	GO:0008519	ammonium transmembrane transporter activ...	6	GENE18047:106611136	-2.63452	0.033	1.63299	SP	No overlap
MF	GO:0005249	voltage-gated potassium channel activity	7	GENE1834:106611875	1.25897	0.03426	1.88982	SP	No overlap
MF	GO:0030554	adenyl nucleotide binding	89	GENE10487:106603933	1.43734	0.03589	7.31399	SP	No overlap
MF	GO:0001076	transcription factor activity, RNA polym...	24	GENE10079:106603496	1.13545	0.03599	4.08248	SP	No overlap
MF	GO:0043014	alpha-tubulin binding	7	GENE1027:106604361	1.04885	0.03602	1.88982	SP	No overlap
MF	GO:0005102	receptor binding	151	GENE1027:106604361	1.04885	0.03607	8.05651	SP	LL & SP
MF	GO:0015399	primary active transmembrane transporter...	13	GENE10487:106603933	1.43734	0.0361	3.60555	SP	No overlap
MF	GO:0015405	P-P-bond-hydrolysis-driven transmembrane...	13	GENE10487:106603933	1.43734	0.0361	3.60555	SP	No overlap
MF	GO:0004672	protein kinase activity	57	GENE10488:106603934	1.48667	0.03622	5.43058	SP	No overlap
MF	GO:0030165	PDZ domain binding	19	GENE10970:106604332	1.14511	0.03666	3.90007	SP	LL & SP
MF	GO:0046873	metal ion transmembrane transporter acti...	32	GENE10487:106603933	1.43734	0.03754	3.88909	SP	No overlap
MF	GO:1901677	phosphate transmembrane transporter acti...	7	GENE10487:106603933	1.43734	0.03785	1.13389	SP	No overlap
MF	GO:0008134	transcription factor binding	14	GENE10745:106604170	1.16852	0.01915	2.13809	SPLL	SP & SPLL
MF	GO:0042802	identical protein binding	20	GENE1470:106609366	1.30702	0.02351	1.34164	SPLL	No overlap
MF	GO:0000982	transcription factor activity, RNA polym...	8	GENE15093:106608273	1.30465	0.02427	0	SPLL	No overlap
MF	GO:0004871	signal transducer activity	15	GENE13767:106606991	1.30667	0.03884	0.774597	SPLL	SP & SPLL
MF	GO:0000981	RNA polymerase II transcription factor a...	10	GENE15093:106608273	1.30465	0.04	0.632456	SPLL	No overlap

## Sheet: CCplot
category	ID	term	count	genes	logFC	adj_pval	zscore	Treat	flag
CC	GO:0016323	basolateral plasma membrane	10	GENE14257:106607467	1.3692	0.00064	3.16228	LL	LL, SP & SPLL
CC	GO:0045177	apical part of cell	12	GENE15778:106608879	1.01779	0.00324	2.3094	LL	No overlap
CC	GO:0005886	plasma membrane	55	GENE10188:106603639	1.54316	0.00484	3.371	LL	LL & SPLL
CC	GO:0098793	presynapse	9	GENE14257:106607467	1.3692	0.00834	1.66667	LL	LL & SPLL
CC	GO:0043235	receptor complex	7	GENE22843:106561995	1.70744	0.01828	1.88982	LL	LL & SP
CC	GO:0042995	cell projection	36	GENE14257:106607467	1.3692	0.01901	3	LL	No overlap
CC	GO:0016324	apical plasma membrane	8	GENE18767:106611738	1.17332	0.02446	2.12132	LL	LL & SP
CC	GO:0033267	axon part	8	GENE18791:106611717	2.87188	0.02937	2.12132	LL	No overlap
CC	GO:0005902	microvillus	6	GENE19306:106612291	4.5181	0.03107	1.63299	LL	LL & SPLL
CC	GO:0030424	axon	13	GENE18047:106611136	-2.11112	0.03212	1.38675	LL	LL, SP & SPLL
CC	GO:0044459	plasma membrane part	36	GENE14257:106607467	1.3692	0.03272	3	LL	LL, SP & SPLL
CC	GO:0005887	integral component of plasma membrane	112	GENE10660:106604089	1.05306	1.4e-06	7.18132	SP	No overlap
CC	GO:0097440	apical dendrite	11	GENE1027:106604361	1.04885	1.4e-05	3.31662	SP	No overlap
CC	GO:0043025	neuronal cell body	85	GENE1027:106604361	1.04885	5.4e-05	6.18252	SP	SP & SPLL
CC	GO:0043197	dendritic spine	33	GENE10970:106604332	1.14511	8.2e-05	4.7001	SP	No overlap
CC	GO:0016323	basolateral plasma membrane	41	GENE11179:106604533	1.2514	0.00015	6.09078	SP	LL, SP & SPLL
CC	GO:0000932	cytoplasmic mRNA processing body	16	GENE13954:106607159	3.02147	0.00068	3.5	SP	No overlap
CC	GO:0044459	plasma membrane part	241	GENE10487:106603933	1.43734	0.00097	9.98443	SP	LL, SP & SPLL
CC	GO:0043235	receptor complex	36	GENE10970:106604332	1.14511	0.00105	4	SP	LL & SP
CC	GO:0030057	desmosome	8	GENE26813:106565964	1.08881	0.00151	2.12132	SP	No overlap
CC	GO:0016442	RISC complex	6	GENE20407:106613394	1.55809	0.0016	1.63299	SP	No overlap
CC	GO:0014069	postsynaptic density	41	GENE10424:106603870	1.06243	0.00252	4.84139	SP	No overlap
CC	GO:0060076	excitatory synapse	49	GENE10424:106603870	1.06243	0.0054	5.28571	SP	No overlap
CC	GO:0016581	NuRD complex	8	GENE12063:106605451	1.21808	0.0056	2.82843	SP	No overlap
CC	GO:0005901	caveola	21	GENE10970:106604332	1.14511	0.00698	4.14614	SP	No overlap
CC	GO:0031594	neuromuscular junction	17	GENE12863:106606205	2.11791	0.00755	3.15296	SP	No overlap
CC	GO:0044463	cell projection part	134	GENE10424:106603870	1.06243	0.00803	8.98423	SP	No overlap
CC	GO:0045211	postsynaptic membrane	22	GENE1851:106611671	1.03162	0.00811	2.13201	SP	No overlap
CC	GO:0042734	presynaptic membrane	13	GENE12163:106605512	2.0662	0.00955	0.83205	SP	No overlap
CC	GO:0016324	apical plasma membrane	40	GENE11179:106604533	1.2514	0.00962	5.6921	SP	LL & SP
CC	GO:0010494	cytoplasmic stress granule	11	GENE20407:106613394	1.55809	0.00987	2.7136	SP	No overlap
CC	GO:0001891	phagocytic cup	7	GENE16790:106609880	1.07047	0.0116	2.64575	SP	No overlap
CC	GO:0030054	cell junction	136	GENE10487:106603933	1.43734	0.01371	8.57493	SP	No overlap
CC	GO:0048471	perinuclear region of cytoplasm	86	GENE10012:106603555	1.20544	0.01374	5.6073	SP	No overlap
CC	GO:0030424	axon	73	GENE10424:106603870	1.06243	0.01723	5.9691	SP	LL, SP & SPLL
CC	GO:0072686	mitotic spindle	13	GENE1131:106605231	1.1135	0.01747	1.94145	SP	No overlap
CC	GO:0048786	presynaptic active zone	8	GENE1851:106611671	1.03162	0.019	2.12132	SP	No overlap
CC	GO:0031226	intrinsic component of plasma membrane	121	GENE10660:106604089	1.05306	0.02112	7.72727	SP	No overlap
CC	GO:0005903	brush border	20	GENE11179:106604533	1.2514	0.02356	4.47214	SP	No overlap
CC	GO:0017053	transcriptional repressor complex	22	GENE10079:106603496	1.13545	0.02637	4.26401	SP	No overlap
CC	GO:0016607	nuclear speck	22	GENE10188:106603639	1.90993	0.02661	3.83761	SP	No overlap
CC	GO:0005719	nuclear euchromatin	8	GENE1027:106604361	1.04885	0.03013	1.41421	SP	No overlap
CC	GO:0098862	cluster of actin-based cell projections	23	GENE11179:106604533	1.2514	0.0326	4.3788	SP	No overlap
CC	GO:0044306	neuron projection terminus	27	GENE10424:106603870	1.06243	0.03295	4.04145	SP	No overlap
CC	GO:0030425	dendrite	91	GENE1027:106604361	1.04885	0.03339	7.23317	SP	No overlap
CC	GO:0043204	perikaryon	15	GENE18047:106611136	-2.63452	0.03654	1.29099	SP	No overlap
CC	GO:0012506	vesicle membrane	48	GENE10487:106603933	1.43734	0.03721	5.48483	SP	No overlap
CC	GO:0043679	axon terminus	25	GENE10424:106603870	1.06243	0.03939	3.8	SP	No overlap
CC	GO:0009986	cell surface	71	GENE11802:106605147	1.88988	0.04209	5.34052	SP	No overlap
CC	GO:0098797	plasma membrane protein complex	43	GENE13172:106606520	1.68827	0.04268	2.59248	SP	No overlap
CC	GO:0031527	filopodium membrane	6	GENE18791:106611717	3.4293	0.04353	2.44949	SP	No overlap
CC	GO:0000785	chromatin	54	GENE1027:106604361	1.04885	0.04505	4.89898	SP	No overlap
CC	GO:0005886	plasma membrane	47	GENE13767:106606991	1.30667	0.00191	2.18797	SPLL	LL & SPLL
CC	GO:0005902	microvillus	7	GENE17851:106610840	1.17752	0.00222	1.88982	SPLL	LL & SPLL
CC	GO:0030424	axon	12	GENE13767:106606991	1.30667	0.01503	1.1547	SPLL	LL, SP & SPLL
CC	GO:0044459	plasma membrane part	31	GENE13767:106606991	1.30667	0.01632	1.25724	SPLL	LL, SP & SPLL
CC	GO:0098793	presynapse	7	GENE13767:106606991	1.30667	0.02271	1.88982	SPLL	LL & SPLL
CC	GO:0031410	cytoplasmic vesicle	17	GENE13767:106606991	1.30667	0.02643	1.69775	SPLL	No overlap
CC	GO:0043025	neuronal cell body	11	GENE13767:106606991	1.30667	0.02898	1.50756	SPLL	SP & SPLL
CC	GO:0016323	basolateral plasma membrane	6	GENE23207:100136926	3.60589	0.02931	1.63299	SPLL	LL, SP & SPLL
CC	GO:0016023	cytoplasmic, membrane-bounded vesicle	15	GENE13767:106606991	1.30667	0.03061	1.80739	SPLL	No overlap
CC	GO:0005912	adherens junction	11	GENE15093:106608273	1.30465	0.03176	1.50756	SPLL	No overlap
CC	GO:0070161	anchoring junction	11	GENE15093:106608273	1.30465	0.03736	1.50756	SPLL	No overlap
